# Supplementary material for: High DMS and monoterpene emitting big leaf Mahogany trees:discovery of a missing DMS source to the atmospheric environment
Source: Copernicus journal article supplement (doi:10.5194/acp-2019-489), 2019-06-06
Supplement: Supplementary file 1 [file acp-2019-489-supplement.pdf]

Supplementary information to:

**High DMS and monoterpene emitting big leaf Mahogany trees:  
discovery of a missing DMS source to the atmospheric environment**

Lejish Vettikkat<sup>1</sup>, Vinayak Sinha<sup>1</sup>, Savita Datta<sup>1</sup>, Ashish Kumar<sup>1</sup>, Haseeb Hakkim<sup>1</sup>, and Priya Yadav<sup>1</sup>,  
5 Baerbel Sinha<sup>1</sup>

<sup>1</sup>Department of Earth and Environmental Sciences, Indian Institute of Science Education and Research Mohali, Sector 81, S.  
A. S. Nagar, Manauli PO, Punjab, 140306, India

*Correspondence to:* Dr. Vinayak Sinha (vsinha@iisermohali.ac.in)

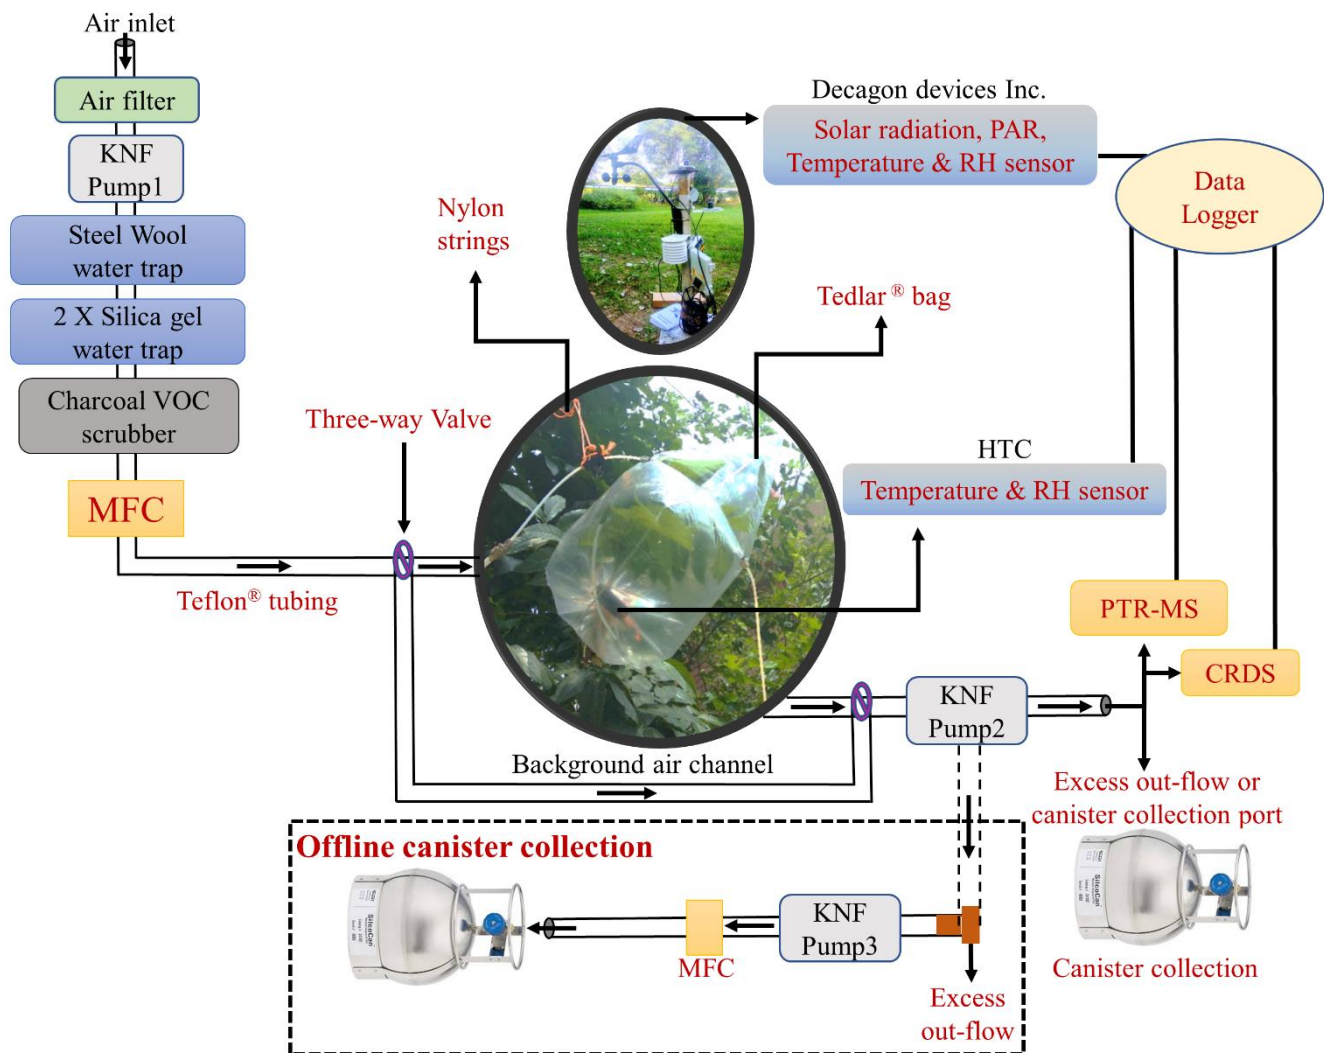

Figure S1. Schematic of dynamic branch cuvette setup. Offline canister collection scheme is depicted in the dashed rectangle. MFC: Mass flow controller. PTR-MS: proton transfer reaction mass spectrometry. CRDS: Cavity ring down spectroscopy. PAR: Photosynthetically active radiation.

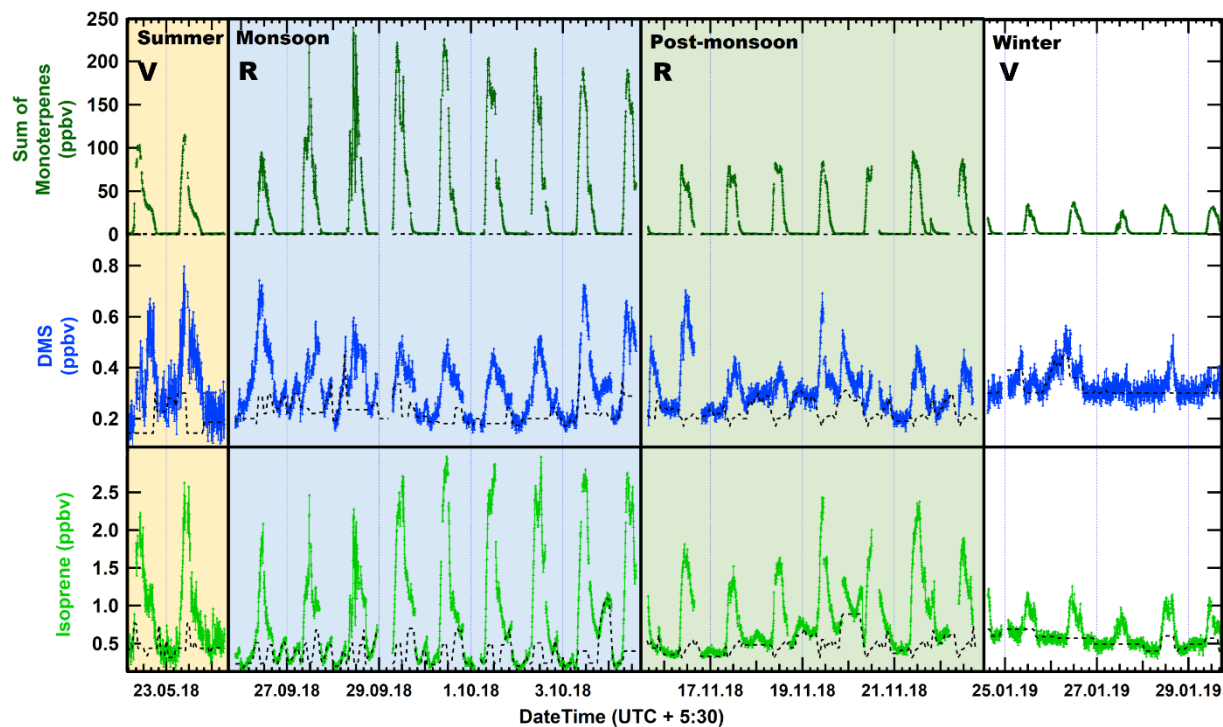

Figure S2: Time series of BVOC emissions with the corresponding background concentrations in  $\text{nmol mol}^{-1}$ . Background concentrations are shown as dotted line.

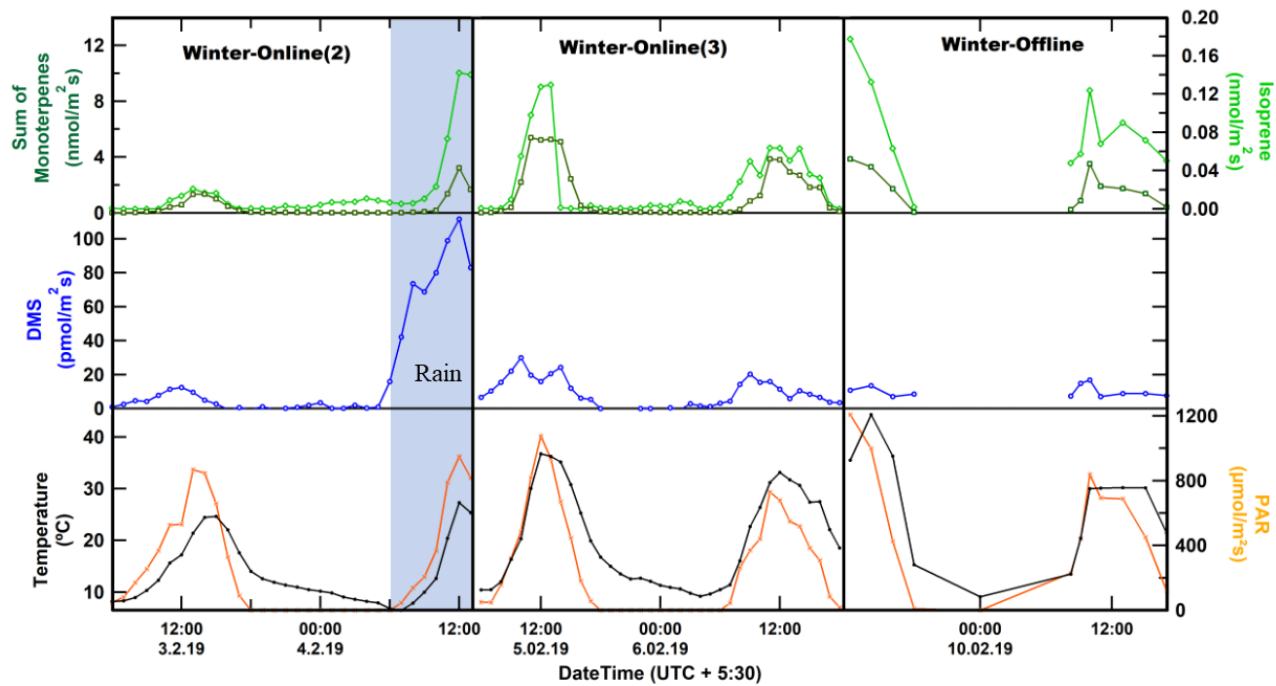

Figure S3: Wintertime BVOC fluxes along with PAR and temperature. (expressed in nanomols or picomols per leaf area per second). Blue shaded region shows rainy period.

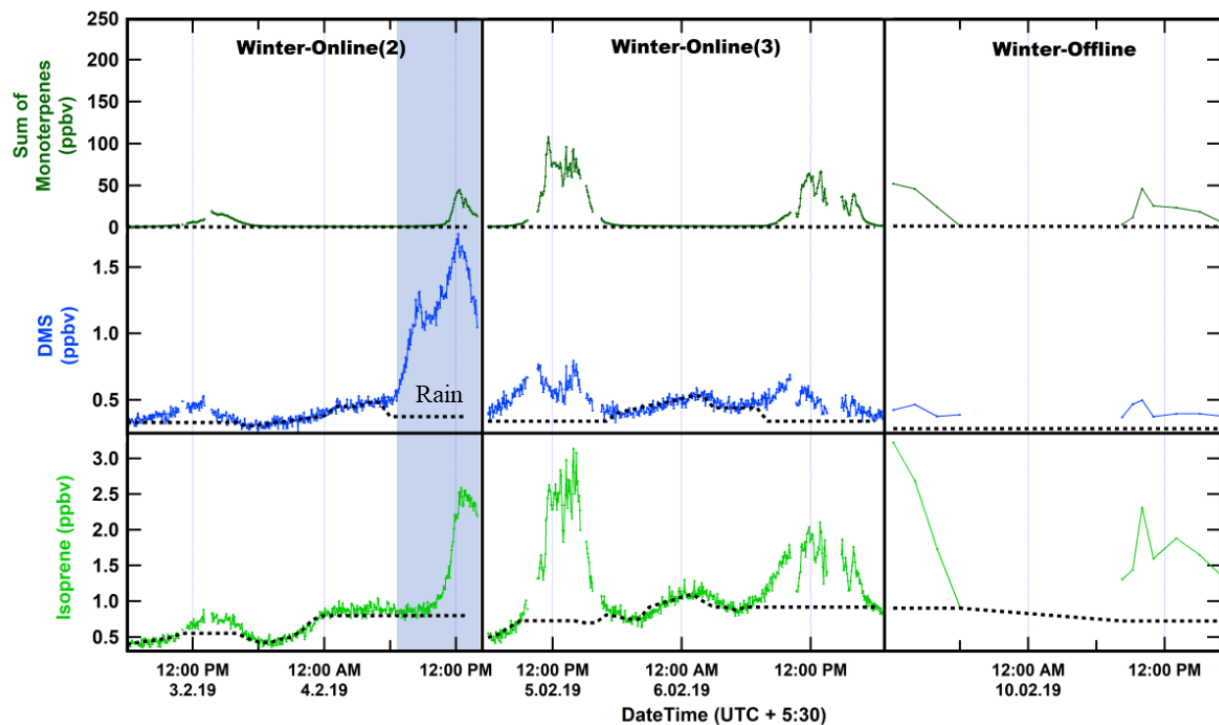

Figure S4: Time series of Wintertime BVOC emissions with the corresponding background concentrations in  $\text{nmol mol}^{-1}$ . Background concentrations are shown as dotted line. Blue shaded region shows rainy period.

**Table S1. Leaf area and leaf dry weight inside the cuvette during all the experiments**

| <b>Season</b>  | <b>Leaf area (m<sup>2</sup>)</b> | <b>Leaf dry weight (g)</b> | <b>g/m<sup>2</sup></b> |
|----------------|----------------------------------|----------------------------|------------------------|
| Summer         | 0.3                              | 30.1                       | 96.1                   |
| Monsoon        | 0.3                              | 28.2                       | 82.8                   |
| Post-monsoon   | 0.2                              | 20.5                       | 109.4                  |
| Winter         | 0.2                              | 26.8                       | 135.3                  |
| Winter (2)     | 0.3                              | 27.3                       | 102.3                  |
| Winter (3)     | 0.2                              | 31.7                       | 138.9                  |
| Winter-Offline | 0.3                              | 36.1                       | 139.8                  |
