# Supplementary material for: High DMS and monoterpene emitting big leaf Mahogany trees:discovery of a missing DMS source to the atmospheric environment
Source: Copernicus journal article supplement (doi:10.5194/acp-2019-489), 2019-06-06
Supplement: Supplementary file [file acp-2019-489-AC1-supplement.pdf]

## High DMS and monoterpene emitting big leaf Mahogany trees: discovery of a missing DMS source to the atmospheric environment

We greatly appreciate the positive remarks and constructive suggestions by the reviewers for improving the manuscript. In accordance with the valuable suggestions, we have undertaken the revisions. We have uploaded the revised manuscript in its final version along with a version that has the “track changes” mode for convenience and easy perusal to this response file.

We are confident that the revised manuscript has addressed all the valid concerns raised by the reviewers and hope that the revised submission may now be considered suitable for publication in ACP.

Best Regards,

Vinayak Sinha (on behalf of all authors)

Please find the revisions/replies (in blue) to the specific points (in black) raised by the esteemed reviewers for easy perusal.

### **Anonymous Referee #1**

**General comments:** This paper reports high volatile emissions from the big leaf Mahogany trees. Specifically, the authors have observed high emissions of volatiles identified as DMS and monoterpenes, and low from isoprene. By means of seasonal measurements, the authors describe the emissions as a function of environmental response such as temperature, radiation, and physiological growth phases and study the relationships with net assimilation. Using the seasonal fluxes, the authors provide the first global estimation of BVOC emissions from Mahogany trees and state that this tree-species is one of the missing natural sources of ambient DMS over the Amazon rainforest. Overall, the subjects addressed in the manuscript are appropriate for ACP. However, I have some serious concerns concerning reproducibility and chemical identification that needs to be addressed. Please see my specific questions below.

**Reply:** We are grateful to the reviewer for her/his careful reading of the manuscript and comments deeming that the manuscript is appropriate for ACP subject to addressing the major and minor comments raised in the esteemed and insightful review.

### **Specific comments:**

**1)** Number of biological replicates: The number of biological replicates (i.e. number of trees) is unclear. The authors state that they have used 4 different trees (P4L8). However, only one (n=1) was used for inter-seasonal variability (Figure 1). From the remaining 3 trees, 2 of them were measured “at high temporal resolution” online (P4L16) and 1 was sampled for “offline analysis”. Overall, the biological variability of BVOC emissions is never given, and which data is presented in figure 1 and table 1-2. Please provide the variance of data dispersion of the BVOC emission based on either standard error or standard deviations (see also further comments later on).

**Reply:** We regret that these details were not clear in our original submission due to the information being scattered in different places (e.g. figures in main paper and supplement). In order to make the above clear in the revised version and also considering the esteemed reviewer’s other points we have made the following changes in the revised version by adding a new Table (new Table 1 of revised MS and also shown below for easy perusal):

**Table 1.** Summary of the sampling details of all the four trees with average temperature, photosynthetic active radiation (PAR) and variability as standard deviation of the average in parantheses.

| TREE                    | Time period           | Temperature (°C)<br>avg (variability) | PAR ( $\mu\text{mol m}^{-2} \text{s}^{-1}$ )<br>avg (variability) |
|-------------------------|-----------------------|---------------------------------------|-------------------------------------------------------------------|
| Tree 1 (Winter)         | 24.01.2019-29.01.2019 | 13.5 (7.0)                            | 283 (408)                                                         |
| Tree 2 (Winter)         | 3.2.2019-4.2.2019     | 13.5 (6.1)                            | 252 (319)                                                         |
| Tree 3 (Winter)         | 5.2.2019-6.2.2019     | 19.9 (9.1)                            | 261 (310)                                                         |
| Tree 4 (Winter-offline) | 9.2.2019-10.2.2019    | 21.1 (12.1)                           | 338 (384)                                                         |
| Tree 1 (Summer)         | 22.05.2018-24.05.2018 | 34.9 (4.7)                            | 266 (384)                                                         |
| Tree 1 (Monsoon)        | 25.09.2018-04.10.2018 | 29.9 (8.0)                            | 232 (363)                                                         |
| Tree 1 (Post-monsoon)   | 15.11.2018-22.11.2018 | 21.1 (7.1)                            | 170 (278)                                                         |

Thus, during the winter season, four replicates were sampled as shown in the Table above.

The above information has now been added to the revised MS in Section 2.1, Paragraph 1; Lines 1-18 as follows:

*“Table 1 provides a summary of the sampling dates alongwith the average and ambient variability (as standard deviation) of the temperatures and photosynthetic active radiation (PAR) during each of the sampling experiments.”*

And by re-writing lines 6-9 at Page 4 (Section 2.1) of the original submission as follows:

*“While sampling and biogenic VOC emission measurements were performed from four Mahogany trees in winter (details in Table 1), the sampling and biogenic VOC emission measurements for three other seasons were from one of the four trees (namely Tree 1 in Table 1) as follows: 2018 summer from 22-24 May (n=52 hours of measurements), 2018 monsoon (n=200 hours of measurements) from 25 September-4 October, 2018 post-monsoon (n=163 hours of measurements) from 15-22 November, and 2019 winter from 24-29 January (n=120 hours of measurements).”*

As suggested by the reviewer we have also added additional information on the average hourly wintertime fluxes and variability (as standard deviation) for trees 2, 3 and 4 alongwith the average flux and variability observed for tree 1 (Figure 1 in revised MS).

This new Figure is also shown below for easy perusal:

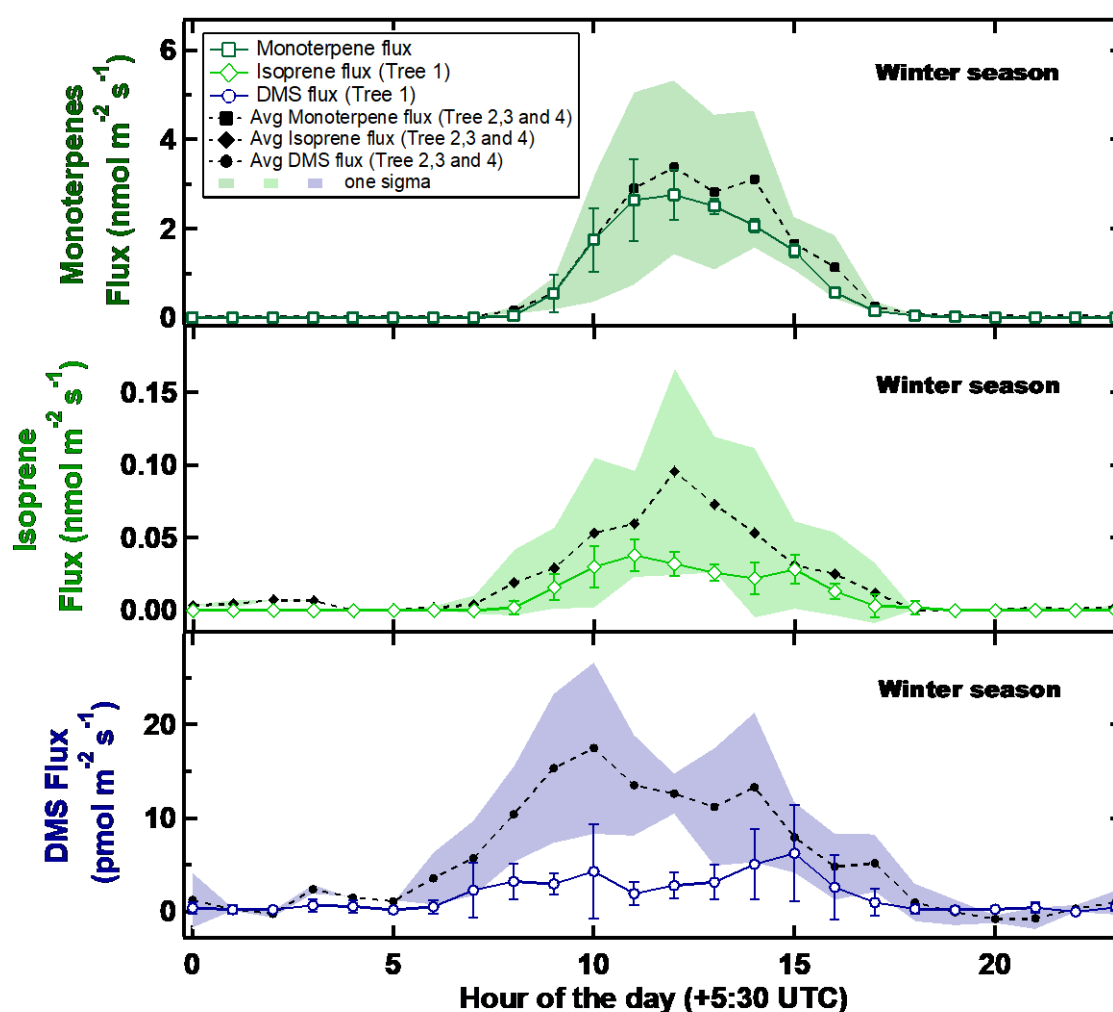

**Figure 1 of response and new Figure 1 of the revised submission.** Average wintertime fluxes and variability (as standard deviation) for trees 2, 3 and 4 shown in comparison to average flux and variability of tree 1

The new discussion pertaining to the above Figure has now been added at the start of the Results and Discussion as follows:

*“Figure 1 shows the average wintertime fluxes and variability (as standard deviation) from trees 2, 3 and 4 shown in comparison to the average flux and variability of tree 1. Earlier in Table 1, a summary of the sampling, PAR and temperature data for these experiments has already been provided. It can be observed that the observed hourly fluxes from Tree 1 (which was also sampled in three other seasons as mentioned in Section 2.1) were always within the observed one sigma variability of the fluxes for monoterpenes and isoprene obtained from Trees 2, 3 and 4 the observed hourly fluxes from Tree 1 (which was also sampled in other seasons) for monoterpenes and isoprene were always within the observed one sigma variability of the fluxes determined from Trees 2, 3 and 4. For DMS, the observed daytime fluxes from Tree 1 were at times lower than the 1 sigma variability range of the DMS flux observed from Trees 2, 3 and 4, and at the lower end of the observed fluxes from the other trees. This implies that the DMS fluxes obtained using Tree 1 do not overestimate the DMS fluxes for Swietenia macrophylla. Overall, based on comparison with three other replicate trees of Mahogany*

(trees 2, 3 and 4) for the wintertime data, one can surmise that there is no evidence of Tree1's emission profile and fluxes being anomalous."

In appreciation of the reviewer's further suggestion, in the revised Table 1 of original submission (which is now Table 2 of the revised submission), we now also include the variability (as 1 sigma standard deviation) for the seasonally averaged fluxes, and report the average flux from all four trees (n=4) for winter.

The revised Table 1 of the original submission (now new Table 2 of revised submission) is shown below for easy perusal:

**Table 2.** Average seasonal BVOCs fluxes from big-leaf Mahogany in different seasons normalized to the leaf dry weight alongwith variability as standard deviation of the average in parantheses.

| Season                        | Monoterpene<br>µg/g/hr | Isoprene<br>µg/g/hr | DMS<br>ng/g/hr |
|-------------------------------|------------------------|---------------------|----------------|
| Summer-Avg                    | 6.8 (10.1)             | 0.1 (0.1)           | 19.2 (19.0)    |
| Monsoon-Avg                   | 14.7(21.6)             | 0.1(0.1)            | 17.1 (17.1)    |
| Post-monsoon-Avg              | 7.8 (12.8)             | 0.1 (0.1)           | 18.8 (21.6)    |
| Winter-Avg (Trees 1,2,3<br>4) | 2.2 (3.6)              | 0.02 (0.02)         | 2.9 (4.3)      |

In response to the reviewer's comment about replicates, when the authors were preparing this response, they carefully also looked for the number of replicates studied in one of the previous pioneering DMS emission study by Jardine et al. 2015 who reported DMS emission data from 7 tropical trees. We could not find mention of the number of replicates that were sampled, and it appears that in those experiments also there was just one tree like in our study, the data in some instances was also only 4 days and no seasonal emission studies were reported for the DMS emission from those 7 trees. In spite of these constraints/limitations, the data from that study has been extremely helpful for us to interpret and discuss the present results. While we do appreciate the reviewer's point that sampling more replicates in other seasons would have been better and will make due note of this in the conclusions, the data from the four replicates (available for the winter season) does demonstrate that Tree 1 was certainly not anomalous with regard to BVOC emissions of monoterpenes, isoprene and DMS. There is therefore great value in reporting the seasonal data, considering the paucity of what is known about DMS seasonal emissions from trees (this study to the best of our knowledge contains first such information on seasonal emission tendencies). We are grateful that the reviewer's points have helped revise the original submission to clarify and strengthen these and related points.

We have added a new paragraph to the Conclusions section on Page 10 of original submission as follows:

*"While several novel insights have been obtained from this study such as discovery of a new terrestrial source with high emissions for monoterpenes and DMS relative to other known terrestrial sources, one limitation has been the lack of data from replicates for three of the four seasons. Based on comparison with three other replicate trees of Mahogany (Trees 2, 3 and 4) for the wintertime data, one can surmise that there is no evidence of Tree1's emission profile and fluxes being anomalous and hence considering the paucity of what is known about DMS*

*seasonal emissions from trees (this study to the best of our knowledge contains first such information on seasonal emission tendencies), the insights about seasonality of Mahogany emissions obtained in this study are also valuable. We acknowledge, however that data from more replicates would be better to characterize the intra-species and seasonal emissions variability better and should be addressed in future studies.”*

**2) Chemical identification of BVOCs:** This is largely uncertain especially for isoprene and DMS. The chemical identification of VOC requires special attention, in particular for uncharacterized tree species and when measurements are based only on PTR-MS. Especially for DMS, the key compound of the actual paper, more evidence should be provided. First of all, there is little and sometimes unclear evidence of DMS emissions from trees. Second of all, a chemical identification based on PTR-QMS (Q: quadrupole), with ~1 amu mass resolution is too little to certainly say that the volatile measured at  $m/z$  63 is DMS. For instance,  $m/z$  63 might originate from several VOCs, including those at MW ~62g/mol or larger but fragmenting down to  $m/z$  63. Some examples are the related dimethyl disulfide ( $\text{CH}_3\text{SSCH}_3$ , DMDS), and dimethyl trisulfide ( $\text{CH}_3\text{SSSCH}_3$ , DMTS), but possible any large compounds that fragment at  $m/z$  63. Similarly,  $m/z$  69 can be other than isoprene, for instance, alkyl aldehydes such as pentanal, octanal, nonanal, decanal, etc. I personally think that a large amount of  $m/z$  137 from plants is likely to be monoterpene, so here the result is, in my opinion, reasonable because it is extremely unlikely the large emission of other unknown biogenic volatiles at  $m/z$  137. Although the gold technique for VOC identification remains GC-MS, VOC might be convincingly identified using PTR-MS technology by proper additional fragmentation study, or isotopic pattern simulation study, or switching the reagent ion for VOC ionization.

**Reply:** We thank the reviewer for his/her critical comment about the chemical characterization of BVOCs especially since this tree was an uncharacterized tree species. We regret that we missed adding sufficient detail and discussion regarding the steps we took to address these known issues concerning identification of DMS and isoprene using a PTR-QMS in the original submission, as we wanted to keep the technical description short.

We regret the confusion to both reviewers 1 and 2 and readers due to it. Below please find the detailed discussion of how we conducted our experiments which addresses these technical issues /potential interferences raised both by reviewer 1 and 2:

When we commenced the first set of plant cuvette measurements in summer we undertook mass scans for the input air and output air into the branch cuvette over the entire mass range of ( $m/z$  21-  $m/z$  210) during the experiments. We found that in comparison to the ambient air, the mass scans contained very few peaks and the spectra was remarkably simple. A typical 30 min averaged mass scan of the output air from the branch cuvette system during the afternoon period (which was characterized by highest signals and concentrations) after subtracting the input air mass signal at the  $m/z$  channel is shown below.

**Figure 2 of response and new Figure S3:** A typical 30 min averaged PTR-MS mass scan of the output air from the branch cuvette system during the afternoon period after subtraction of input background air signals showing the ion signals observed in the mass range  $m/z$  40 to  $m/z$  210.

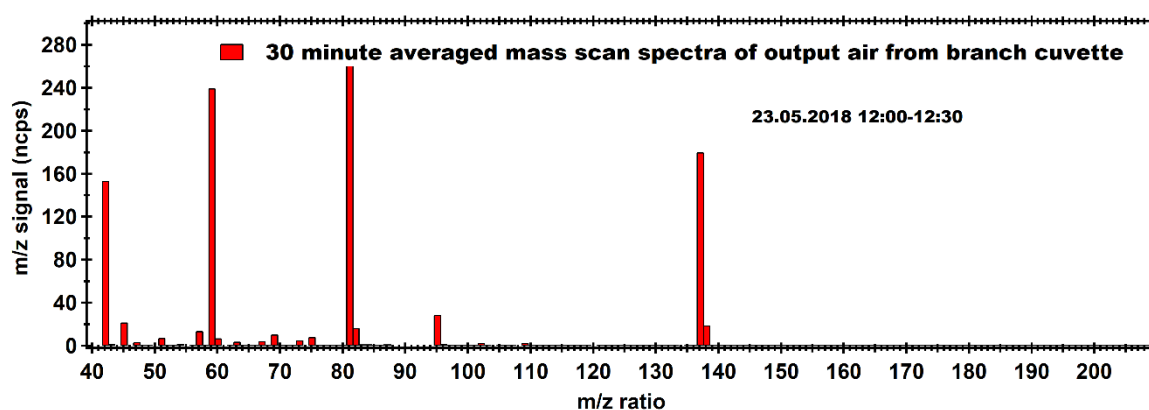

It can also be seen that the observed isotopic abundances of the shoulder peaks of  $m/z$  137 ion due to the natural C-13 abundance which should be 1.1% for each C-12 atom in the ion, and therefore 11.1% of  $m/z$  137 ion abundance at  $m/z$  138 and 6.6% of the  $m/z$  81 ion abundance, respectively are entirely consistent with the ion peaks being due to monoterpenes.

The results of these mass scans formed the basis for our choice of what masses to monitor in subsequent plant chamber experiments in other seasons from the same tree. Despite the simple spectra obtained in our mass scan results during summer, for subsequent experiments conducted in the selected ion monitoring (SIM) mode in other seasons, we still monitored 60  $m/z$  channels of interest keeping in mind the PTR-MS literature for BVOC emissions, major atmospheric VOCs, and abundant ions formed generally due to the ion chemistry in the PTR-MS drift tube, which include impurity ions such as  $m/z$  30 ( $\text{NO}^+$ ),  $m/z$  32 ( $\text{O}_2^+$ ) etc.. The list of 60 also included  $m/z$  42,  $m/z$  43,  $m/z$  44,  $m/z$  45,  $m/z$  46,  $m/z$  47,  $m/z$  48,  $m/z$  49,  $m/z$  55,  $m/z$  57,  $m/z$  58,  $m/z$  59,  $m/z$  60,  $m/z$  61,  $m/z$  63,  $m/z$  65,  $m/z$  67,  $m/z$  68,  $m/z$  69,  $m/z$  70,  $m/z$  71,  $m/z$  72,  $m/z$  73,  $m/z$  74,  $m/z$  75,  $m/z$  79,  $m/z$  81,  $m/z$  83,  $m/z$  85,  $m/z$  87,  $m/z$  88,  $m/z$  89,  $m/z$  91,  $m/z$  93,  $m/z$  95,  $m/z$  97,  $m/z$  99,  $m/z$  100,  $m/z$  101,  $m/z$  105,  $m/z$  107,  $m/z$  109,  $m/z$  119,  $m/z$  121,  $m/z$  123,  $m/z$  129,  $m/z$  135,  $m/z$  137,  $m/z$  149, and  $m/z$  205. This enabled us to examine also scope for any potential new interferences due to fragmentation/clustering effects or even new emissions.

### DMS identification: addressing known issues and reviewer's concerns

We undertook correlation of all other monitored  $m/z$  at which measurable signal was observed with the  $m/z$  63, but found no significant correlation ( $r^2 \leq 0.2$ ) with any of them, which suggested that fragmentation of a larger volatile detected at higher mass to charge ratio was likely not responsible for the observed  $m/z$  63 signal. Reviewer 1 raised an interesting concern about the potential for dimethyl disulfide ( $\text{CH}_3\text{SSCH}_3$ , DMDS), and dimethyl trisulfide ( $\text{CH}_3\text{SSSCH}_3$ , DMTS), fragmenting and contributing to the  $m/z$  63 signal. We note that the parent ions of these compounds would be  $m/z$  95 and  $m/z$  127. As mentioned above we did monitor  $m/z$  95 in all the seasons but didn't monitor  $m/z$  127 in the experiments after summer season as we didn't see any signal at this  $m/z$  in the output air of the cuvette. We also could not find any previous report suggesting the possibility of these compounds fragmenting to  $m/z$  63 under standard operating conditions of the PTR-MS such as 135 Td at which we operated our PTR-QMS. On the contrary, a recent relevant study conducted using both GC-MS and PTR-TOF-MS (under similar range of operating conditions; 120-140 Td) for organosulfur compounds which included these compounds (Perraud et al., 2016), showed that dimethyl disulfide ( $\text{CH}_3\text{SSCH}_3$ , DMDS), and dimethyl trisulfide ( $\text{CH}_3\text{SSSCH}_3$ , DMTS) DO NOT fragment and contribute to the  $m/z$  63 channel. Our own mass scans and analyses of correlated



masses were also consistent with these findings and so we were able to rule out the possibility of such higher compounds fragmenting and contributing to the m/z63 signal in our dataset. The issue of hydration of protonated acetaldehyde which can form the following ion:  $\text{H}^+(\text{CH}_3\text{CHO})\text{H}_2\text{O}$  (which has m/z 63) and therefore can contribute to the m/z 63 attributed to DMS indeed required careful attention as was acknowledged in our original submission too. This issue was first pointed out in the review by de Gouw and Warneke 2007 and further addressed adequately in the work by Jardine et al. 2015. The interference from this ion can be significant when both the hydrated hydronium ion and acetaldehyde concentrations are high leading to appreciable formation of  $\text{H}^+(\text{CH}_3\text{CHO})\text{H}_2\text{O}$  in the drift tube from reactions of the  $\text{H}^+(\text{CH}_3\text{CHO})$  with  $(\text{H}_3\text{O}^+\text{H}_2\text{O})$  ion. As pointed out by reviewer2 and by the work of Jardine et al. 2015, if the abundance of the hydrated hydronium ion ( $\text{H}_3\text{O}^+\text{H}_2\text{O}$ ) is therefore kept to just a few percent of the primary reagent ion namely  $\text{H}_3\text{O}^+$  ion (circa 4 %), which can be accomplished by operating at high Townsend ratios (e.g.  $\geq 135$  Td; 600 V and 2.2 mbar drift tube pressure), then at mixing ratios of less than 19 ppb acetaldehyde that occur in most ambient environments and well ventilated cuvette systems, this interference has been shown to be negligible (see for example results reported in the paper by Jardine et al. 2015, where even at acetaldehyde mixing ratios as high as 19 ppb, there was no measurable change in the m63 ion signal). We therefore took the above precaution of operating under high Townsend ratios in the drift tube to minimize conditions that favour formation of clusters ions by enhancing kinetic energy of the reagent ions. During all our experiments, acetaldehyde mixing ratios were below 12 ppb and under our operating conditions (135 Td), the average  $\text{H}_2\text{O} \cdot \text{H}_3\text{O}^+$  to  $\text{H}_3\text{O}^+$  ratio was only 4.12 % for the entire dataset which is comparable to the 4% or lower abundance during experiments conducted by Jardine et al., 2015. Our dataset was also carefully examined for indications of this potential interference biasing our measured m63 dataset. For this we plotted the 4 min averaged temporal resolution primary data for m63 ion (presented in our original submission in Fig S2) against the corresponding co-measured 4 min averaged temporal resolution primary m/z45 ion data for all the seasons.

#### Reference

Perraud, V., Meinardi, S., Blake, D. R., and Finlayson-Pitts, B. J.: Challenges associated with the sampling and analysis of organosulfur compounds in air using real-time PTR-ToF-MS and offline GC-FID, 10.5194/amt-9-1325-2016, 2016.

The results are shown in the Figure below.

**Figure 3 of response and new Figure S4: Figure S4:** Correlation of m/z63 ion signal with m/z 45 ion signal for all seasons

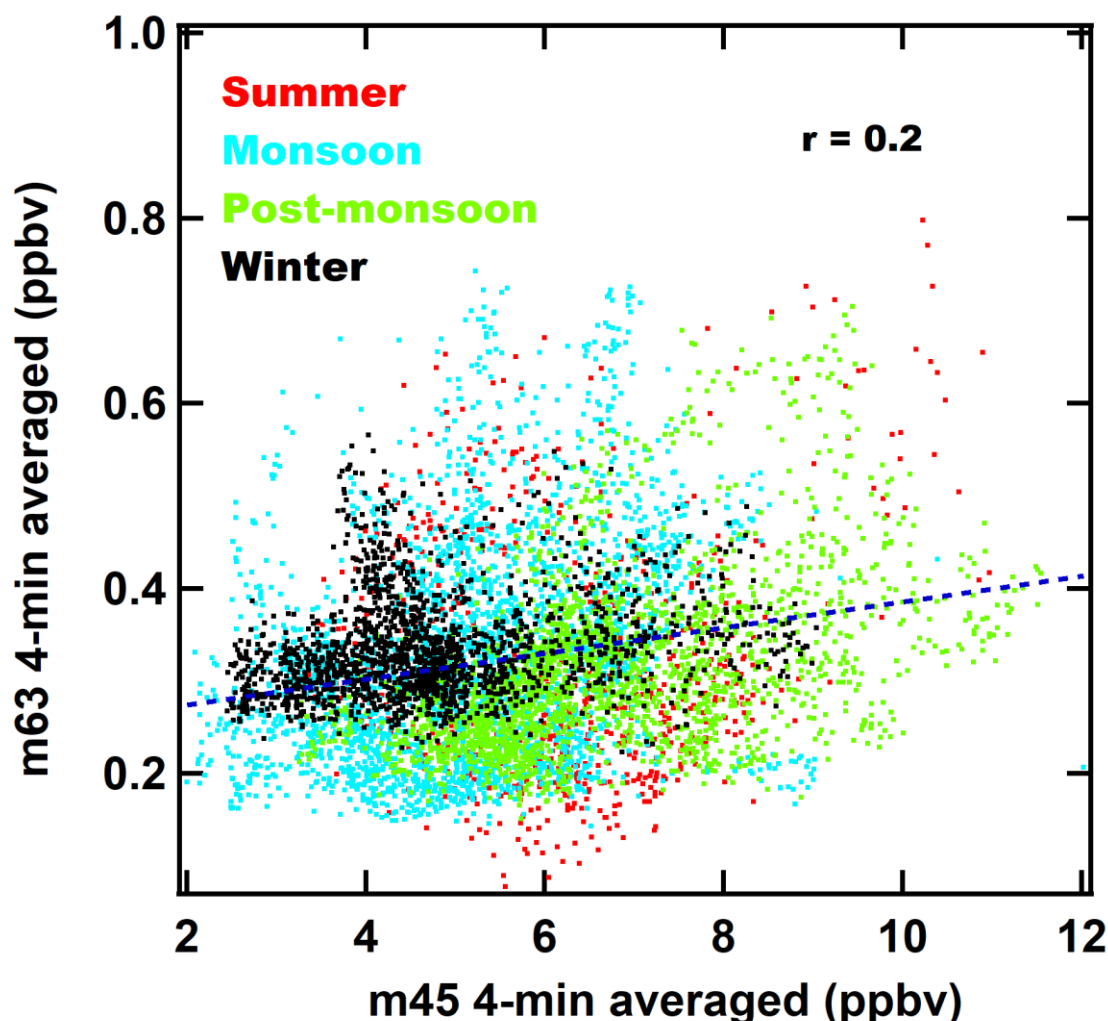

We found no significant correlation between the two ( $r = 0.22$ ) and even at high m45 mixing ratios of 10 ppb, low m63 mixing ratios of 0.2 ppb occurred frequently, which would not have been the case if the m63 originated primarily from the acetaldehyde hydrated water ion cluster. Therefore, in view of the above, just like Jardine et al. 2015, we are confident that the potential interference of acetaldehyde on the DMS data was absent/negligible.

#### Isoprene identification: addressing known issues and reviewer's concerns

We fully agree that attribution of isoprene to m69 in the PTR-MS requires careful attention and consideration of known interferences from isobaric compounds and fragments of higher ions. As mentioned in the excellent review by Yuan et al. 2017 (which we also referred to and cited in the original submission) and pointed out by the esteemed reviewers, several compounds can present substantial interferences in various environments, such as furan in biomass-burning plumes, cycloalkanes in urban environments and oil/gas regions, 2-methyl-3-buten-2-ol (MBO) in pine forests, and methylbutanals and 1-penten-3-ol from leaf-wound compounds. We examine one by one each of these possible interferences for the isoprene measurements reported in our dataset. Firstly, we note that many of the potential interferences that can affect



the m69 signal while sampling ambient air influenced by mixed combustion and biogenic sources are not relevant for our experimental set up as the output air from the branch cuvettes (after subtracting input air) is exclusively influenced by only biogenic emissions. Concerning the other biogenic emissions that could still be responsible for contributing to the m69 signal measured by the PTR-MS, actually we did carry out isoprene measurements using a TD-GC-FID system simultaneously. We did not report this TD-GC-FID data for isoprene in the original submission as during tests, variable transfer losses were suspected to have occurred in the system likely within the pre-concentration unit or during transfer from the trap to the column within the TD-GC-FID system. This prevented accurate quantification of isoprene and unfortunately, it has not been possible to correct for these effects reliably. Nonetheless, even the semi-quantitative data is useful and sufficient to show that the air from the branch cuvette contained isoprene. Below we show the chromatographic peak for isoprene from the output air of the branch cuvette system identified based on the retention time of isoprene vapours that were sampled under identical operating conditions with the TD-GC-FID. The isoprene data co-measured with the TD-GC-FID for the monsoon season along with the isoprene data measured with the PTR-QMS, was found to have excellent correlation of the PTR-MS isoprene signal but the absolute values were much lower due to the suspected losses within the TD-GC-FID system. When combined with the observed diurnal variability of the m69 signal with PAR and temperature, and these additional observations using the TD-GC-FID, therefore we could not identify any known compound other than isoprene that could satisfy all the above criteria. Hence m/z 69 was confidently assigned to isoprene.

Figure 4 of response and new Figure S5: Sample chromatogram of the isoprene peak resolved on the Alumina PLOT column at a retention time of 37.5min in the air collected from the plant chamber experiment overlayed with the peak from pure isoprene vapours injected to determine the retention time of isoprene.

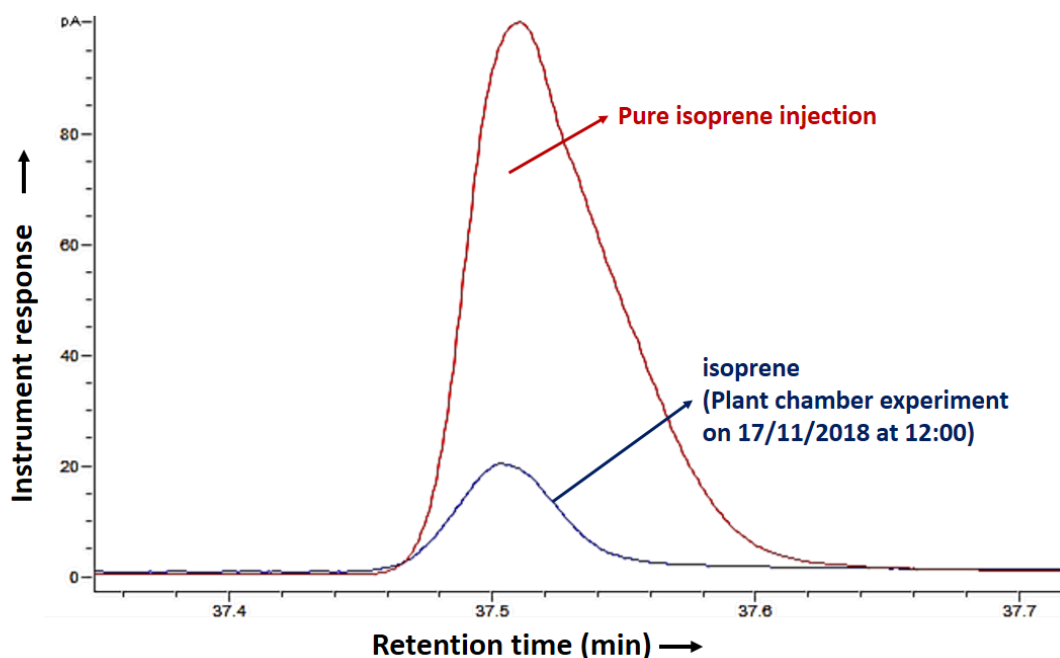

Figure 5 of response and new Figure S6. Times series of hourly averaged isoprene measurements from PTR-MS and TD-GC-FID for monsoon season

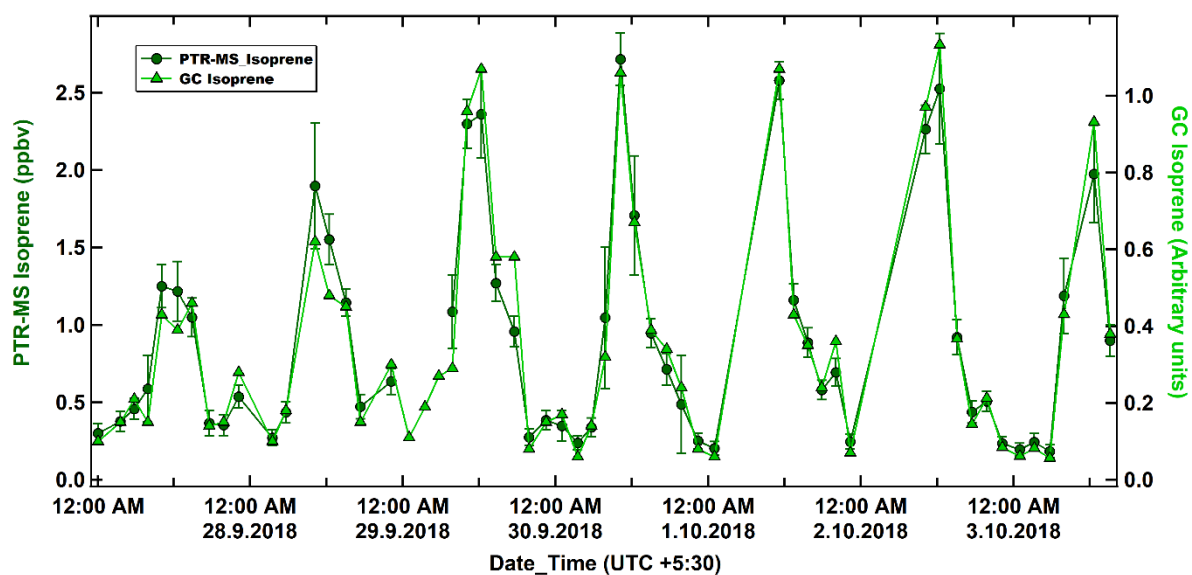

Figure 6 of response and new Figure S7. Correlation of hourly averaged isoprene measurements from PTR-MS and TD-GC-FID for monsoon season

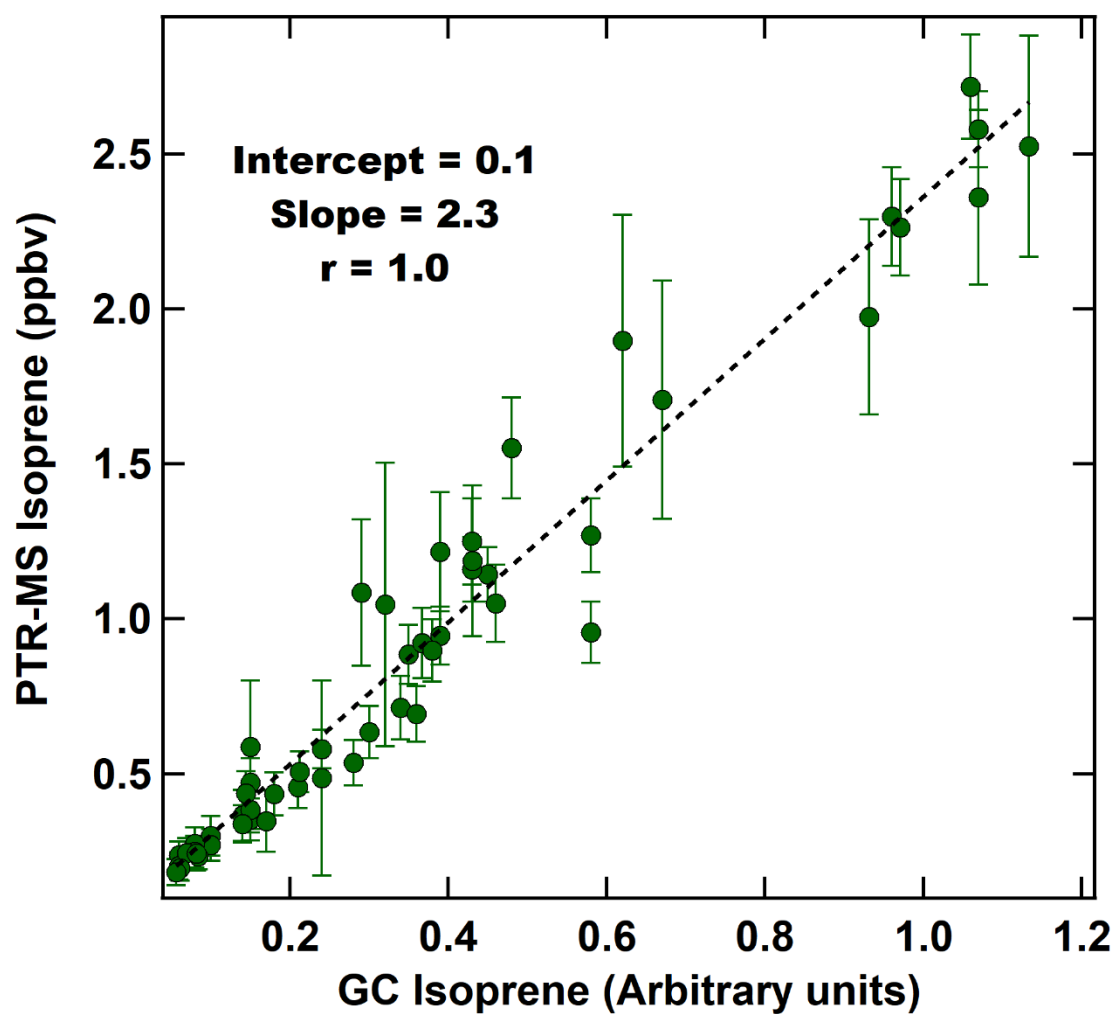

**We have now added all this information to revised manuscript and the supplement as follows:**

**Added to revised manuscript are the following new paragraphs to Section 2.2 entitled Isoprene, monoterpene, dimethyl sulphide and carbon dioxide measurements :**

*“In the next few paragraphs, we provide a detailed description about the steps we took to account for potential interferences concerning identification of DMS, isoprene and the sum of monoterpenes using our PTR-QMS.*

*When we commenced the first set of plant cuvette measurements in summer we undertook mass scans for the input air and output air into the branch cuvette over the entire mass range of ( $m/z$  21-  $m/z$  210) during the experiments. We found that in comparison to the ambient air, the mass scans contained very few peaks and the spectra was remarkably simple (see Fig S3). The results of these mass scans formed the basis for our choice of what masses to monitor in subsequent plant chamber experiments in other seasons from the same tree. Despite the simple spectra obtained in our mass scan results during summer, for subsequent experiments conducted in the selected ion monitoring (SIM) mode in other seasons, we still monitored 60  $m/z$  channels of interest keeping in mind the PTR-MS literature for BVOC emissions, major atmospheric VOCs, and abundant ions formed generally due to the ion chemistry in the PTR-MS drift tube, which include impurity ions such as  $m/z$  30 ( $\text{NO}^+$ ),  $m/z$  32 ( $\text{O}_2^+$ ) etc.. . The list of 60 also included  $m/z$  42,  $m/z$  43,  $m/z$  44,  $m/z$  45,  $m/z$  46,  $m/z$  47,  $m/z$  48,  $m/z$  49,  $m/z$  55,  $m/z$  57,  $m/z$  58,  $m/z$  59,  $m/z$  60,  $m/z$  61,  $m/z$  63,  $m/z$  65,  $m/z$  67,  $m/z$  68,  $m/z$  69,  $m/z$  70,  $m/z$  71,  $m/z$  72,  $m/z$  73,  $m/z$  74,  $m/z$  75,  $m/z$  79,  $m/z$  81,  $m/z$  83,  $m/z$  85,  $m/z$  87,  $m/z$  88,  $m/z$  89,  $m/z$  91,  $m/z$  93,  $m/z$  95,  $m/z$  97,  $m/z$  99,  $m/z$  100,  $m/z$  101,  $m/z$  105,  $m/z$  107,  $m/z$  109,  $m/z$  119,  $m/z$  121,  $m/z$  123,  $m/z$  129,  $m/z$  135,  $m/z$  137,  $m/z$  149, and  $m/z$  205. This enabled us to examine also scope for any potential new interferences due to fragmentation/clustering effects and/or new emissions.*

*To rule out the possibility of any higher compounds fragmenting and contributing to the  $m/z$  63 signal in our dataset, we undertook correlation of all other monitored  $m/z$  at which measurable signal was observed with the  $m/z$  63, but found no significant correlation ( $r^2 \leq 0.2$ ) with any of them, which suggested that fragmentation of a larger volatile detected at higher mass to charge ratio was likely not responsible for the observed  $m/z$  63 signal. In particular, concerning the potential for other sulphur containing compounds such as dimethyl disulfide ( $\text{CH}_3\text{SSCH}_3$ , DMDS), and dimethyl trisulfide ( $\text{CH}_3\text{SSSCH}_3$ , DMTS), fragmenting and contributing to the  $m/z$  63 signal, we would like to note that the parent ions of these compounds would be detected at  $m/z$  95 and  $m/z$  127. As mentioned above we did monitor  $m/z$  95 in all the seasons but didn't monitor  $m/z$  127 in the experiments after summer season as we didn't see any signal at this  $m/z$  in the output air of the cuvette. We also could not find any previous report suggesting the possibility of these compounds fragmenting to  $m/z$  63 under standard operating conditions of the PTR-MS such as 135 Td at which we operated our PTR-QMS. On the contrary, a recent relevant study conducted using both GC-MS and PTR-TOF-MS (under similar range of operating conditions; 120-140 Td) for organosulfur compounds which included these compounds (Perraud et al., 2016), showed that dimethyl disulfide ( $\text{CH}_3\text{SSCH}_3$ , DMDS), and dimethyl trisulfide ( $\text{CH}_3\text{SSSCH}_3$ , DMTS) do not fragment and contribute to the  $m/z$  63 channel, at which DMS is detected. Our own mass scans and correlation analyses are also consistent with these findings and so we were*

able to rule out the possibility of such higher compounds fragmenting and contributing to the  $m/z$  63 signal in our dataset.

The issue of hydration of protonated acetaldehyde which can form the following ion:  $H^+ (CH_3CHO) H_2O$  (which has  $m/z$  63) and therefore could contribute to the  $m/z$  63 attributed to DMS required careful attention. This issue was first pointed out in the review by de Gouw and Warneke 2007 and further addressed adequately in the work by Jardine et al. 2015. The interference from this ion can be significant when both the hydrated hydronium ion and acetaldehyde concentrations are high leading to appreciable formation of  $H^+ (CH_3CHO) H_2O$  in the drift tube from reactions of the  $H^+ (CH_3CHO)$  with  $(H_3O^+ H_2O)$  ion. As shown in the work of Jardine et al. 2015, if the abundance of the hydrated hydronium ion ( $H_3O^+ H_2O$ ) is therefore kept to just a few percent of the primary reagent ion namely the  $H_3O^+$  ion (circa 4 %), then at mixing ratios of less than 19 ppb acetaldehyde that occur in most ambient environments and well ventilated cuvette systems, this interference has been shown to be negligible (see for example results reported in the paper by Jardine et al. 2015, where even at acetaldehyde mixing ratios as high as 19 ppb, there was no measurable change in the  $m/z$  63 ion signal). We therefore took the above precaution of operating under high Townsend ratios ( $\sim 135$  Td) in the drift tube to minimize conditions that favour formation of clusters ions by enhancing kinetic energy of the reagent ions. During all our experiments, acetaldehyde mixing ratios were below 12 ppb and under our operating conditions (135 Td), the average  $H_2O \cdot H_3O^+$  to  $H_3O^+$  ratio was only 4.12 % for the entire dataset which is comparable to the 4% or lower abundance during experiments conducted by Jardine et al., 2015. Our dataset was further carefully examined for indications of this potential interference biasing the measured  $m/z$  63 attribution to DMS. For this we plotted the 4 min averaged temporal resolution primary data for  $m/z$  63 ion against the corresponding co-measured 4 min averaged temporal resolution primary  $m/z$  45 ion data for all the seasons. The results are shown in Figure S4, where it can be seen that there was no significant correlation between the two ( $r = 0.22$ ) and even at high  $m/z$  45 mixing ratios of 10 ppb, low  $m/z$  63 mixing ratios of 0.2 ppb occurred frequently, which would not have been the case if the  $m/z$  63 originated primarily from the acetaldehyde hydrated water ion cluster. Therefore, in view of the above, just like Jardine et al. 2015, we are confident that the potential interference of acetaldehyde on the DMS measurements was absent/negligible.

The attribution of isoprene to  $m/z$  69 also requires careful attention and consideration of known interferences from isobaric compounds and fragments of higher ions. As mentioned in the excellent review by Yuan et al. 2017, several compounds can present substantial interferences in various environments, such as furan in biomass-burning plumes, cycloalkanes in urban environments and oil/gas regions, 2-methyl-3-buten-2-ol (MBO) in pine forests, and methylbutanals and 1-penten-3-ol from leaf-wound compounds. We examine one by one each of these possible interferences for the isoprene measurements reported in our dataset. Firstly, we note that many of the potential interferences that can affect the  $m/z$  69 signal while sampling ambient air influenced by mixed combustion and biogenic sources are not relevant for our experimental set up as the output air from the branch cuvettes (after subtracting input air) is exclusively influenced by only biogenic emissions. Concerning the other biogenic emissions that could still be responsible for contributing to the  $m/z$  69 signal measured by the PTR-MS, we could identify isoprene as the main contributor based on isoprene measurements in the output air of the cuvette obtained using a Thermal Desorption- Gas Chromatography-Flame Ionization Detector (TD-GC-FID) system simultaneously. Even though the data was semi-quantitative due to suspected transfer losses noted subsequently within the GC system, they adequately prove that the air from the branch cuvette contained isoprene. Details of the chromatographic detection of isoprene (Figure S5) time series (Figure S6) and its correlation ( $r = 1$ ) (Figure S7) with the measured  $m/z$  69 signal in the PTR-QMS for the monsoon season are provided in the supplement. When combined with

*the observed diurnal variability of the m/z 69 PTR-MS signal with PAR and temperature, and these additional observations using the TD-GC-FID, it is clear that no other known compound other than isoprene could satisfy all the above criteria. Hence m/s 69 was confidently attributed to isoprene.*

*The sum of monoterpenes can be detected using the PTR-QMS technique collectively at m/z 81 (major fragment ion) and m/z 137 with the typical fragmentation ratio ranging from 60-65 % at m/z 81 and 40-35% at m/z 137, depending on the structure of the major monoterpenes that contribute to the sum of the monoterpenes. For alpha-pinene, during our calibration experiments we found that at under the conditions we operated our PTR-MS (~135 Td), 65% of the signal landed at m/z 81 and 35% at m/z 137. As we cannot rule that the major monoterpene emitted from Mahogany trees is not alpha-pinene, we chose to take the sum of m/z 81 and m/z 137 signals for quantifying the monoterpenes, instead of only m/z 137. Of course while doing so, one has to check that other isobaric ions due to compounds that are not monoterpenes do not contribute majorly to m/z 81. For this we examined the correlation between observed m81 and m137 signals from the plant chamber output air for all seasons. The results showed that m/z 81 originating from some ion other than m137, was unlikely (r=1 between m/z 137 and m/z 81) for all seasons (see in Figure S8). The near perfect correlation also suggests that the composition of the monoterpenes was not different from one season to another because if different monoterpenes with different fragmentation ratios between m81 and m137 were emitted, all the points would not lie on the same line. The isotopic shoulder peaks (m/z 82 and m/z 138 due to natural C-13 abundance) shown in the mass spectra (Figure S3) were also consistent with ions originating from monoterpenes. Hence we could attribute the observed m/z 81 and m/z 137 ions to sum of monoterpenes emitted by Mahogany.”*

**Added to supplement are following text and Figures 2 to 6 of this response:**

*Isoprene measurements by Thermal Desorption-Gas Chromatography-Flame Ionization Detector (TD-GC-FID):*

*Isoprene was detected in output air from the branch cuvette using a gas chromatograph equipped with a flame ionization detector (GC-FID 7890B, Agilent Technologies, Santa Clara, United States) which is coupled to a thermal desorption unit (CIA Advantage-HL and Unity 2, Markes International, UK) for sampling and pre-concentration. Water in the sample air was removed using a nafion dryer which also removed the oxygenated VOCs such as alcohols, aldehydes and ketones (Badol et al., 2004; Gros et al., 2011). 1000ml of dry sample air was pre-concentrated at -30°C at 20 mL/min on an ozone precursor trap (U-T17O3P-2S, Markes International, UK) which was then thermally desorbed by rapid heating to 325°C. The desorbed analytes were then transferred onto the GC instrument via a heated inlet (130°C) line. The GC instrument consisted of a capillary column (Alumina Plot, Al<sub>2</sub>O<sub>3</sub>/Na<sub>2</sub>SO<sub>4</sub>, 50m x 0.32mm, 8 µm film thickness, Agilent Technologies, Santa Clara, United States). The oven temperature was ramped from 30°C (hold for 12 min) to 200°C at the rates of 5°C/min (upto 170°C) and 15°C/min (upto 200°C) for resolving the peaks.*

*Isoprene was resolved on Alumina PLOT column at a retention time of 37.5min and identified based on the retention time of isoprene vapours injected into the TD-GC-FID system under identical instrument operational conditions as the sample. The eluted isoprene was then detected using the FID. Unfortunately due to the suspected transfer losses within the GC system, which could not be corrected, the data is only semi-quantitative and hence reported in arbitrary units.*

**References:**

Badol, C., Borbon, A., Locoge, N., Léonardis, T., and Galloo, J.-C.: An automated monitoring system for VOC ozone precursors in ambient air: development, implementation and data analysis, *Analytical and bioanalytical chemistry*, 378, 1815-1827, <https://doi.org/10.1007/s00216-003-2474-0>, 2004.

Gros, V., Gaimoz, C., Herrmann, F., Custer, T., Williams, J., Bonsang, B., Sauvage, S., Locoge, N., d'Argouges, O., and Sarda-Estève, R.: Volatile organic compounds sources in Paris in spring 2007. Part I: qualitative analysis, *Environmental Chemistry*, 8, 74-90, <https://doi.org/10.1071/EN10068>, 2011.

*New Figure S8: Correlation between observed m81 and m137 signals from the plant chamber output air for all seasons*

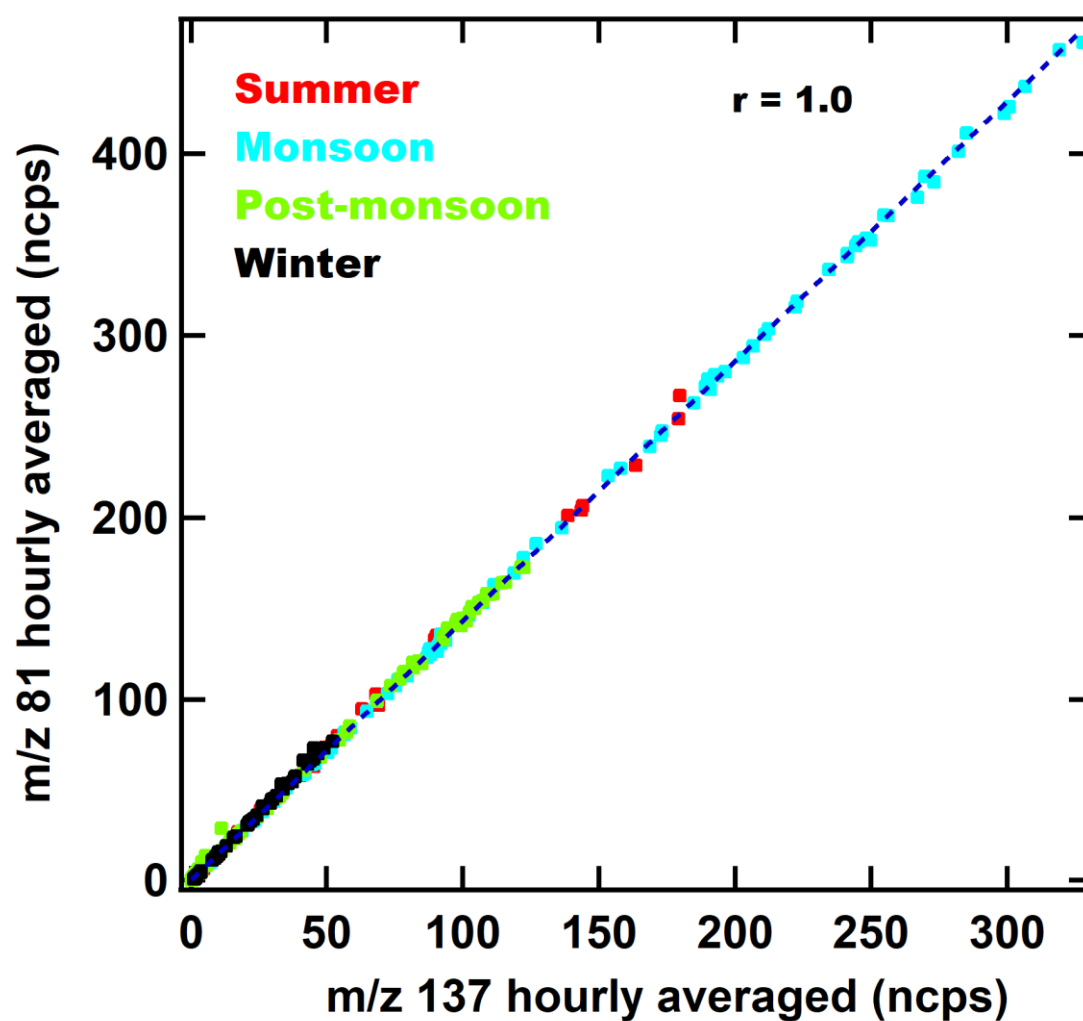



3) Estimation of the global annual emission of BVOCs from Mahogany: This part is very interesting but there is a fundamental contradiction. The authors state that the biomass data available (global distribution of Mahogany trees) is “by no means comprehensive” P9L27-31. So, it is unclear why the global BVOC estimations are then “meaningful”.

**Reply:** Thank you for appreciating our effort in the estimation of global annual emission of BVOCs from Mahogany. We apologise for the confusion caused by ill choice of words. We would like to clarify that as presented in Table 3 of the original submission, which lists the peer reviewed literature used for assessing the biomass, the global BVOC estimates are comprehensive. Overall the discussion and analysis concerning the global annual emissions are quite meaningful for assessing which areas/regions of the world this hitherto unreported source may have significant impacts on for atmospheric chemistry and air quality through biogenic emissions, and therefore provide guidance for planning future BVOC emissions field studies in some of these understudied regions such as South America and Indonesia.

*Thanks to the reviewer’s comment however we now realize that “by no means comprehensive” is misleading and we have rephrased P9L27-31 which now reads as follows:*

*“We would like to point out that this estimate is based on the current available information but there may be some underestimation as there are some areas where cultivation of Mahogany trees is known to occur (e.g. Jim Corbett national park in India), for which, however, accurate Mahogany biomass estimates are not available and which hence were not included in Table 3.”*

4) Overall there is a lack of statistical analysis. When comparing the temperature and light intensities of the different season, are those significantly different? And the corresponding BVOC emissions? These and further data should be supported by appropriate statistical analysis.

**Reply:** Thank you for this valuable feedback. We now add the results of the statistical analyses as follows: We performed the Kruskal-Wallis test since it is a robust way to compare two or more independent samples of different sizes. From this test we see that the temperature ( $p < 0.01$ ) and light intensities ( $p < 0.01$ ) of the different season, and the corresponding BVOC emissions ( $p < 0.01$ ) are significantly different at a significance level of more than 3 sigma.

*We have rephrased P6L29-31 of the original submission as follows:*

*“Average temperatures were highest in summer ( $\sim 35 \pm 5$  °C), followed by the monsoon ( $\sim 30 \pm 8$  °C), post-monsoon ( $\sim 21 \pm 7$  °C) and winter season ( $\sim 13.5 \pm 7$  °C). Peak hourly PAR ranged from  $0-1200 \mu\text{mol m}^{-2}\text{s}^{-1}$  in all seasons except the post-monsoon where maximum hourly values remained below  $900 \mu\text{mol m}^{-2}\text{s}^{-1}$  on all days of sampling. The Kruskal-Wallis test results revealed that the temperature ( $p < 0.01$ ) and light intensities ( $p < 0.01$ ) in different seasons, as well as the corresponding BVOC emissions ( $p < 0.01$ ) are significantly different at 99 % confidence interval or more.”*

5) Relative humidity: it is necessary for the reader to see the humidity data along with figure 1, essential when comparing Monsoon with post-Monsoon data.

**Reply: Done.**

In response to the reviewer’s suggestion we have added it to the revised Figure 1 (new Figure 2) as shown below:

**Figure 7 of response and new Figure 2.** BVOC emission fluxes along with PAR, temperature, RH. (expressed in nanomols or picomols per leaf area per second). R: Reproductive growth phase V: Vegetative growth phase.

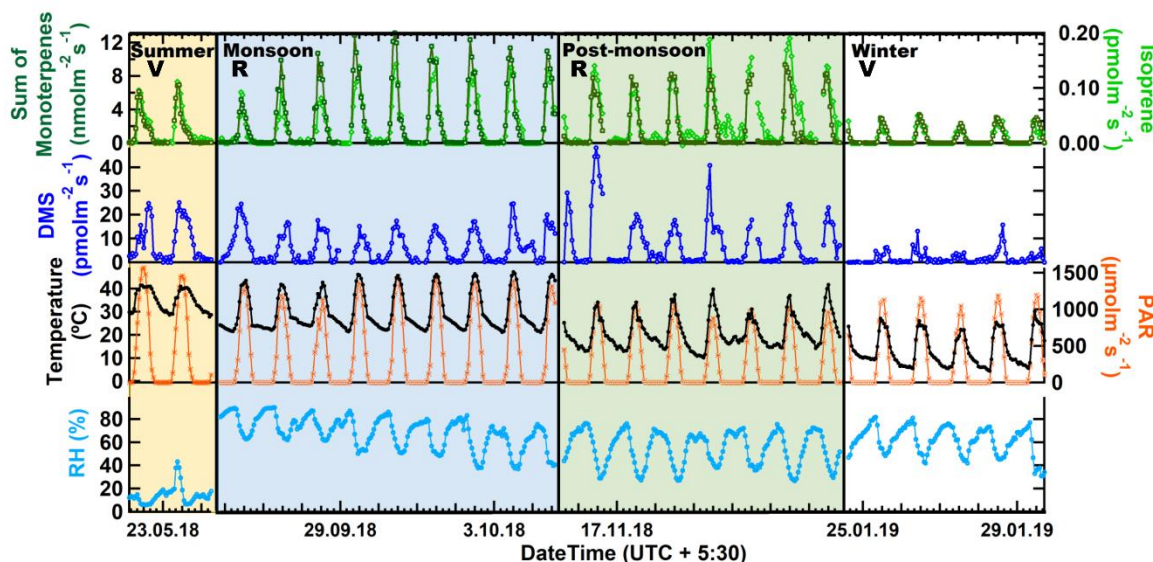

6) Seasonality: To describe inter-seasonal variability of BVOC emissions, the authors seem to have used one single tree (n=1). This is not scientifically acceptable. It is unclear how reproducible the experiment is and what is the intra-species variance of BVOC emissions. Either the experiments are performed with more replicates (at least n=3), or the data should be removed from the manuscript.

**Reply:** We have already addressed this concern in detail and also revised the submission to address these concerns while replying to point 1, which was along similar lines. May kindly refer to the same.

7) Seasonality: to describe the seasonal change of BVOC emissions, the authors have performed the measurements during summer, fall (during and post-monsoon) and winter. Why did they not consider spring? The tree phenology strongly changes in spring, which is known as an important player in changing the seasonality of BVOC emissions (e.g. (Fischbach et al., 2002; Noe et al., 2012; Grote et al., 2014; Vanhatalo et al., 2018)).

**Reply:** We appreciate the reviewer's comments and points. However, we would like to point out that in contrast to the temperate and boreal environments where "spring" season is long and represents a distinct transition between winter and summer, in the sub-tropical climate for the species *Swietenia macrophylla*., this period lasts only for about 2-3 weeks wherein the Mahogany tree sheds its old leaves and grows the new leaves simultaneously. We did not measure during this period because 1) having fallen leaves/ leaf litter inside the chamber, which occurs as old leaves fall off would confound the emissions from leaves with leaf litter emissions. 2) accounting for the leaf dry weight or LAI at a time when some leaves fall and new ones replace it was also considered logistically difficult and not worth the effort. Please find below some pictures from our experiments which exhibit the changing leaf phenology during the different seasons.

**Figure 8 of response .** Pictures from the plant chamber experiments which capture the changing leaf phenology during the different seasons

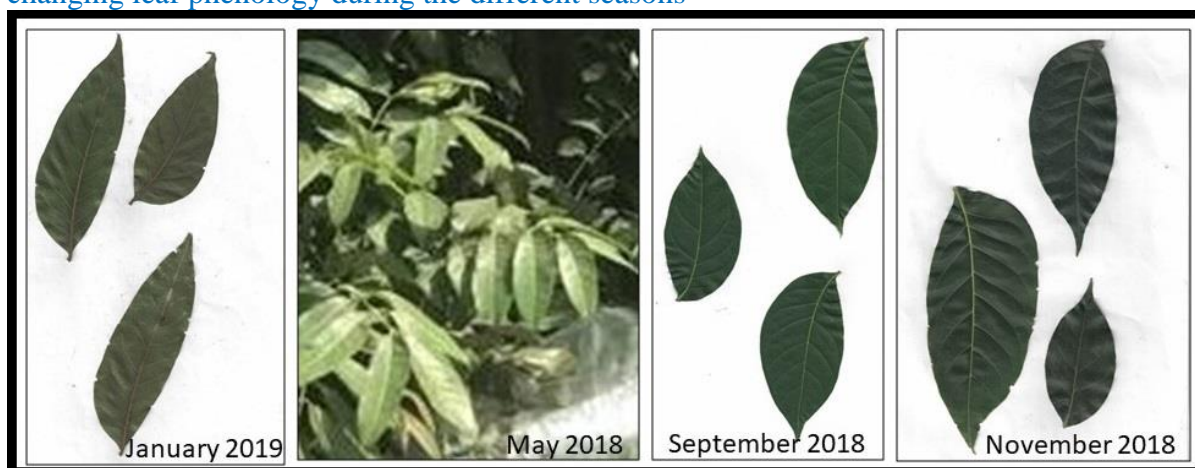

We note that in summer these leaves were still relatively young. While the reviewer's points are well taken and indeed ideally one should be measuring the full year from at least three different replicates sequentially with three identical chambers and sensors on all of them, in such experimental work, conditions and resources always limit how much can be done. As appreciated by reviewer 2, we still think our dataset has sufficient novelty and several new findings. Future work can certainly build on these first measurements from *Sweetenia macrophylla* King commonly called Mahogany.

**8) Seasonality:** I find two days of measurements of one unique tree, not representative for describing seasonal emission during summer.

**Reply:** We have already addressed this concern in reply to point 1 as far as replicates are concerned where we also noted that in the pioneering study by Jardine et al. 2015, there were also sometimes only 4 days of measurements from a single tree.

We appreciate the reviewer's concern about 2 days of data because if the meteorological in these two days were not representative of summertime, then the emission data may not be representative. We note that the summertime measurements were performed for 52 hours without any break (1 cycle of measurements scanning from m/z 21 to m/z 210 took 3 minutes, so the primary data in fact consists of ~ 780 measurements) after which we had to stop the PTR-MS measurements due to technical issues related to dirty power. The meteorological data of these 52 hours were comparable to typical summer time conditions (low daytime RH and high temperature and PAR) as can be seen from Figure 9 of the response shown below.

We argue therefore that these 52 hours can be taken to represent normal summertime conditions, especially when several previous BVOC emission studies could rely only on offline sample collections few times a day, but still yielded meaningful data and findings.

**Figure 9 of response.** Meteorological conditions in terms of PAR, Temperature and Relative Humidity (RH) during summer before and after the period of the plant chamber experiments during summer (shown as shaded region in the middle)

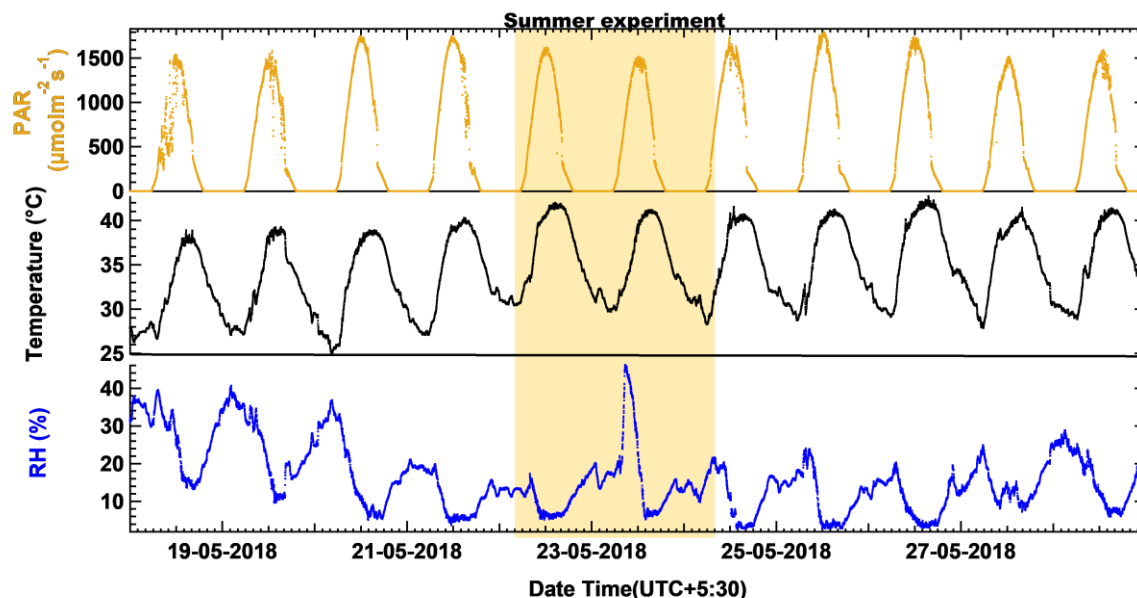

In the revised version, we clarify the same at Page 7 after line 1 of the original submission as follows:

*“The summertime measurements were performed only for 52 hours, but comparison of the meteorological data for this period with the meteorological data before and after the sampling period showed that the sampling was carried out under conditions characteristic of the typical summer time conditions (low daytime RH and high temperature and PAR).”*

9) Methods: it appears that the authors did not make any background correction using empty cuvette. To correctly calculate the BVOC fluxes, background measurements are necessary for taking into account the chemical noise of the cuvette system. However, this point does not seem to be critical since the emissions go to nearly zero during the night. However, data should be corrected before publication.

**Reply:** We did perform experiments to assess emissions from the empty cuvette as well as characterize the transmission of PAR through its material while setting up the experiment. In these experiments we did not detect any contamination/emission from the cuvette at the reported BVOC channels ( $m/z$  63,  $m/z$  69,  $m/z$  81 and  $m/z$  137). The relevant data is shown in Figure 10 of the response below.

In addition, we did subtract the input air into the branch cuvette and considered this as the background for calculating the fluxes as shown in Equation 1. The latter correction would account for contributions to the observed data due to temporal changes in the scrubber efficiency and the PTR-MS instrumental background at these ion detection channels.

**Figure 10 of response.** Example of experimental results showing the background mixing ratios at  $m/z$  63,  $m/z$  69 and sum of  $m/z$  81 and  $m/z$  137 from the empty cuvette even in the afternoon when the cuvette experiences maximum heating.

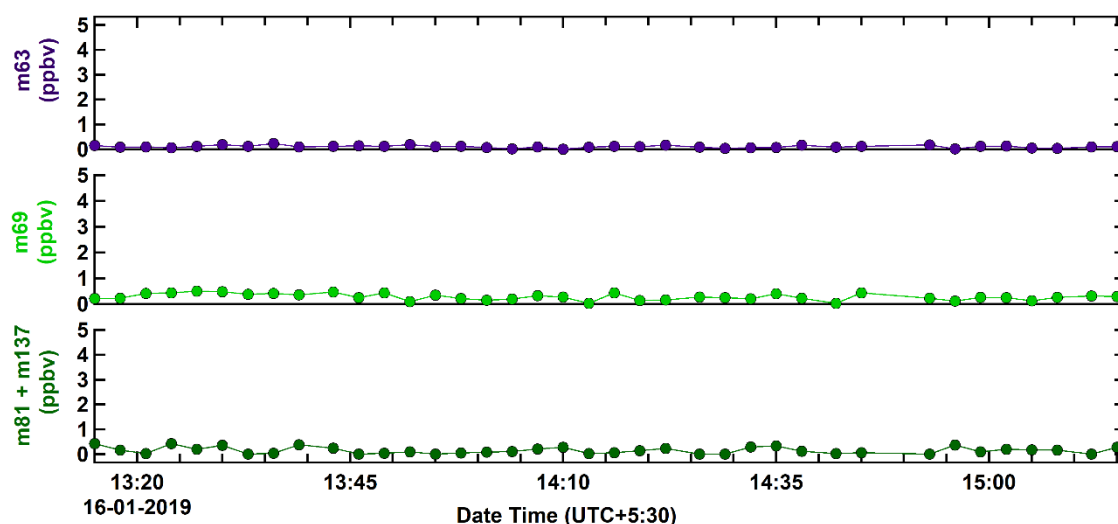

10) Table1: what are the variability of the data?

**Reply:** Thank you for once again raising this pertinent point about variability, which we missed out on providing in the original submission. As already noted in reply to point 1 we have revised Table 1 of original submission (which is now Table 2 of the revised submission), to include the variability (1 sigma standard deviation) for the seasonally averaged fluxes, and report the average flux from all four trees for winter. Changes to the revised manuscript have already been detailed in reply to point 1 of the reviewer.

11) Table1: In the last column, what do “5” and “10” refer to?

**Reply:** We apologize for the confusion. The last column “5” and “10” are the line numbers that got added while formatting the original submission. These will no longer appear in the revised MS.

12) Table2: why the function is different between “vegetative” and “reproductive” phase? This makes the comparison difficult. And what is the working hypothesis behind the use of these 2 functions? If available, please cite relevant literature. Overall the rationale is not described.

**Reply:** The functions are different because the magnitude of BVOC emissions and their dependence of PAR and temperature differs depending on whether the tree is in the vegetative phase or the reproductive phase. This can be noted from the Figure shown below (Figures 11 of response), which show the dependence of BVOC emission fluxes in both phases with PAR and why distinguishing the two phases is meaningful. In the vegetative phase (summer and winter), there is an exponential dependence of the fluxes with PAR whereas in reproductive phase (the time when the tree is flowering and fruiting), there is a linear dependence.

**Figure 11 of response:** Dependence of BVOC emission fluxes in reproductive and vegetative growth phase with PAR.



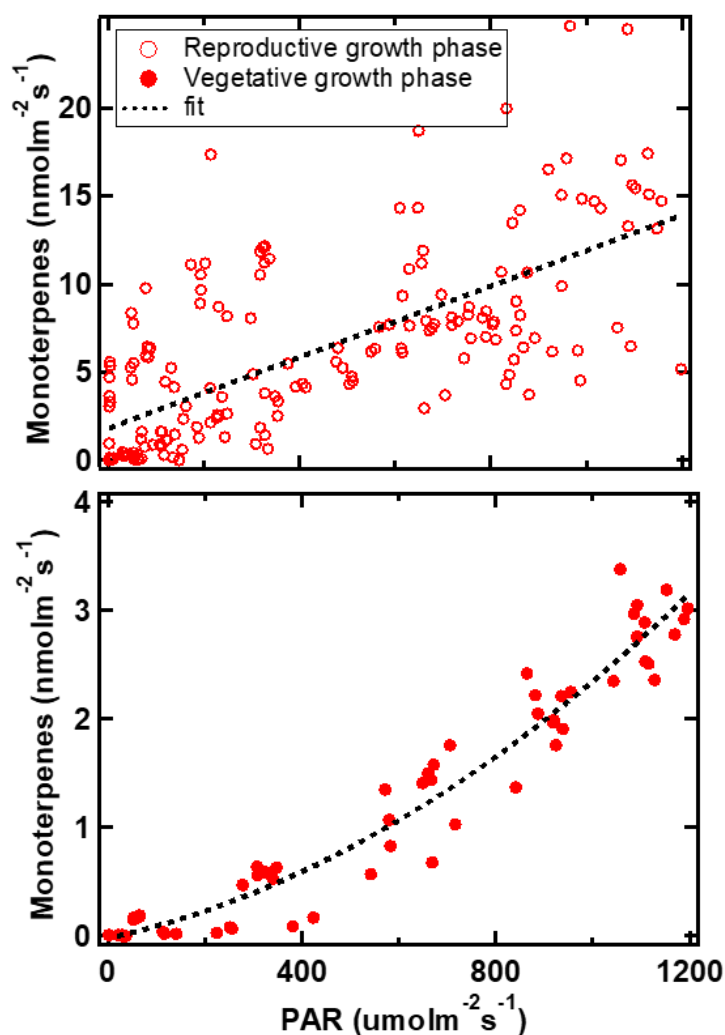

We respectfully disagree that the rationale was not described. The relevant text in lines 2- 12 at Page 8 of the original submission which appear two paragraphs before Table 2 was discussed in the text, also included citations to the relevant references and are reproduced below for convenience:

“Further, depending on whether the tree’s growth is in the reproductive or vegetative phase, the assimilated carbon can be allocated differently impacting the emitted BVOC flux. For example, one could expect that in the vegetative growth phase, emissions of BVOCs would be lower whereas, in the reproductive phase, when flowering and fruiting occur, due to the important functional roles BVOCs play in attracting pollinators and for plant defence, there would be increased emissions of BVOCs (Peñuelas, 2003). Mahogany is known to bear fruits during the monsoon season (Gullison et al., 1996) and trees emit odorous compounds like terpenes for defence purposes especially against herbivores and abiotic stresses like high-intensity light, temperature. This diversion of the carbon allocation for such purposes can decrease growth by diverting photosynthates from the production of vegetative structures (Herms and Mattson, 1992). Henceforth, the two distinct phases are referred to as the vegetative growth phase when the carbon allocation to BVOC synthesis is low and reproductive growth phase, when the carbon allocation by the tree to synthesize BVOCs is high.”

We have now added the additional reference to make this even more clear.

*“Further, depending on whether the tree’s growth is in the reproductive or vegetative phase (Huijser & Schmid 2011), [...]”*



Reference: Huijser, P. and Schmid, M., The control of developmental phase transitions in plants, *Development* 138, 4117-4129 (2011) doi:10.1242/dev.063511

In consideration to reviewer 2's suggestion, we have now also renamed the variables for the Reproductive phase modeling fn which was  $f(T, PAR) = a * PAR + b * \exp(c * T)$  to  $f(T, PAR) = a * PAR + c * \exp(d * T)$  for easier comparison with the vegetative phase modeling fn and revised Table 2 of the original submission (now Table 3) is as shown below:

**Table 3. Bivariate fit functions and their coefficients for BVOC flux parameterizations as function of PAR and temperature in both the reproductive and vegetative phases of Mahogany**

| Vegetative phase modeling fn:                     |      |         |          |      | Reproductive phase modeling fn:         |        |       |      |
|---------------------------------------------------|------|---------|----------|------|-----------------------------------------|--------|-------|------|
| $f(T, PAR) = a * \exp(b * PAR) + c * \exp(d * T)$ |      |         |          |      | $f(T, PAR) = a * PAR + c * \exp(d * T)$ |        |       |      |
|                                                   | a    | b       | c        | d    |                                         | a      | c     | d    |
| Monoterpenes                                      | 0.14 | 0.003   | 0.27     | 0.10 | Monoterpenes                            | 0.009  | 0.66  | 0.01 |
| Isoprene                                          | 0.01 | 0.002   | 0.000008 | 0.20 | Isoprene                                | 0.0001 | 0.003 | 0.05 |
| DMS                                               | 1.89 | 0.00001 | 0.02     | 0.16 | DMS                                     | 0.01   | 5.89  | 0.01 |

**13)** It is unclear the calibration procedure used for VOC quantification. Which molecules have been used for the calibration of the PTRMS? Was the standard mixture passing throughout the whole cuvette and canister system during calibration? If the authors have calculated the compounds-specific sensitivities, why did they sum up m/z 81+137 for monoterpene measurements?

**Reply:** We did include this information briefly on Page 6, Lines 6-16 of the original submission and also provided reference to the previous works from our group where we reported the detailed characterization of the instrument, its long term stability, QA/QC of measurements and calibration protocol (Line 1-2; Page 6):

“The instrument has been previously characterized in detail elsewhere (Sinha et al., 2014; Chandra et al., 2017; Kumar et al., 2018).”

However, appreciating the reviewer's comment, we now present details of the calibration procedure, VOC gas standard and calibration experiments as follows:

*This information has now been added to Section 2.2 as the following additional text:*

*“Compound-specific sensitivities (ncps ppb<sup>-1</sup>) were determined using calibration experiments involving dynamic dilution of a VOC gas standard (Apel–Riemer Environmental, Inc., Colorado, USA; containing thirteen VOCs at circa 500 ppb; details provided in Table S1) on 4 May 2018, 4 October 2018, 14 November 2018 and 22 January 2019. The pre-mixed VOC gas standard (Apel–Riemer Environmental, Inc., Colorado, USA) contained 495 ppb of dimethyl sulphide (detected at m/z 63), 483 ppb of isoprene (detected at m/z 69) and 494 ppb of the monoterpene  $\alpha$ -pinene (detected at m/z 137 and m/z 81 after fragmentation). The stated accuracy of the VOC standard was 5% for all these compounds and as stated in the manufacturer's certificate several of the compounds remain stable even beyond the one year period mentioned in the certificate. We also verified the same for DMS, isoprene and alpha-*

pinene by comparison with newer VOC gas standards for which the certificate was still valid and is a standard practice in our laboratory to keep track of any changed concentrations inside the VOC standard after the expiry date (see for e.g. Table S1 of Sinha et al., 2014). The gas standard was dynamically diluted with VOC free-zero air generated using a Gas Calibration Unit (GCU-s v2.1, Ionimed Analytik, Innsbruck, Austria). The flows of both the standard gas and zero air mass flow controllers were measured independently before and after the calibration experiments using a NIST calibrated flow meter (BIOS Drycal definer 220, Mesa Labs, US). Figure S2 presents data from two calibration experiments conducted on 4 May 2018 and 4 October 2018, that show there was very little drift in sensitivity of the PTR-QMS for the three compounds (DMS < 3.8%; isoprene < 4.1 % and alpha-pinene < 6.1 %) even over a period spanning 5 months. The uncertainties were calculated using the root mean square propagation of individual uncertainties including the instrumental precision error, 5% accuracy error inherent in the VOC gas standard and 2% precision error of the MFCs as explained in Sinha et al. 2014. For offline measurements, the standard deviation associated with the average value obtained for each canister measurement already included the instrumental precision error and mass flow controller precision errors. The procedure for calculation of the uncertainties in mixing ratios and emission fluxes has been outlined in the supplement. Table S2 lists the sensitivity factor, limit of detection, instrumental uncertainty and total measurement uncertainty for isoprene, DMS and sum of monoterpenes. The total measurement uncertainty was found to be less than equal to 13% for isoprene, DMS and sum of monoterpenes also accounting for the instrumental background (determined by sampling VOC free air) at these m/z ratios.”

New Table S1:

Table S1: Details of the VOC gas standard (Apel–Riemer Environmental, Inc., Colorado, USA) used in the calibration experiments

| <b>Compound</b>            | <b>Mixing ratio in<br/>VOC standard<br/>(ppb); Stated<br/>accuracy 5%</b> |
|----------------------------|---------------------------------------------------------------------------|
| Methanol                   | 503                                                                       |
| Acetonitrile               | 491                                                                       |
| Methyl vinyl ketone        | 479                                                                       |
| Methyl ethyl ketone        | 497                                                                       |
| Acetaldehyde               | 490                                                                       |
| Acetone                    | 493                                                                       |
| DMS                        | 495                                                                       |
| Isoprene                   | 483                                                                       |
| Benzene                    | 492                                                                       |
| Toluene                    | 468                                                                       |
| p-Xylene                   | 477                                                                       |
| α-pinene                   | 494                                                                       |
| 1,2,4-<br>Trimethylbenzene | 510                                                                       |

New Table S2:

**Table S2: Sensitivity factor, limit of detection, instrumental uncertainty and overall uncertainty of measured VOCs from calibration experiments conducted on 4 May 2018 and 4 October 2018.**

| <i>Calibration performed date (RH)</i> | <i>VOC</i>   | <i>Sensitivity factor (ncps ppb<sup>-1</sup>)</i> | <i>Limit of detection (ppb)*</i> | <i>Instrumental uncertainty (%)</i> | <i>Overall uncertainty (%)</i> |
|----------------------------------------|--------------|---------------------------------------------------|----------------------------------|-------------------------------------|--------------------------------|
| 04.05.2018<br>(40%)                    | DMS          | 10.77 ± 0.14                                      | 0.06                             | 6                                   | 10                             |
|                                        | Isoprene     | 7.27 ± 0.13                                       | 0.10                             | 6                                   | 10                             |
|                                        | Monoterpenes | 8.21 ± 0.13                                       | 0.07                             | 7                                   | 12                             |
| 04.10.2018<br>(70%)                    | DMS          | 10.42 ± 0.21                                      | 0.12                             | 6                                   | 13                             |
|                                        | Isoprene     | 7.01 ± 0.07                                       | 0.04                             | 6                                   | 13                             |
|                                        | Monoterpenes | 7.67 ± 0.05                                       | 0.07                             | 7                                   | 12                             |

\* The limit of detection is defined as  $2\sigma$  of the measured normalized signal while measuring zero air (99.999% purity; Sigma gases, New Delhi) divided by the sensitivity.

**New Figure S2. Results of calibration experiments performed on 4 May 2018 and 4 October 2018 for DMS, isoprene and  $\alpha$ -pinene illustrating the excellent linearity and low drift in sensitivity of the PTR-QMS for these compounds**

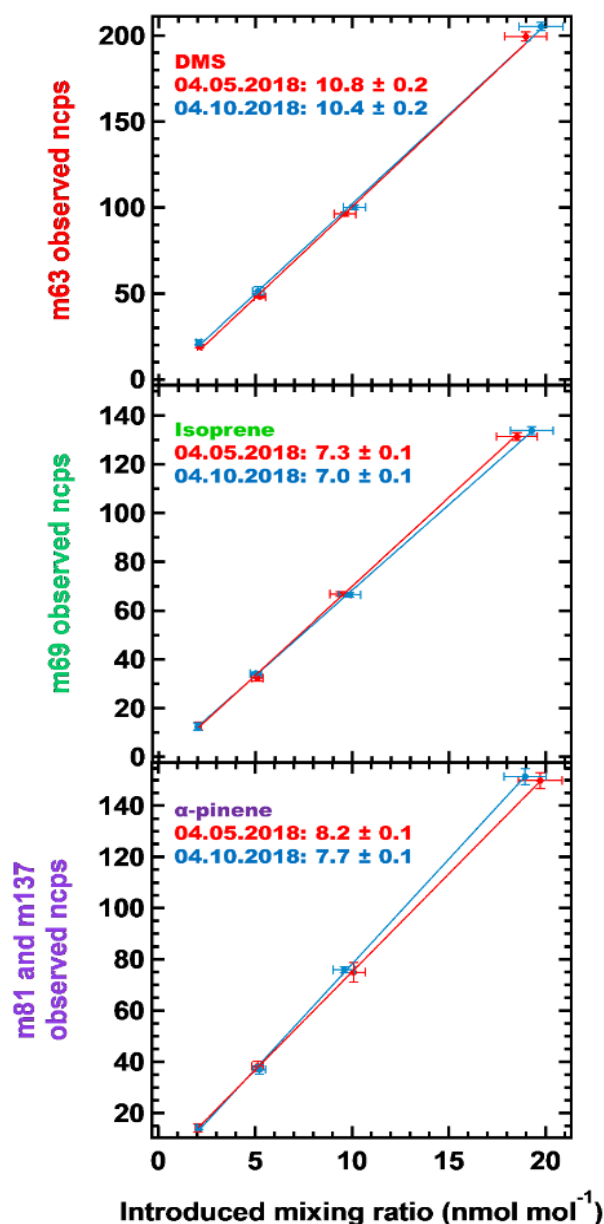

Concerning why we used the sum of  $m/z$  81 +  $m/z$  137 for monoterpene, we note that monoterpene is not a single compound but a class of compounds having the molecular formula ( $\text{C}_{10} \text{H}_{16}$ ) and that  $m/z$  137 and  $m/z$  81 ions are used to collectively detect the sum of monoterpenes using the PTR-MS technique. Examples of monoterpenes include 3-carene, myrcene,  $\alpha$ -terpinene,  $\gamma$ -terpinene,  $\beta$ -camphene,  $\alpha$ -pinene,  $\beta$ -pinene,  $\alpha$ -phellandrene, and limonene. As the fragmentation ratio between  $m/z$  137 and  $m/z$  81 ions arising from the monoterpene is not identical for the different monoterpenes, the sum of  $m/z$  81 and  $m/z$  137 is much better for quantification in such case, provided the  $m/z$  81 and  $m/z$  137 can be uniquely attributed to monoterpenes (this is the case for our dataset, please see reply to related point 14 of reviewer 1 as well)

**14)**  $M/z$  81 originate also from other compounds, in particular, LOX products and sesquiterpenes. Can the authors show the correlation between 81 and 137 to rule out that other

VOC were included as monoterpenes? Alternatively, the quantification should be based using only the parent ion (i.e.  $m/z$  137).

**Reply:** We appreciate the reviewer's query which has helped us strengthen the related discussion in the revised MS. In reply to point 1 we have already addressed this concern and also listed the revisions to the text in Section 2.2 concerning the monoterpene measurements as a new paragraph and also added the following new Figure as Figure S8.

*Figure S8: Correlation between observed  $m/z$  81 and  $m/z$  137 signals from the plant chamber output air for all seasons*

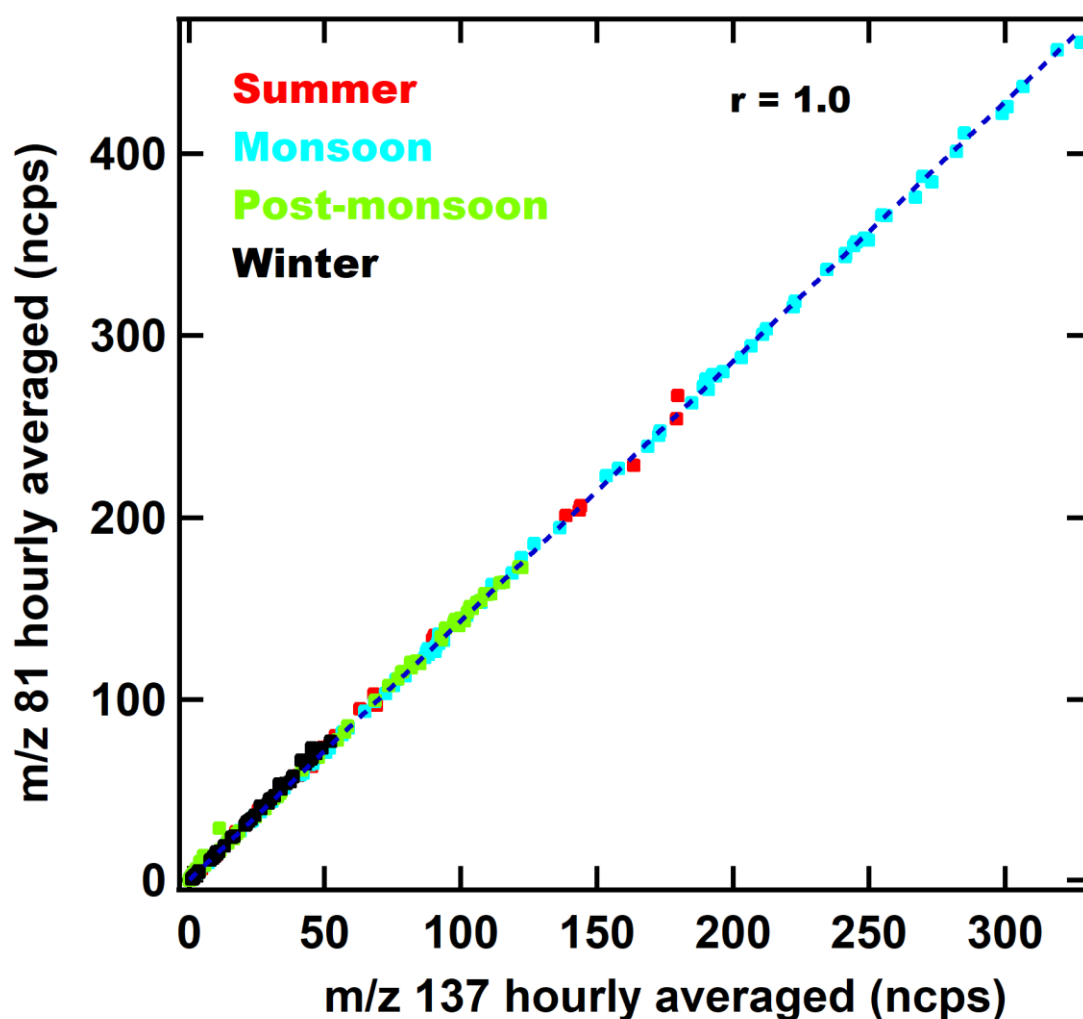

**Technical corrections:** We have numbered in order to refer them better.

**T1) P5L3:** How long were the Teflon tubing between cuvette and sampling?

**Reply:** 32 m. We have revised P5L3 to include this information:

*"The total inlet length from the cuvette exit to the instruments was 32 m and considering the inner diameter of 9.5 mm and flow rate of  $\sim 30 \text{ l min}^{-1}$ , the inlet residence time of air was always less than 10 s for the transfer from the cuvette to the instruments housed inside the facility."*

**T2)** Fig1: “nmol/m2s” should be “nmol m-2 s-1”

**Reply:** Agreed and corrected. Please refer to the reply of Specific comment 5.

**T3)** Fig2: the unit of light intensity is missing:

Fig2: please give slopes and intercepts for the linear regressions in the first row of subplots:

Fig2 legend: please add here the time period of the cumulative BVOC flux and assimilation:

**Reply:** Suggestions have been incorporated also taking into suggestions made by Reviewer 2. Please find the revised Fig. 2 of original submission (now Figure 3 of the revised version) below. Cumulative BVOC emission flux and CO<sub>2</sub> assimilation were calculated for every hour of the day and accumulated from sunrise until that hour (P7L33-34). We have added this description to the Figure caption.

***Figure 2 of original submission and new Figure 3 of revised submission:*** Cumulative BVOC fluxes versus cumulative CO<sub>2</sub> assimilation. Cumulative fluxes were calculated for every hour of the day and is accumulated from sunrise until that hour, (b) 3-D plot showing the correlation of the fluxes with instantaneous chamber temperature and PAR for vegetative growth phase and (c) Modeled versus measured VOC fluxes using parameterization presented in Table 3.



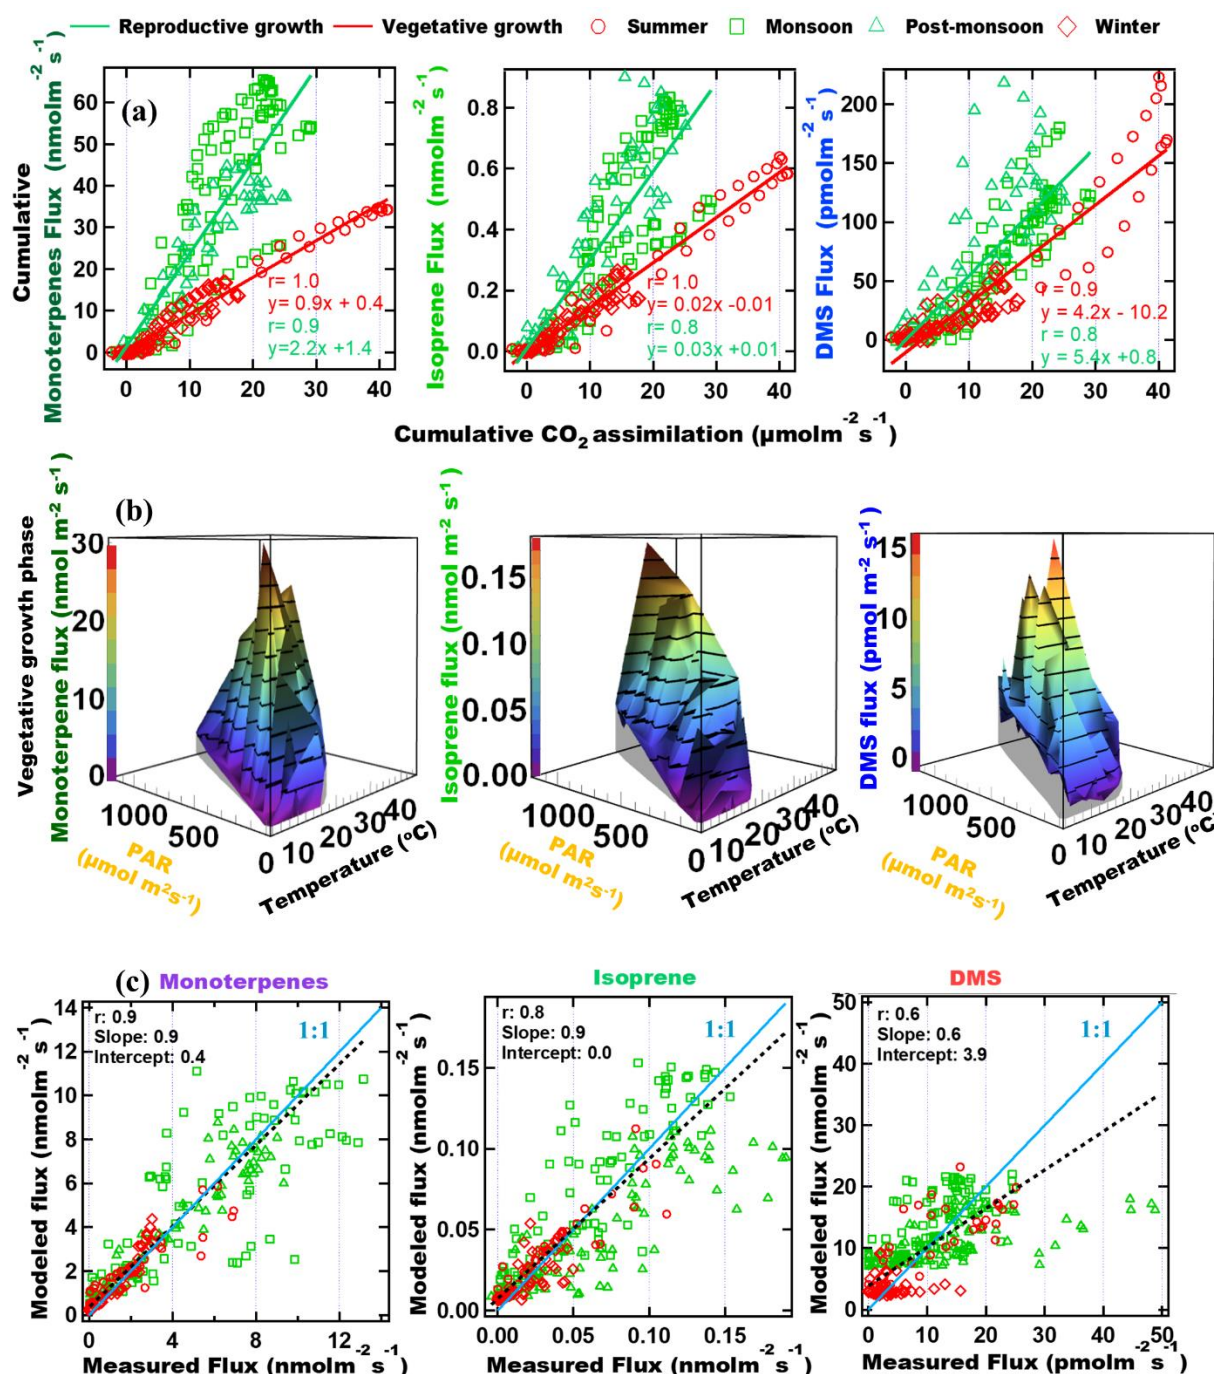

**T4) P4L6-10:** please remove the number of measurements, since this information is misleading:

**Reply:** We are sorry but it is not clear to us as to why providing the number of measurements is misleading. Perhaps the reviewer is suggesting that these numbers need to be clarified? One measurement comprised of one measurement cycle of all ions measured by the PTR-MS. The number of measurements were stated to emphasize that the data derive from primary measurements obtained at high temporal resolution, harnessing the power of the PTR-QMS. In the summer season the BVOC mixing ratios were acquired in mass scan mode sequentially monitoring mass channels from m/z 21-m/z 210 (except m/z 37 and m/z 38) with a dwell time of 0.2 s for m/z 21 (H<sub>3</sub><sup>18</sup>O<sup>+</sup>) and m/z 22 and 1s for all other m/z channels, therefore resulting

in a measurement cycle of duration of about 3 minutes. For all other seasons, the BVOC mixing ratios were acquired in the ion selective mode (60 channels) sequentially monitoring mass channels that showed enhancements in summer along with other PTR-MS instrumental background peaks and mass channels that are usually referred to as biogenic (eg: sesquiterpenes) with a dwell time of 0.2 s for m/z 21 ( $\text{H}_3^{18}\text{O}^+$ ) and 1s for all other m/z channels, therefore resulting in a measurement cycle of duration slightly less than a minute.

To avoid any confusion and also in response to reviewer 2's suggestion to keep these numbers consistent with the hourly data, we now rephrase P4L6-8 as:

*“While sampling and biogenic VOC emission measurements were performed from four Mahogany trees in winter (details in Table 1), the sampling and biogenic VOC emission measurements for three other seasons were from one of the four trees (namely Tree 1 in Table 1) as follows: 2018 summer from 22-24 May (n=52 hours of measurements), 2018 monsoon (n=200 hours of measurements) from 25 September-4 October, 2018 post-monsoon (n=163 hours of measurements) from 15-22 November, and 2019 winter from 24-29 January (n=120 hours of measurements).”*

**T5) P4L26:** please describe the leafage:

**Reply:** Information has been added. The leaf age varied depending on the season in which the measurements were conducted. They ranged from 2-11 months.

**T6) P5:** “The input air was sampled at regular interval”. It is unclear when and how often did the authors sample the inlet air.

**Reply:** We clarify this in the revised text on P5L5 of original submission as follows:

*“The input air which served as the background for flux calculations was sampled for all hours of the day in each season by taking measurements 2-3 times a day in each season at different hours of the day”*

**T7) P6L29-30** Are these temperatures statistically different?

**P6L30-31:** Are the light intensities statistically different?

**Reply:** Yes, at more than 99% confidence interval based on the Kruskal Wallis test. as already clarified in the reply to specific comment 4 of reviewer 1.

**T8) P8L31:** “paramterization” should be “parameterization”

**Reply:** Done, thank you for pointing out the typo.

## **Anonymous Referee #2**

### **General Comments**

This manuscript presents 24 (+6 in SI) days of measurements of monoterpene, isoprene and DMS emissions from Mahogany in India. The measurements were conducted using a PTR-Quad and a dynamic branch chamber. The results were compared with modelled emissions and then globally upscaled. The measurements identify Mahogany as one of the missing sources of DMS in the rainforest.

The presented data is novel and even though isoprene and monoterpene emission measurements are more and more common, DMS emission measurements are rare. Therefore, I see the result as interesting for the scientific community and recommend the paper to be accepted.

However, I would like that the Authors addressed following comments before publication:

**Reply:** We thank the reviewer for his/her encouraging and valuable remarks that the presented data is novel and rare and for recommending that the manuscript may be accepted after addressing the comments raised in this insightful and helpful review.

We have numbered the specific comments to refer to them easily below and address them point-wise below:

### **Specific comments:**

1) One major flaw in the manuscript is the missing discussion about the challenges when measuring DMS (and isoprene). Even though the authors have cited literature (de Gouw et al., 2006; Jardine et al., 2015) which extensively discuss the problem of acetaldehyde clusters' possible influence on mass 63, there is no evidence in this manuscript that this influence was ruled out. Even though, Jardine et al. (2015) stated that in their setup no influence could be seen, their instrumental settings seemed to have been optimized to suppress waterclusters ( $H_2O \cdot H_3O + H_3O^+ < 4\%$ ;  $E/N > 145 \rightarrow$  please see my comment P6 L13). There is a sentence (P6 L10-16) stating that isoprene and DMS can be measured at their respective masses without much fragmentation, which is true. As long as the PTR-MS is frequently calibrated under measurement conditions, fragmentation losses (of e.g. isoprene or DMS) are corrected by the sensitivity (this is just the case if the measured and calibrated compound are identical and the signal is above the limit of detection). However, other compounds fragmenting/clustering on the same mass (e.g. M69, M63) are a major source of uncertainty. And therefore identifying/ruling out a possible influence of acetaldehyde to the DMS signal (M63) is crucial. There is a similar issue with MBO, which fragments to M69.

**Reply:** We completely agree with the esteemed reviewer and regret the omission of the discussion and all the careful steps we took for compound assignment in the previous submission. Similar concerns were raised by reviewer1 as well, and we have combined the concerns of both reviewers on this issue. These have already been addressed in detail while replying to point 2 of reviewer 1 and point 14 of reviewer 1 and to avoid repetition of all the new Figures and text and revisions, we request Reviewer 2 to go through those replies.

2) It is not very clear when the offline sampling was used. The only references to the offline sampling are in the methods part and in the SI. I concluded, that all data used in the main manuscript were online. Therefore, I would recommend, moving the description of the offline sampling to the SI.

**Reply:** We regret that these details were not clear in our original submission. Though the information was there in the original submission, it was scattered in different places (e.g. figures in main paper and supplement).

In the revised version as mentioned in the reply to point 1 of reviewer 1, we have made the added a new Table (new Table 1 of revised MS; shown above in reply to point 1 of reviewer 1) which lists the exact dates of the online and offline sampling experiments. We request the editor, reviewers and readers to go through the reply to point 1 of reviewer 1 for details.

3) P2 L6-8 (also P3 L20-22): Please rephrase (South, Central and North America -> Americas; atmospheric environments -> environments).

**Reply:** Done. We have rephrased “South, Central and North America” to “Americas” and “atmospheric environments” to “environments”.

*P2 L6-8 has been rephrased as: “It is widely grown in the American and Asian environments (> 2.4 million km<sup>2</sup> collectively).”*

*P3L20-22 is rephrased as “The area under this tree in the American and Asian environments collectively exceeds 2.4 million km<sup>2</sup> of land area.”*

4) Refer from using the word ‘fluxes’ (= bidirectional) when you discuss your measurements. As your setup cannot capture deposition, use the word ‘emissions’ instead (e.g. P4 L2, P4 L5, P6 L28, P6 L31,...)

**Reply:** Agreed.

We have now replaced “fluxes” by “emission fluxes” in all relevant places in the revised manuscript.

These include: P2L16, P3L13, P4L2, P4L5, P6L28, P6L31, P7L2, P7L4, P7L8, P7L10, P7L11, P7L25, P8L3, P8L16, P8L21, P8L26, P8L31, P9L3, P9L4, P9L5, P9L6, P9L23, P9L24, P10L21 and also in all new text added in replies to reviewer 1.

5) P4 L6-8: The number of measurements sounds impressive; however, it is not clear what those measurements are. Is a measurement the measured 1 s dwell time data point? Is it one cycle through all measured compounds? ... If the authors want to state the amount of data at all, I would suggest to state the number of 1 h data points, shown e.g. in Fig. 1.

**Reply:** Our profuse apologies for the confusion. As mentioned in reply to point T4 of reviewer 1, we now state the number of 1 h data points for each season.

But to address the reviewer’s query, one measurement comprised of one measurement cycle of all ions measured by the PTR-MS. The number of measurements were stated to emphasize that the data derive from primary measurements obtained at high temporal resolution, harnessing the power of the PTR-QMS. In the summer season the BVOC mixing ratios were acquired in mass scan mode sequentially monitoring mass channels from m/z 21-m/z 210 (except m/z 37 and m/z 38) with a dwell time of 0.2 s for m/z 21 (H<sub>3</sub><sup>18</sup>O<sup>+</sup>) and m/z 22 and 1s for all other m/z channels, therefore resulting in a measurement cycle of duration of about 3 minutes. For all other seasons, the BVOC mixing ratios were acquired in the ion selective mode (60 channels) sequentially monitoring mass channels that showed enhancements in summer along with other PTR-MS instrumental background peaks and mass channels that are usually referred to as biogenic (eg: sesquiterpenes) with a dwell time of 0.2 s for m/z 21 (H<sub>3</sub><sup>18</sup>O<sup>+</sup>) and 1s for all other m/z channels, therefore resulting in a measurement cycle of duration slightly less than a minute.



To avoid any confusion and also in response to reviewer 2's suggestion to keep these numbers consistent with the hourly data, we now rephrase P4L6-8 as:

*"While sampling and biogenic VOC emission measurements were performed from four Mahogany trees in winter (details in Table 1), the sampling and biogenic VOC emission measurements for three other seasons was from one of the four trees (namely Tree 1 in Table 1) as follows: 2018 summer from 22-24 May (n=52 hours of measurements), 2018 monsoon (n=200 hours of measurements) from 25 September-4 October, 2018 post-monsoon (n=163 hours of measurements) from 15-22 November, and 2019 winter from 24-29 January (n=120 hours of measurements)."*

6) P4 L9: Omit outdoor (there is no natural indoor environment for Mahogany, I assume).

**Reply:** Agreed and corrected.

*P4L9 is rephrased as: "...growing in the natural environment..."*

7) P4 L29: ... using a series of traps containing steel wool, silica gel and activated charcoal. If those traps were custom build, please state so, otherwise please add the type and brand (this information can be very helpful for people who want to use a similar setup).

**Reply:** These traps were custom built.

*We have corrected line P4 L29 as "... using a series of custom built traps containing steel wool, silica gel and activated charcoal."*

8) P5 L2: ... using a second pump by ensuring to have a small positive pressure inside the chamber...How was this positive pressure achieved (by regulating the flow with a MFC or does this pump have a flow lower than 30 L min<sup>-1</sup>) and how large was the flow flushing the 60-65 m inlet line?

**Reply:** We ensured a small positive pressure inside the chamber by keeping the second pump's suction rate (~30 l min<sup>-1</sup>) close to but less than that of pump 1.

*We rephrase the statement in P5L2 as "... using a second suction pump which drew slightly less than 30 l min<sup>-1</sup> thereby ensuring a small positive pressure inside the chamber ..."*

9) P5 L8: *This is significantly longer than the steady-state ...* this statement is correct, however, after installing the chamber a longer equilibration time is necessary to prevent measurement artefacts of physical stress or small injuries of the branch (caused by the installation of the cuvette).

**Reply:** Indeed.

We rephrase P5L6-8 as:

*"After installation of the cuvette, we allowed the branch to acclimatize overnight before starting the measurements to ensure acclimatization/conditioning of leaves to the flows and chamber. This is significantly longer than the steady-state attainment time of circa 5 minutes recommended by Niinemets et al. (2011) but is necessary to prevent measurement artefacts owing to inadvertent physical stress or small injuries to the branch immediately after installation."*

10) P6 L6: ...dwell time of 1 s at each m/z channel. Which channels were measured (stated are M63, M69, M81, M137, however I assume also instrumental background peaks (e.g. M21,

M25, M32, M45, M39, M87) were measured for quality assessment) and what was the measurement cycle time (or what was the sampling frequency)?

**Reply:** Yes, we did monitor 60 m/z channels in all seasons including all the ones listed by the reviewer. This has already been clarified and details including revision to the manuscript have already been provided in replies to point 1 of reviewer 1 and point 5 of reviewer 2.

**11) P6 L8:** Please state the compounds in the calibration gas, as well as the uncertainty of the calibration gas. Furthermore, please state average sensitivities with standard deviation and limit of detection (concentration and emission) for the main compounds (Isoprene, DMS and the calibrated monoterpene compound).

**Reply:** The relevant section 2.2 has already been majorly revised to include details for all these aspects as detailed in replies to points 2 and 11 and T6 of reviewer 1, who made similar queries. To avoid repetition, we refer to these replies above.

**12) P6 L9:** *The total measurement uncertainty was less than 10% for isoprene and DMS and less than 15% for the sum of monoterpenes ...* This low uncertainty seems for me very optimistic for the used setup, especially after addressing my first comment. If I remember correctly the calibration gas from Appel-Riemer has an uncertainty of 5% (valid for 1 year after filling of the gas bottle), then adding uncertainties for 3 MFCs (1 for the inlet at the chamber, 2 for calibration, I assume), 60 – 65 m of tubing, an extra pump, as well as only 1 calibration per season (up to 20 days before measurements). Could the authors please provide the uncertainty calculations for those numbers? Also, are the same values valid for the offline sampling?

**Reply:** We thank the reviewer for the important suggestion and regret the omission in previous version. These concerns and ones raised by reviewer 1 have already been clarified in detail in previous replies (e.g. reply to point 2 of reviewer 1). The revised submissions (main manuscript and supplement) now include additional data from the calibration experiments showing the low drift in sensitivity as well as step wise calculations of sensitivity, mixing ratios and uncertainties in mixing ratios and fluxes. We refer the reviewer to the revised section 2.2 of the new version and revised supplement for these details to avoid unnecessary repetition in the response file.

**13) P6 L13:** I could not find any statement about the used E/N in Jardine et al. (2015). However, from the stated values in their paper ( $p_{\text{drift}} = 2.0 \text{ mbar}$ ,  $V_{\text{drift}} = 600 \text{ V}$ ) it seems to be either 145 Td (if the drift temperature was 50°C, like their heated inlet) or 149 Td (if the drift temperature was the more common 60°C). Therefore, their measurements did not fall under the standard operational conditions between 130 and 135 Td. Could the authors please provide average and maximum  $H_2O \cdot H_3O^+ / H_3O^+$  ratios during this measurement campaign (i.e. was it comparable with the 4% in Jardine et al., 2015)?

**14) P6 L17:** Also state the used drift voltage.

**Reply:** This has been discussed in detail already in reply to point 2 raised by the reviewer. As mentioned therein, the average  $H_2O \cdot H_3O^+ / H_3O^+$  ratio was only 4.12 % for the entire dataset which is comparable to the 4% or lower abundance during experiments conducted by Jardine et al., 2015.

We have also rephrased P6L17 as:



*“We, therefore, operated the instrument under standard operating conditions of drift tube pressure of 2.2 mbar, drift voltage of 600 V and temperature of 60 °C which yields a Townsend ratio of 135 Td. It resulted in a steady and very high primary ion count ( $1.3\text{--}2.5 \times 10^7$  counts per second (cps)  $\text{H}_3\text{O}^+$ ) and low water cluster (average abundance < 4.1% of primary ion).*

**15) P7 L3-4:** Please add that this statement is valid for winter, as below it is stated that *photosynthetically fixed carbon* (normally associated with PAR) *may be more important than emissions from storage pools* (normally associated with T).

**Reply:** Corrected.

We have rephrased P7L3-4 as: *“Thus, temperature was a major driver for emissions of all three compounds in the winter season.”*

**16) P7 L20:** Remove the space in the hyperlink (...ac.uk\cnhgroup...)

**Reply:** Done.

P7L20 is corrected as: (<http://www.es.lancs.ac.uk/cnhgroup/iso-emissions.pdf>).

**17) P7 L29:** Add the year to the Jardine et al. citation.

**Reply:** Done.

P7 L29 is corrected as: *“...in the Jardine et al. (2015) study...”*

**18) P8 L24-25:** *It is also evident that DMS has a strong dependence on temperature, but not on PAR.* The PAR dependency is very hard to see in Fig 2(b). It seems to me quite difficult to state anything about DMS, as there is a rather high offset at low PAR and T (it seems that temperature has no effect at low PAR), there is a huge decline at high T when PAR is around 500  $\mu\text{mol m}^{-2} \text{s}^{-1}$ .

**Reply:** We are thankful to the reviewer for this comment as well as the suggestion in point 21 below (please see details and reply below) to re-orient the axis. While we did state in the next line that this “dependence of DMS flux on temperature is not always followed” and “We assume that emission of DMS needs an internal sulfur source or uptake of COS (Yonemura et al., 2005; Geng and Mu, 2006) which could be the limiting factor for the huge decline at high temperature.” The revised Figure 3 made in accordance with reviewer2’s suggestion does indeed show more clearly that temperature has no effect at low PAR.

We make note of this in the revised MS by adding the following statement at Line 27 Page 8 of original submission:

*“From Figure 3 b it also appears that the temperature has no effect on the DMS emission flux at low PAR ( $< 400 \mu\text{mol m}^{-2} \text{s}^{-1}$ ).”*

**19) P10 L12:** Omit outdoor (see earlier comment).

**Reply:** Corrected.

P10L12 is rephrased as: *“growing in their natural environment in India.”*

**20) P14 Figure 1:** It seems the PAR axis label has a different color than the PAR graph, please use the same color.

**Reply:** Corrected.

Please find the revised Figure 1 of original submission (Figure 2 in revised submission) shown in specific comment 5 of anonymous referee #1.

**21) P15 Figure 2:**

- o (a) Please provide the slopes for the linear fits
- o (b) Sadly, these plots are not very clear. They give an idea of the temperature dependence, however, the PAR dependence cannot be seen. I recommend either turning these 3D plots to have the origin (0-point) at the bottom middle and PAR and T axis going with the same angles left and right (=symmetrical) or changing the plot style altogether. Depending on the changes, please state in the figure caption that the color corresponds to the respective VOC flux. Also to make that more obvious, the color bars could be stretched to cover the whole axis (then maybe one set of axis labels would be enough).
- o (c) Here I would recommend changing all y axes labels to Modeled flux (with respective unit) and state the compound as a title (centered above each plot)

**Reply:** Thank you for these useful suggestions. The changes have been incorporated and the revised Figure 2 of original submission (Figure 3 of revised submission) is shown below for easy perusal.

Figure 3(a): Cumulative BVOC emission fluxes versus cumulative CO<sub>2</sub> assimilation. Cumulative fluxes were calculated for every hour of the day and accumulated from sunrise until that hour, (b) 3-D plot showing the correlation of the emission fluxes with instantaneous chamber temperature and PAR for vegetative growth phase and (c) Modeled versus measured VOC emission fluxes using parameterization presented in Table 3

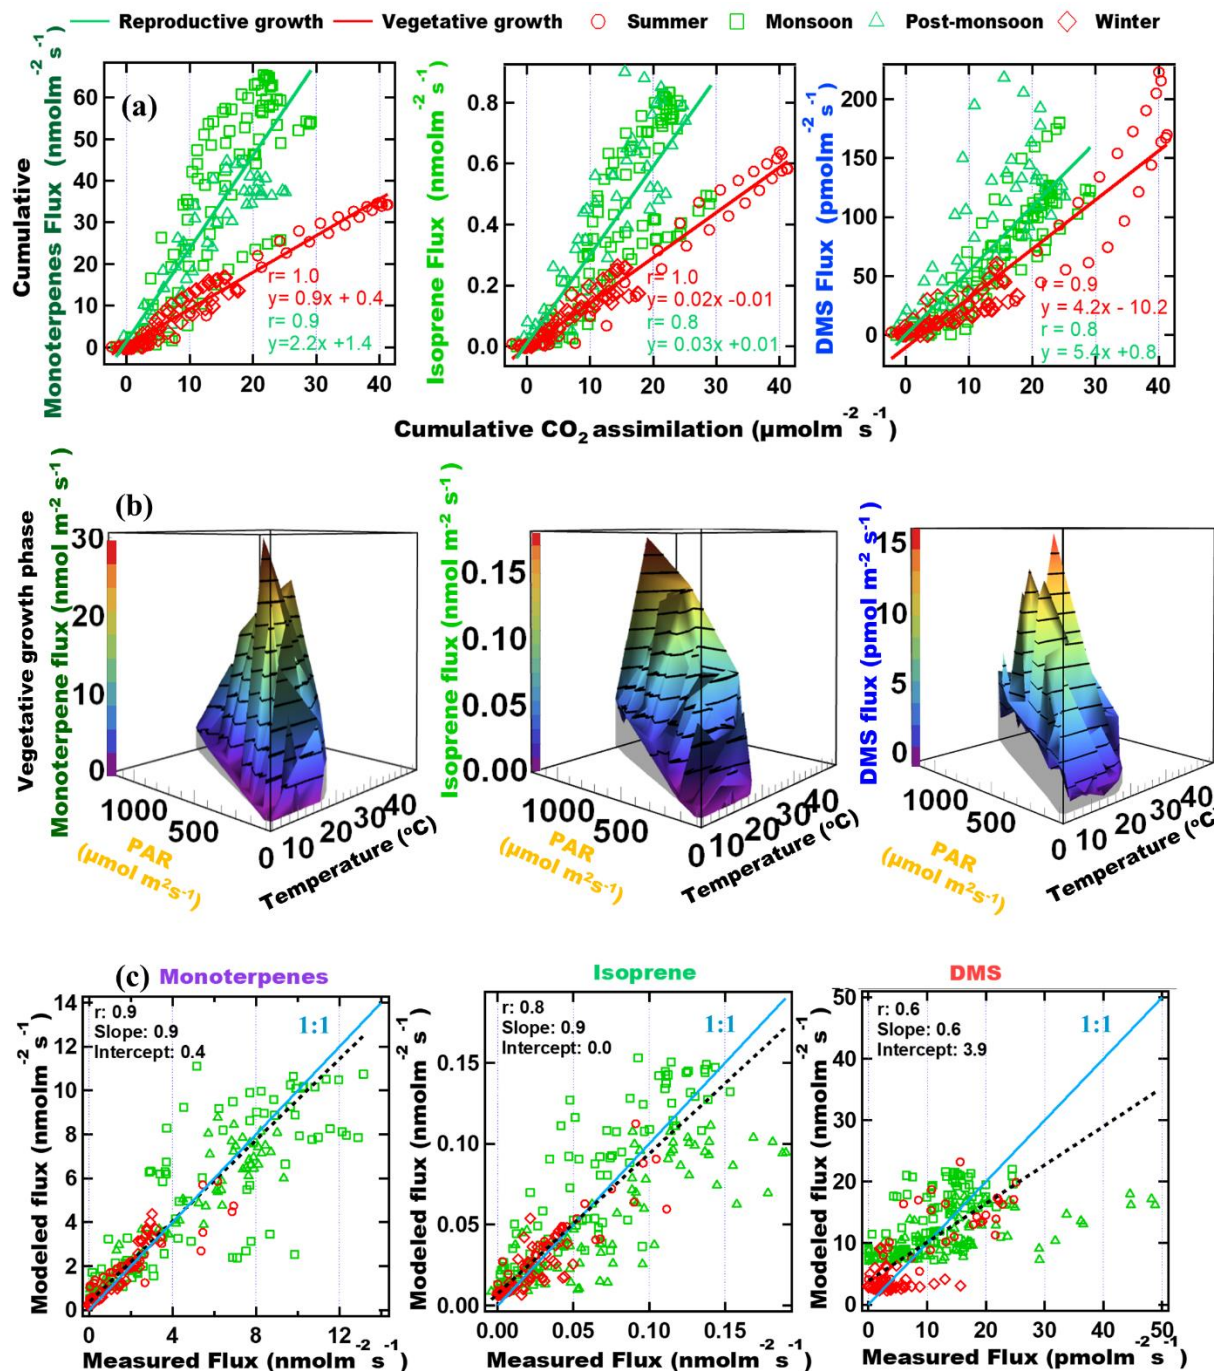

22) P16 Table 2: I recommend renaming the variables in the *Reproductive phase modeling fn*:  $f(T, \text{PAR}) = a \cdot \text{PAR} + c \cdot \exp(d \cdot T)$  to make it easier to compare to the vegetative phase modeling fn.

**Reply:** Agreed and corrected. The same has already been detailed in reply to specific comment 12 of reviewer 1.

23) P17 Table 3: ( $\times 100 \text{ nos./km}^2$ ); Please use 100 (or 102) if  $\times 100$  is a multiplication, similar as in the second column in this table. Please clarify 'nos.' Is it a unit? If so, please explain it in the table caption.

**Reply:** Corrected. nos. is given as an abbreviation for numbers. We have corrected Table 3 (Table 4 of revised manuscript) according to the referee comment and the same is shown below.

**Table 4. Distribution of Mahogany in natural forests and in plantations in terms of ground area, tree density, leaf area and calculated annual emission fluxes of monoterpenes, isoprene and DMS.**

| Country       | Natural Area <sup>i</sup><br>(10 <sup>4</sup> km <sup>2</sup> ) | Plantation Area <sup>ii</sup><br>(km <sup>2</sup> ) | Tree density <sup>iii</sup><br>Natural/Plantation<br>(x10 <sup>2</sup> km <sup>-2</sup> ) | Leaf area <sup>iv</sup><br>(km <sup>2</sup> ) | Monoterpenes<br>(Gg/yr) | Isoprene<br>(Mg/yr) | DMS<br>(Mg/yr) |
|---------------|-----------------------------------------------------------------|-----------------------------------------------------|-------------------------------------------------------------------------------------------|-----------------------------------------------|-------------------------|---------------------|----------------|
| Brazil        | 139.6                                                           | -                                                   | 0.014-1.17 <sup>b/-</sup>                                                                 | 1564-10756                                    | 10-69                   | 82-565              | 17-119         |
| Peru          | 56.5                                                            | -                                                   | -                                                                                         | 9042                                          | 58                      | 475                 | 100            |
| Bolivia       | 18.9                                                            | -                                                   | 0.1-0.2 <sup>c/-</sup>                                                                    | 1512-3025                                     | 9.7-19                  | 79-159              | 17-33          |
| Nicaragua     | 5                                                               | -                                                   | 0.6/-                                                                                     | 2400                                          | 15                      | 126                 | 27             |
| Mexico        | 3.6                                                             | -                                                   | 1.0/-                                                                                     | 2881                                          | 18                      | 151                 | 32             |
| Ecuador       | 3.5                                                             | -                                                   | -                                                                                         | 2801                                          | 18                      | 147                 | 31             |
| Colombia      | 2.6                                                             | -                                                   | -                                                                                         | 2080                                          | 13                      | 109                 | 23             |
| Guatemala     | 2.8                                                             | -                                                   | 0.2-2.0/-                                                                                 | 448-4480                                      | 2.9-29                  | 24-235              | 4.9-49         |
| Honduras      | 1.7                                                             | -                                                   | 2.0/-                                                                                     | 2720                                          | 17                      | 143                 | 30             |
| Venezuela     | 1.2                                                             | -                                                   | 1.0 <sup>d/-</sup>                                                                        | 960                                           | 6.1                     | 50                  | 11             |
| Panama        | 1                                                               | -                                                   | 0.1/-                                                                                     | 80                                            | 0.5                     | 4.2                 | 0.88           |
| Belize        | 1                                                               | 5.91                                                | 1.0-2.5/119-288 <sup>e</sup>                                                              | 825-2061                                      | 5.3-13                  | 43-108              | 9.1-23         |
| Costa Rica    | 0.3                                                             | -                                                   | 0.5-2.5/-                                                                                 | 120-600                                       | 0.77-3.8                | 6.3-32              | 1.3-6.6        |
| Indonesia     | -                                                               | 1160                                                | -                                                                                         | 3410                                          | 22                      | 179                 | 38             |
| Fiji          | -                                                               | 420                                                 | -                                                                                         | 1235                                          | 7.9                     | 65                  | 14             |
| Philippines   | -                                                               | 250                                                 | -                                                                                         | 735                                           | 4.7                     | 39                  | 8              |
| Sri Lanka     | -                                                               | 45                                                  | -                                                                                         | 132                                           | 0.85                    | 6.9                 | 1.5            |
| Guadeloupe    | -                                                               | 40                                                  | -                                                                                         | 118                                           | 0.75                    | 6.2                 | 1.3            |
| Martinique    | -                                                               | 15                                                  | -                                                                                         | 44                                            | 0.28                    | 2.3                 | 0.49           |
| Puerto Rico   | -                                                               | 13.81                                               | -/66.7-200 <sup>e</sup>                                                                   | 33-99                                         | 0.21-0.64               | 1.8-5.2             | 0.37-1.1       |
| Kerala, India | -                                                               | 1.70 <sup>a</sup>                                   | -                                                                                         | 5                                             | 0.03                    | 0.26                | 0.06           |
| Honduras      | -                                                               | 1.50                                                | -                                                                                         | 4                                             | 0.03                    | 0.23                | 0.05           |
| St. Lucia     | -                                                               | 1.00                                                | -                                                                                         | 3                                             | 0.02                    | 0.15                | 0.03           |
| <b>TOTAL</b>  | <b>237.7</b>                                                    | <b>1953.92</b>                                      |                                                                                           | <b>33154-49674</b>                            | <b>212-317</b>          | <b>1740-2607</b>    | <b>366-548</b> |

<sup>i</sup>, <sup>ii,e</sup>Lugo et al. (2003), <sup>iii</sup>Gillies et al. (1999), <sup>a</sup>Mohandas (2000), <sup>b</sup>Grogan et al. (2008), <sup>c</sup>Gullison et al. (1996), <sup>d</sup>Kammesheidt et al. (2001);  
 Leaf Area Index: 2.94 (Jhou et al., 2017)  
 Crown radius (m)= 0.139 x diameter (cm) - 2.82 x10<sup>-4</sup> x [diameter (cm)]<sup>2</sup>, r<sup>2</sup> = 0.97 (Gullison et al., 1996)

**24) PS2** Figure S1: The offline canister sampling is twice in your schematic (once at the KNF pump2 and once behind it). Normally the tubing is marked by 2 lines (e.g. between MFC and Tedlar bag), however right before the instruments it changes to normal arrows, please use only one style.

**Reply:** Thank you for the comment. We have revised it and the offline canister sampling appears only once now. We have also modified the arrows to use only one style. The revised Figure S1 is given below.

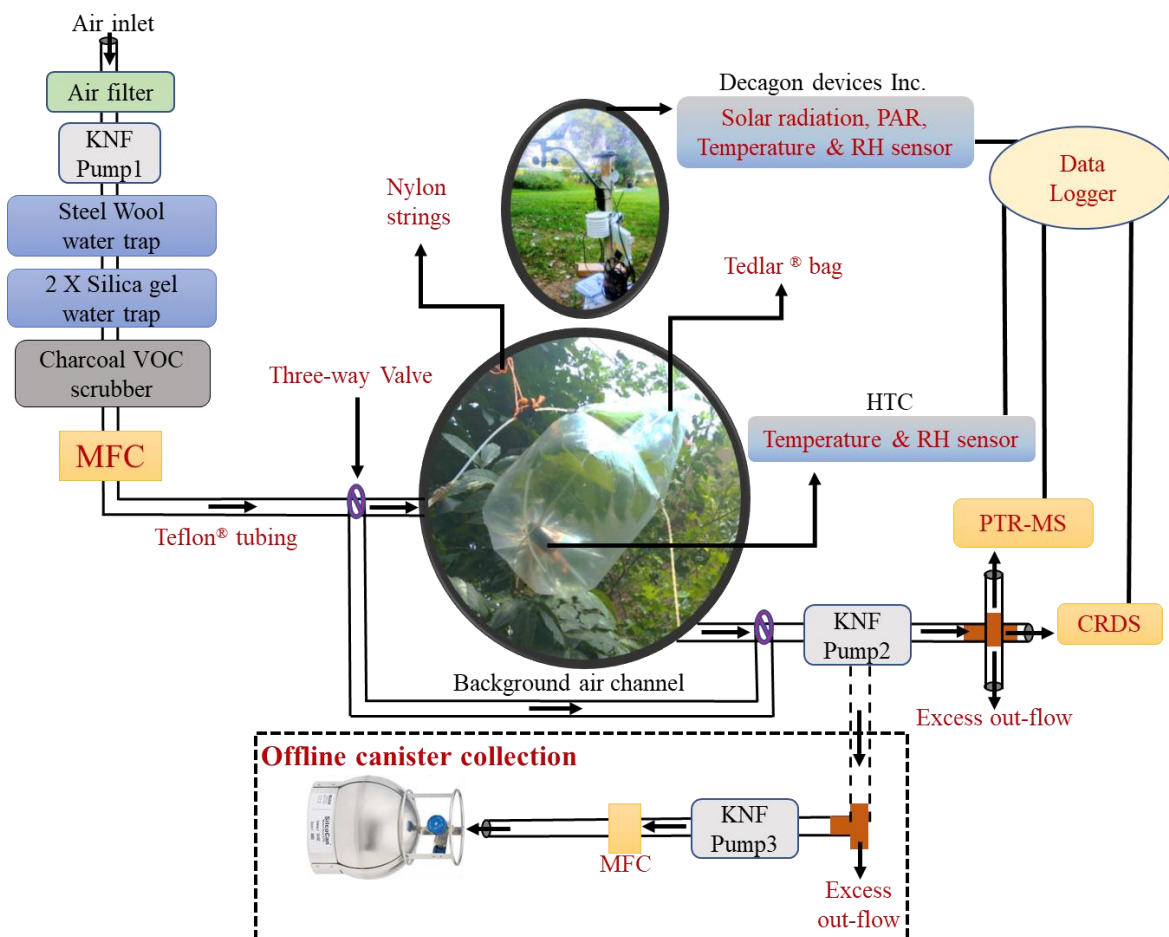

**Figure S1.** Schematic of dynamic branch cuvette setup. Offline canister collection scheme is depicted in the dashed rectangle. MFC: Mass flow controller. PTR-MS: proton transfer reaction mass spectrometry. CRDS: Cavity ring down spectroscopy. PAR: Photosynthetically active radiation.

**25) PS3 & 5, Figure S3 & S5:** The figure caption seems to be wrong, as it says that BVOC emissions are shown, but the y axis unit is ppb. Assumingly it should state Time series of BVOC concentrations in the chamber with corresponding... (in case there are actually emissions shown, please calculate background emissions and change the label).

**Reply:** Sorry for the errors in the Figure captions. We thank the reviewer for his/her careful reading and spotting the error in the caption!

There was no Fig S5 in the original supplement but we think the reviewer meant Fig. S2 and S4.

The Figures S2 and S4 now appear as Figures S9 and S11 and showed the mixing ratio of the gases from the cuvette output air and the background mixing ratios in the cuvette input air. We have corrected the captions as follows in the revised supplement:



*“Figure S9: Time series of BVOC mixing ratios with the corresponding background mixing ratios in nmol mol<sup>-1</sup>. Background mixing ratios are shown as dotted line.”*

and,

*“Figure S11: Time series of winter time BVOC mixing ratios with the corresponding background mixing ratios in nmol mol<sup>-1</sup>. Background mixing ratios are shown as dotted line. Blue shaded region marks a rain event.”*

**26) PS4 & 5, Figure S4 & S5:** As there is no reference in the main manuscript to these figures, could you please provide some context to the figures.

**Reply:** We thank the reviewer for noting this. In the revised version, we have now added reference in the main manuscript to this and other supplementary Figures and Tables.

The following line has been added in the main manuscript at P7L13 of original submission to refer these figures.

*“The time series of BVOC mixing ratios in output air of the cuvette alongwith the background mixing ratios in input air are shown in Figure S9 for Tree 1 and Figure S11 for Trees 2,3 and 4, Figure S10 shows the wintertime BVOC emission fluxes for Trees 2,3 and 4 along with PAR and temperature (expressed in nanomols or picomols per m<sup>2</sup> leaf area per second).”*

#### **Technical corrections:**

(see:[https://www.atmosphericchemistryandphysics.net/for\\_authors/manuscript.preparation.html](https://www.atmosphericchemistryandphysics.net/for_authors/manuscript.preparation.html))

**1)** Use SI units (e.g. P4 L19: change to metric) [*For units of **physical quantities**, the metric system is mandatory and, wherever possible, SI units should be used.*]

**Reply:** Corrected.

P4L19 has been re-written as: “...*Dimension: 0.61 m × 0.91 m, 0.05 mm thickness.*”

**2)** State the inner diameters of tubing (instead of outer diameters), as those are the crucial parameters for volume, residence time, line losses.

**Reply:** Corrected.

P4L22 is rephrased as: *The bag has one open end and two Jaco fittings (6.3 mm) for inlet and outlet air flow Teflon tubing (0.63 mm, 3.2 mm, 6.3 mm and 9.5 mm I. D., 60-65 m in total with > 95 % length made of 9.5 mm I.D.).*

**3)** Follow the recommendations of the journal for the format of your units (e.g. P2 L13&14, P5 L1,...)

[*Regarding the **notation**, if units of physical quantities are in the denominator, contain numbers, and are abbreviated, they must be formatted with negative exponents (e.g. 10 km h<sup>-1</sup> instead of 10 km/h)*]

**Reply:** Done.

We have corrected P2L13-14 as: “(average in post monsoon: ~19 ng g<sup>-1</sup> (leaf dry weight) hr<sup>-1</sup>) relative to previous known tree DMS emissions, high monoterpenes (average in monsoon: ~15 µg g<sup>-1</sup> (leaf dry weight) hr<sup>-1</sup>).”

P5L1 is corrected as: “at 30 l min<sup>-1</sup>”, P5L15 is corrected as: “of 500 ml min<sup>-1</sup>”, P6L3 is corrected as: “kcal mol<sup>-1</sup>”, P6L6 as “ncps ppb<sup>-1</sup>”, P10L14-17 as: “(average in post monsoon: ~19 ng g<sup>-1</sup> (leaf dry weight) hr<sup>-1</sup>) relative to previous known tree DMS emissions, high monoterpenes (average in monsoon: ~15 µg g<sup>-1</sup> (leaf dry weight) hr<sup>-1</sup> which are comparable to high emitters such as oak trees) and low emissions of isoprene (< 0.09 µg g<sup>-1</sup> (leaf dry weight) hr<sup>-1</sup>).”

4)Unify the way you state instruments (often type, company, country are stated, sometimes not; e.g. P4 L13, P4 L25, P5 L1, P5 L5,...)

**Reply:** Done.

We have unified the format as: (Type (model), company, country; other details if any).

P4L25 is corrected as: “(VP-4 RH and T sensor, QSO-S PAR sensor, and GS1 SM sensor, Decagon devices, USA)”,

P5L1 is corrected as: “(EL-FLOW, Bronkhorst High-Tech Netherlands; stated uncertainty 2%)”, P5L5 is corrected as: “(BIOS Drycal definer 220, Mesa Labs, US)”.

5)Please use either L or l for the unit of liter (e.g. P5 L1, P5 L15,...)

**Reply:** The inconsistency is regretted. We have used l for abbreviating litre.

6)Sometimes spaces are missing between values and units (e.g. P4 L15,P9 L21,... )

**Reply:** We have corrected them accordingly.

P5L15 is corrected as: “250 m”, P9L21 is corrected as: “80 cm”.



# **High DMS and monoterpene emitting big leaf Mahogany trees: discovery of a missing DMS source to the atmospheric environment**

Lejish Vettikkat<sup>1</sup>, Vinayak Sinha<sup>1</sup>, Savita Datta<sup>1</sup>, Ashish Kumar<sup>1</sup>, Haseeb Hakkim<sup>1</sup>, Priya Yadav<sup>1</sup>,  
Baerbel Sinha<sup>1</sup>

5 <sup>1</sup>Department of Earth and Environmental Sciences, Indian Institute of Science Education and Research Mohali, Sector 81, S.  
A. S. Nagar, Manauli PO, Punjab, 140306, India

*Correspondence to:* Dr. Vinayak Sinha (vsinha@iisermohali.ac.in)

**Abstract.** Biogenic volatile organic compounds exert a strong influence on regional air quality and climate through their roles in the chemical formation of ozone and fine mode aerosol. Dimethyl sulphide (DMS), in particular, can also impact cloud formation and the radiative budget as it produces sulfate aerosols upon atmospheric oxidation. Recent studies have reported DMS emissions from terrestrial sources, however their magnitudes have been too low to account for the observed ecosystem scale DMS emission fluxes. Big-leaf Mahogany (*Swietenia macrophylla*) is an agro-forestry and natural forest tree known for its good quality timber and listed under the Convention on International Trade in Endangered Species (CITES). It is widely grown in ~~several South American, Central American, North American, the American~~ and Asian ~~atmospheric~~ environments (> 2.4 million km<sup>2</sup> collectively). Here, we investigated emissions of monoterpenes, isoprene and DMS as well as seasonal carbon assimilation from four big-leaf Mahogany trees in their natural outdoor environment using a dynamic branch cuvette system, high sensitivity proton transfer reaction mass spectrometer and cavity ring down spectrometer. The emissions were characterized in terms of environmental response functions such as temperature, radiation and physiological growth phases including leaf area over the course of four seasons (summer, monsoon, post-monsoon, winter) in 2018-19. We discovered remarkably high emissions of DMS (average in post monsoon: ~19 ng/g<sup>-1</sup> leaf dry weight/hr<sup>-1</sup>) relative to previous known tree DMS emissions, high monoterpenes (average in monsoon: ~15 µg/g<sup>-1</sup> leaf dry weight/hr<sup>-1</sup> which are comparable to oak trees) and low emissions of isoprene. Distinct linear relationships existed in the emissions of all three BVOCs with higher emissions during the reproductive phase (monsoon and post-monsoon seasons) and lower emissions in the vegetative phase (summer and winter seasons) for the same amount of cumulative assimilated carbon. Temperature and PAR dependency of the BVOC emissions enabled formulation of a new parameterization for use in global BVOC emission models. ~~Finally, u~~Using the measured seasonal emission fluxes, we provide the first estimates for the global emissions from Mahogany trees which amount to circa 210-320 Gg yr<sup>-1</sup> for monoterpenes, 370-550 Mg yr<sup>-1</sup> for DMS and 1700-2600 Mg yr<sup>-1</sup> for isoprene. Finally, through the results obtained in this study, we have been able to discover and identify Mahogany as one of the missing natural sources of ambient DMS over the Amazon rainforest as well. These new emission findings, seasonal patterns, and estimates will be useful for initiating new studies to further improve the global BVOC terrestrial budget.

## 1 Introduction

Biogenic volatile organic compound (BVOC) emissions contribute to 90% of total annual VOC emissions (Guenther et al., 1995; Fehsenfeld et al., 1992). Of the total BVOC emissions of 1000 Tg yr<sup>-1</sup> estimated by MEGAN 2.1, terpenoids like isoprene, monoterpenes, and sesquiterpenes contribute about 70% to the total and are emitted majorly in the tropics (Guenther et al., 2012). When mixed with urban air which is typically rich in nitrogen oxides, these highly reactive BVOCs can impact regional air quality significantly by fueling formation of secondary pollutants such as ozone and secondary organic aerosols (SOA) with consequences also for the regional climate (Atkinson and Arey, 2003; Kavouras et al., 1998; Goldstein et al., 2009).

DMS plays a significant role in atmospheric chemistry as it contributes to the formation of ambient sulfate aerosol particles upon atmospheric oxidation. This new particle formation (NPF) can further contribute to direct and indirect radiative forcing by forming cloud condensation nuclei (CCN) (Andreae and Crutzen, 1997). The major biogenic source of dimethyl sulfide (DMS) in the atmosphere are marine phytoplankton (Stefels, 2000; Charlson et al., 1987; Lovelock et al., 1972; Watts, 2000).

5 However, a recent study from the Amazon rainforest reported high DMS mixing ratios above the forest and concluded that there is a net ecosystem source for DMS (Jardine et al., 2015). Only a few previous studies have shown trees to be potential terrestrial sources of DMS possibly by the uptake of carbonyl sulfide (COS) or from sulfur sources within the tree (Yonemura et al., 2005; Geng and Mu, 2006; Kesselmeier et al., 1993).

Terpenoids play key functional roles in chemical ecology and can be released by plants due to both biotic and abiotic stresses  
10 such as high temperature (Loreto et al., 1998; Sharkey and Singsaas, 1995), intense light (Vickers et al., 2009) and herbivory (Kappers et al., 2011). BVOC emissions are modeled (Guenther et al., 2012) using land use land cover data, temperature, light and other meteorological parameters as key inputs. However, large intra-annual and intra-species variability exist which lead to large uncertainties for annual emission fluxes. In specific instances where the physiological and biochemical pathways responsible for the BVOC emission are also not understood, such as for DMS (Yonemura et al., 2005), it is not even possible  
15 to model the BVOC emissions. Global warming and land use changes further complicate emission flux calculations of BVOCs in models (Peñuelas, 2003; Unger, 2014).

*Swietenia macrophylla* King commonly called the Big-leaf Mahogany is a neotropical tree species which occurs naturally in both the northern hemisphere and southern hemisphere spanning across regions from Mexico (23°N) to the southern Amazon (18°S) and covering an area of circa 150 million hectares (Blundell, 2004). Due to its highly-valued best quality timber,  
20 plantations of this species are also widespread in several parts of South Asia and Southeast Asia (Mayhew et al., 2003). The area under this tree in ~~South-American, Central-American, North-American~~ the American and Asian ~~atmospheric~~ environments collectively exceeds 2.4 million km<sup>2</sup> of land area. This tree species is listed in the Convention on International Trade in Endangered Species (CITES) of Wild Fauna and Flora Appendix II as it faces a threat due to widespread unsustainable logging (Grogan and Barreto, 2005). New silviculture and agroforestry of Mahogany are on an upsurge to sustainably comply with the  
25 demand for its timber due to the strict law enforcement, that prohibits the illegal logging from natural forests which had met the market requirements before the CITES listing (Ward et al., 2008). Varshney et al. 2003 were the first group in India to screen forty tropical Indian trees in terms of their isoprene emission potential, and there now exists a fairly large worldwide database for trees in terms of their isoprene and monoterpene emission potential (<http://www.es.lancs.ac.uk/~cnhgroup/iso-emissions.pdf>). However, to the best of our knowledge, *Swietenia macrophylla* King BVOC emissions have not been  
30 investigated previously.

In this study, we investigated emissions of monoterpenes, isoprene and DMS and carbon assimilation from four big-leaf Mahogany trees growing in north India in their natural ~~outdoor~~ environment using a dynamic branch cuvette system, a high sensitivity proton transfer reaction mass spectrometer (PTR-MS) and a cavity ring down spectrometer (CRDS). The emissions were characterized in terms of environmental response functions such as temperature, radiation and physiological growth

phases including leaf area. While four trees were studied in winter, one of the four trees was also studied over the course of four seasons (summer, monsoon, post-monsoon, winter) during 2018-19. Using the derived relationships, a new parameterization for use in global BVOC emission models is proposed. Finally, using the measured seasonal emission fluxes and currently documented natural and planted Mahogany tree cover areas, we provide the first estimates for the global annual emissions of monoterpenes, DMS and isoprene from Mahogany trees.

## 2 Materials and Methods

### 2.1 Sampling, branch cuvette experiments and flux calculation methodology

Table 1 provides a summary of the sampling dates along with the average and ambient variability (as standard deviation) of the temperatures and photosynthetic active radiation (PAR) during each of the sampling experiments. Sampling and biogenic VOC emission measurements were performed during four seasons: 2018 summer from 22-24 May (n>3000 measurements), 2018 monsoon (n>12400 measurements) from 25 September-4 October, 2018 post-monsoon (n>10300 measurements) from 15-22 November, and 2019 winter from 24-29 January (n>7300 measurements). A total of four big leaf Mahogany (*Swietenia macrophylla*) trees growing in the natural outdoor environment in the north west Indo-Gangetic Plain (30.667°N, 76.729°E, 310 m a.s.l.) were sampled using a dynamic branch cuvette sampling system. While sampling and biogenic VOC emission measurements were performed from four Mahogany trees in winter (details in Table 1), the sampling and biogenic VOC emission measurements for three other seasons were from one of the four trees (namely Tree 1 in Table 1) as follows: 2018 summer from 22-24 May (n=52 hours of measurements), 2018 monsoon (n=200 hours of measurements) from 25 September-4 October, 2018 post-monsoon (n=163 hours of measurements) from 15-22 November, and 2019 winter from 24-29 January (n=120 hours of measurements). Monoterpenes, isoprene, dimethyl sulfide (DMS) were measured using a high sensitivity proton transfer reaction mass spectrometer (PTR-MS; HS Model 11-07HS-088; Ionicon Analytik Gesellschaft, Austria) while carbon dioxide was measured using a cavity ring down spectrometer (CRDS; Model G2508, Picarro, Santa Clara, USA). The same tree was sampled to obtain the inter-seasonal variability. Since observations showed significant DMS emissions we sampled three additional trees, two of which were growing within 10 m of each other and the third of which was growing approximately 250 m away, during wintertime. While two of the three trees were sampled at high temporal resolution continuously in an online manner (n>1000 measurements per day), offline sampling for collection of whole air samples from the dynamic branch cuvettes was carried out in passivated steel canisters from the distant tree. Below we describe the dynamic branch cuvette system and trace gas measurements.

Polyvinyl fluoride bags (PVF, Tedlar®; 95% transmittance, Dimension: 0.61 m × 0.91 m, 0.05 mm thickness 24" × 36", 2 mil thickness. Avg. capacity: 54 L; Jensen Inert Products, Part no. GST002S-2436TJC, USA;) were used as the cuvette material.

Previous studies have already discussed its advantages for both analytical and practical purposes (Ortega and Helmig, 2008; Ortega et al., 2008). The bag has one open end and two Jaco fittings (6.3 mm) for inlet and outlet air flow Teflon tubing (0.633-2 mm, 3.26-3 mm, 6.342-8 mm and 9.549-2 mm I.D., 60-65 m in total with > 95 % length made of 9.5 mm I.D.). The

Mahogany branch was equipped with a temperature (T) and relative humidity (RH) sensor (No: 201403513, HTC easy Log, India) to monitor the cuvette temperature and RH. Ambient meteorological parameters and soil moisture (SM) were also measured using sensors for temperature and RH, PAR and soil moisture (VP-4 RH and T sensor, QSO-S PAR sensor, and GS1 SM sensor, Decagon devices, USA)(~~Decagon devices, USA~~), placed adjacent to the tree. A schematic of the dynamic branch cuvette system can be found in Fig. S1. Branches with similar leaf age (ranging from 2-11 months) were selected also ensuring that the cuvette received sunlight throughout the day. The cuvette was suspended carefully on the tree branch to minimize the weight stress on the tree and avoid foliage contact within the cuvette. Input air was generated from ambient air using a series of custom built traps containing steel wool, silica gel, and activated charcoal. Measurements of ozone using a portable ozone monitor (PO3M, 2B Technologies, Colorado, US) and the target VOCs in the input air showed that the traps worked quite well with concentrations below detection limit or extremely low values in the input air. A high capacity Teflon VOC pump (Model N145.1.2AT.18, KNF, Germany) was used to ensure a constant flow of air into the cuvette via a mass flow controller (EL-FLOW, Bronkhorst High-Tech Netherlands; stated uncertainty 2%)(~~Bronkhorst High-Tech; stated uncertainty 2%~~) at 30 l min<sup>-1</sup>. Air from the output port of the cuvette was drawn into the IISER Mohali Atmospheric Chemistry Facility (Sinha et al., 2014) using a second suction pump which drew slightly less than 30 l min<sup>-1</sup> thereby ensuring a small positive pressure inside the chamber using a second pump by ensuring a small positive pressure inside the chamber for dynamic and turbulent flow of air through the cuvette. The total inlet length from the cuvette exit to the instruments was 32 m and considering the inner diameter of 9.5 mm and flow rate of ~30 l min<sup>-1</sup>, the inlet residence time of air was always less than 10 s for the transfer from the cuvette output to the instruments housed inside the facility. The total inlet residence time was always less than 30 s for the transfer of air from the cuvette to the instruments housed inside the facility. All flows were measured using a NIST calibrated flow meter (BIOS Drycal definer 220, Mesa Labs, US)(~~BIOS Drycal definer 220~~). The input air which served as the background for flux calculations was sampled for all hours of the day in each season by taking measurements 2-3 times a day in each season at different hours of the day. The input air was sampled at regular intervals by diverting the air flow such that it bypassed the branch cuvette. After installation of the cuvette, we allowed the branch to acclimatize overnight before starting the measurements to ensure acclimatization/conditioning of leaves to the flows and chamber. This is significantly longer than the steady-state attainment time of circa 5 minutes recommended by Niinemets et al. (2011) but is necessary to prevent measurement artefacts owing to inadvertent physical stress or injuries to the branch immediately after installation. After installation of the cuvette, we allowed the branch to acclimatize overnight before starting the measurements. This is significantly longer than the steady-state attainment time of circa 5 minutes recommended by Niinemets et al. (2011) and was done to ensure acclimatization/conditioning of leaves to the flows and chamber. After completion of the measurements, the leaves were destructively harvested from the enclosed branch to measure the total leaf area (m<sup>2</sup>) inside the cuvette and dried at 60 °C to also measure the leaf dry weight (ldw). Data for the same is available in Table S1.

Whole air was sampled actively for offline measurements in commercially available 6 L passivated SilcoCan air sampling steel canisters (Restek, USA) and then analyzed with PTR-MS and CRDS within 6 hours of sample collection as described in our previous work (Chandra et al., 2017). Briefly, air was sampled into the canisters over a period of 30 minutes at a flow rate

Formatted: Font: Not Italic

of 500 ml·min<sup>-1</sup> to final pressure of 30 psi using a Teflon VOC pump (Model – N86 KT.45.18; KNF, Germany) and mass flow controller (Max. capacity: 500 sccm; Bronkhorst High-Tech; Germany; stated uncertainty 2%).

Emission fluxes for the sum of monoterpenes, isoprene and dimethyl sulfide normalized to leaf area were obtained using Eq. (1) (Sinha et al., 2007; Niinemets et al., 2011)

$$EF_{BVOC} \text{ (nmol m}^{-2} \text{ s}^{-1}) = \frac{m_{out,BVOC} - m_{in,BVOC} \text{ (nmol mol}^{-1})}{V_m \text{ (m}^3 \text{ mol}^{-1})} \times \frac{Q \text{ (m}^3 \text{ s}^{-1})}{A \text{ (m}^2)} \quad (1)$$

where,  $m_{out,BVOC} - m_{in,BVOC}$  is the difference in the mixing ratios of the BVOC between output and input air,  $Q$  was the flow rate of air passing through the cuvette system in m<sup>3</sup> s<sup>-1</sup>,  $V_m$  was the molar volume of gas calculated using the cuvette temperature.

The carbon assimilation rate,  $A_{net}$  (μmol m<sup>-2</sup> s<sup>-1</sup>) was calculated using Eq. (2) (Huang et al., 2018)

$$A_{net} \text{ (nmol m}^{-2} \text{ s}^{-1}) = \frac{[CO_{2,in}] - [CO_{2,out}] \text{ (} \mu\text{mol mol}^{-1})}{V_m \text{ (m}^3 \text{ mol}^{-1})} \times \frac{Q \text{ (m}^3 \text{ s}^{-1})}{A \text{ (m}^2)} \quad (2)$$

where  $[CO_{2,in}] - [CO_{2,out}]$  is the effective  $[CO_2]$  taken up by the leaves inside the cuvette.  $Q$  and  $V_m$  were the same as used in Eq. (1). By comparison with ambient air measurements for the week just before and after the cuvette experiments, it was found that  $[CO_{2,in}]$  was equivalent to ambient  $[CO_2]$  for the corresponding hour of the day and thus the ambient  $CO_2$  values were used as  $[CO_{2,in}]$  in Eq. (2).

## 2.2 Isoprene, monoterpene, dimethyl sulphide and carbon dioxide measurements

The output air from the cuvette was sub-sampled into a high-sensitivity proton transfer reaction quadrupole mass spectrometer (PTR-MS; HS Model 11-07HS-088; Ionicon Analytik Gesellschaft, Austria) for the measurements of isoprene, DMS and sum of monoterpenes. The instrument has been previously characterized in detail elsewhere (Sinha et al., 2014; Chandra et al., 2017; Kumar et al., 2018). In this technique, most analyte molecules having a proton affinity greater than water vapour (165 kcal·mol<sup>-1</sup>) undergo soft chemical ionization with reagent hydronium ions (H<sub>3</sub>O<sup>+</sup>) inside a drift tube to form protonated organic ions which are typically detected at mass to charge ratios ( $m/z$ ) = molecular ion + 1. The product ions are then separated using a quadrupole mass analyzer and detected using a secondary electron multiplier. Measurements were conducted in mass can mode during summer season and the ion selective mode in subsequent seasons typically with a dwell time of 1s at each VOC specific  $m/z$  channel. Compound-specific sensitivities (ncps·ppb<sup>-1</sup>) were determined using calibration experiments involving dynamic dilution of a VOC gas standard (Apel–Riemer Environmental, Inc., Colorado, USA; containing thirteen VOCs at circa 500 ppb; details provided in Table S1) on 4 May 2018, 4 October 2018, 14 November 2018 and 22 January 2019. The pre-mixed VOC gas standard (Apel–Riemer Environmental, Inc., Colorado, USA) contained 495 ppb of dimethyl sulphide (detected at  $m/z$  63), 483 ppb of isoprene (detected at  $m/z$  69) and 494 ppb of the monoterpene  $\alpha$ -pinene (detected at  $m/z$  137 and  $m/z$  81 after fragmentation). The stated accuracy of the VOC standard was 5% for all these compounds and as stated in the manufacturer's certificate several of the compounds remain stable even beyond the one year period mentioned in the certificate. We also verified the same for DMS, isoprene and alpha-pinene by comparison with newer VOC gas standards for



which the certificate was still valid and is a standard practice in our laboratory to keep track of any changed concentrations inside the VOC standard after the expiry date (see for e.g. Table S1 of Sinha et al., 2014). The gas standard was dynamically diluted with VOC free-zero air generated using a Gas Calibration Unit (GCU-s v2.1, Ionimed Analytik, Innsbruck, Austria). The flows of both the standard gas and zero air mass flow controllers were measured independently before and after the calibration experiments using a NIST calibrated flow meter (BIOS Drycal definier 220, Mesa Labs, US). Figure S2 presents data from two calibration experiments conducted on 4 May 2018 and 4 October 2018, that show there was very little drift in sensitivity of the PTR-QMS for the three compounds (DMS < 3.8%; isoprene < 4.1 % and alpha-pinene < 6.1 %) even over a period spanning 5 months. The uncertainties were calculated using the root mean square propagation of individual uncertainties including the instrumental precision error, 5% accuracy error inherent in the VOC gas standard and 2% precision error of the MFCs as explained in Sinha et al. 2014. For offline measurements, the standard deviation associated with the average value obtained for each canister measurement already included the instrumental precision error and mass flow controller precision errors. The procedure for calculation of the uncertainties in mixing ratios and emission fluxes has been detailed in the supplement. Table S2 lists the sensitivity factor, limit of detection, instrumental uncertainty and total measurement uncertainty for isoprene, DMS and sum of monoterpenes. The total measurement uncertainty was found to be less than equal to 13 % ~~less than equal to 13 %~~ for isoprene, DMS and sum of monoterpenes also accounting for the instrumental background (determined by sampling VOC free air) at these m/z ratios. Extensive reviews (de Gouw and Warneke, 2007; Yuan et al., 2017) of previous PTR-MS studies including inter-comparisons with other more specific techniques as well as more recent validation experiments for DMS detection (Jardine et al., 2015) have demonstrated that under standard PTR-MS operational conditions ranging from 130-135 Td, isoprene and dimethyl sulfide can be detected at m/z 69 and m/z 63, respectively without any significant fragmentation and that as monoterpenes fragment their quantification can be accomplished by taking the sum of the major ions formed, namely m/z 81 and m/z 137 (Lindinger and Jordan, 1998; Tani et al., 2003). We, therefore, operated the instrument under standard operating conditions of drift tube pressure of 2.2 mbar, drift voltage of 600 V and temperature of 60 °C which yields a Townsend ratio of 135 Td. It resulted in a steady and very high primary ion count (1.3-2.5 x 10<sup>7</sup> counts per second (cps) H<sub>3</sub>O<sup>+</sup>) and low water cluster (average abundance < 4.1% of primary ion). ~~We, therefore, operated the instrument under standard operating conditions of drift tube pressure of 2.2 mbar and temperature of 60 degrees which yields a Townsend ratio of 135 Td. In the next few paragraphs, we provide a detailed description about the steps we took to account for potential interferences concerning identification of DMS, isoprene and the sum of monoterpenes using our PTR-QMS.~~ When we commenced the first set of plant cuvette measurements in summer we undertook mass scans for the input air and output air into the branch cuvette over the entire mass range of (m/z 21- m/z 210) during the experiments. We found that in comparison to the ambient air, the mass scans contained very few peaks and the spectra was remarkably simple (see Fig S3). The results of these mass scans formed the basis for our choice of what masses to monitor in subsequent plant chamber experiments in other seasons from the same tree. Despite the simple spectra obtained in our mass scan results during summer, for subsequent experiments conducted in the selected ion monitoring (SIM) mode in other seasons, we still monitored 60 m/z

Formatted: Font: Not Italic

Formatted: Font: Not Bold

Formatted: Font: Not Bold

channels of interest keeping in mind the PTR-MS literature for BVOC emissions, major atmospheric VOCs, and abundant ions formed generally due to the ion chemistry in the PTR-MS drift tube, which include impurity ions such as  $m/z$  30 ( $\text{NO}^+$ ),  $m/z$  32 ( $\text{O}_2^+$ ) etc... The list of 60 also included  $m/z$  42,  $m/z$  43,  $m/z$  44,  $m/z$  45,  $m/z$  46,  $m/z$  47,  $m/z$  48,  $m/z$  49,  $m/z$  55,  $m/z$  57,  $m/z$  58,  $m/z$  59,  $m/z$  60,  $m/z$  61,  $m/z$  63,  $m/z$  65,  $m/z$  67,  $m/z$  68,  $m/z$  69,  $m/z$  70,  $m/z$  71,  $m/z$  72,  $m/z$  73,  $m/z$  74,  $m/z$  75,  $m/z$  79,  $m/z$  81,  $m/z$  83,  $m/z$  85,  $m/z$  87,  $m/z$  88,  $m/z$  89,  $m/z$  91,  $m/z$  93,  $m/z$  95,  $m/z$  97,  $m/z$  99,  $m/z$  100,  $m/z$  101,  $m/z$  105,  $m/z$  107,  $m/z$  109,  $m/z$  119,  $m/z$  121,  $m/z$  123,  $m/z$  129,  $m/z$  135,  $m/z$  137,  $m/z$  149, and  $m/z$  205. This enabled us to examine also scope for any potential new interferences due to fragmentation/clustering effects and/or new emissions.

To rule out the possibility of any higher compounds fragmenting and contributing to the  $m/z$  63 signal in our dataset, we undertook correlation of all other monitored  $m/z$  at which measurable signal was observed with the  $m/z$  63, but found no significant correlation ( $r_s^2 \leq 0.2$ ) with any of them, which suggested that fragmentation of a larger volatile detected at higher mass to charge ratio was likely not responsible for the observed  $m/z$  63 signal. In particular, concerning the potential for other sulphur containing compounds such as dimethyl disulfide ( $\text{CH}_3\text{SSCH}_3$ , DMDS), and dimethyl trisulfide ( $\text{CH}_3\text{SSSCH}_3$ , DMTS), fragmenting and contributing to the  $m/z$  63 signal, we would like to note that the parent ions of these compounds would be detected at  $m/z$  95 and  $m/z$  127. As mentioned above we did monitor  $m/z$  95 in all the seasons but didn't monitor  $m/z$  127 in the experiments after summer season as we didn't see any signal at this  $m/z$  in the output air of the cuvette. We also could not find any previous report suggesting the possibility of these compounds fragmenting to  $m/z$  63 under standard operating conditions of the PTR-MS such as 135 Td at which we operated our PTR-QMS. On the contrary, a recent relevant study conducted using both GC-MS and PTR-TOF-MS (under similar range of operating conditions; 120-140 Td) for organosulfur compounds which included these compounds (Perraud et al., 2016), showed that dimethyl disulfide ( $\text{CH}_3\text{SSCH}_3$ , DMDS), and dimethyl trisulfide ( $\text{CH}_3\text{SSSCH}_3$ , DMTS) do not fragment and contribute to the  $m/z$  63 channel, at which DMS is detected. Our own mass scans and correlation analyses are also consistent with these findings and so we were able to rule out the possibility of such higher compounds fragmenting and contributing to the  $m/z$  63 signal in our dataset.

The issue of hydration of protonated acetaldehyde which can form the following ion:  $\text{H}^+(\text{CH}_3\text{CHO})\text{H}_2\text{O}$  (which has  $m/z$  63) and therefore could contribute to the  $m/z$  63 attributed to DMS required careful attention. This issue was first pointed out in the review by de Gouw and Warneke 2007 and further addressed adequately in the work by Jardine et al. 2015. The interference from this ion can be significant when both the hydrated hydronium ion and acetaldehyde concentrations are high leading to appreciable formation of  $\text{H}^+(\text{CH}_3\text{CHO})\text{H}_2\text{O}$  in the drift tube from reactions of the  $\text{H}^+(\text{CH}_3\text{CHO})$  with ( $\text{H}_2\text{O}^+\text{H}_2\text{O}$ ) ion. As shown in the work of Jardine et al. 2015, if the abundance of the hydrated hydronium ion ( $\text{H}_3\text{O}^+\text{H}_2\text{O}$ ) is therefore kept to just a few percent of the primary reagent ion namely the  $\text{H}_3\text{O}^+$  ion (circa 4 %), then at mixing ratios of less than 19 ppb acetaldehyde that occur in most ambient environments and well ventilated cuvette systems, this interference has been shown to be negligible (see for example results reported in the paper by Jardine et al. 2015, where even at acetaldehyde mixing ratios as high as 19 ppb, there was no measurable change in the  $m/z$  63 ion signal). We therefore took the above precaution of operating under

Formatted

Formatted: Font: Not Bold

Formatted

Formatted

high Townsend ratios (~135 Td) in the drift tube to minimize conditions that favour formation of clusters ions by enhancing kinetic energy of the reagent ions. During all our experiments, acetaldehyde mixing ratios were below 12 ppb and under our operating conditions (135 Td), the average  $\text{H}_2\text{O}^-$ ,  $\text{H}_2\text{O}^+$  to  $\text{H}_3\text{O}^+$  ratio was only 4.12 % for the entire dataset which is comparable to the 4% or lower abundance during experiments conducted by Jardine et al., 2015. Our dataset was further carefully examined for indications of this potential interference biasing the measured m/z 63 attribution to DMS. For this we plotted the 4 min averaged temporal resolution primary data for m/z 63 ion against the corresponding co-measured 4 min averaged temporal resolution primary m/z 45 ion data for all the seasons. The results are shown in Figure S4, where it can be seen that there was no significant correlation between the two ( $r = 0.22$ ) and even at high m/z 45 mixing ratios of 10 ppb, low m/z 63 mixing ratios of 0.2 ppb occurred frequently, which would not have been the case if the m/z 63 originated primarily from the acetaldehyde hydrated water ion cluster. Therefore, in view of the above, just like Jardine et al. 2015, we are confident that the potential interference of acetaldehyde on the DMS measurements was absent/negligible.

The attribution of isoprene to m/z 69 also requires careful attention and consideration of known interferences from isobaric compounds and fragments of higher ions. As mentioned in the excellent review by Yuan et al. 2017, several compounds can present substantial interferences in various environments, such as furan in biomass-burning plumes, cycloalkanes in urban environments and oil/gas regions, 2-methyl-3-buten-2-ol (MBO) in pine forests, and methylbutanals and 1-penten-3-ol from leaf-wound compounds. We examine one by one each of these possible interferences for the isoprene measurements reported in our dataset. Firstly, we note that many of the potential interferences that can affect the m/z 69 signal while sampling ambient air influenced by mixed combustion and biogenic sources are not relevant for our experimental set up as the output air from the branch cuvettes (after subtracting input air) is exclusively influenced by only biogenic emissions. Concerning the other biogenic emissions that could still be responsible for contributing to the m/z 69 signal measured by the PTR-MS, we could identify isoprene as the main contributor based on isoprene measurements in the output air of the cuvette obtained using a Thermal Desorption- Gas Chromatography-Flame Ionization Detector (TD-GC-FID) system simultaneously. Even though the data was semi-quantitative due to suspected-transfer losses noted subsequently within the GC system, they adequately prove that the air from the branch cuvette contained isoprene. Details of the chromatographic detection of isoprene (Figure S5) time series (Figure S6) and its correlation ( $r = 1$ ) (Figure S7) with the measured m/z 69 signal in the PTR-QMS for the monsoon season are provided in the supplement. When combined with the observed diurnal variability of the m/z 69 PTR-MS signal with PAR and temperature, and these additional observations using the TD-GC-FID, it is clear that no other known compound other than isoprene could satisfy all the above criteria. Hence m/z 69 was confidently attributed to isoprene.

The sum of monoterpenes can be detected using the PTR-QMS technique collectively at m/z 81 (major fragment ion) and m/z 137 with the typical fragmentation ratio ranging from 60-65 % at m/z 81 and 40-35% at m/z 137, depending on the structure of the major monoterpenes that contribute to the sum of the monoterpenes. For alpha-pinene, during our calibration experiments we found that at under the conditions we operated our PTR-MS (~135 Td), 65% of the signal landed at m/z 81 and 35 % at m/z 137. As we cannot rule that the major monoterpene emitted from Mahogany trees is not alpha-pinene, we

Formatted: Font: Not Bold

Formatted: Font: Not Bold, Subscript

Formatted: Font: Not Bold

Formatted: Font: Not Bold, Subscript

Formatted: Font: Not Bold

Formatted: Font: Not Bold, Superscript

Formatted: Font: Not Bold

Formatted: Font: Not Bold, Subscript

Formatted: Font: Not Bold

Formatted: Font: Not Bold, Superscript

Formatted: Font: Not Bold

chose to take the sum of m/z 81 and m/z 137 signals for quantifying the monoterpenes, instead of only m/z 137. Of course while doing so, one has to check that other isobaric ions due to compounds that are not monoterpenes do not contribute majorly to m/z 81. For this we examined the correlation between observed m81 and m137 signals from the plant chamber output air for all seasons. The results showed that m/z 81 originating from some ion other than m137, was unlikely ( $r=1$  between m/z 137 and m/z 81) for all seasons (see in Figure S8). The near perfect correlation also suggests that the composition of the monoterpenes was not different from one season to another because if different monoterpenes with different fragmentation ratios between m81 and m137 were emitted, all the points would not lie on the same line. The isotopic shoulder peaks (m/z 82 and m/z 138 due to natural C-13 abundance) shown in the mass spectra (Figure S3) were also consistent with ions originating from monoterpenes. Hence we could attribute the observed m/z 81 and m/z 137 ions to sum of monoterpenes emitted by Mahogany.

Carbon dioxide measurements were performed by sub-sampling air from the cuvette into a cavity ring down spectrometer (CRDS; Model G2508, Picarro, Santa Clara, USA) which has been described in previous works from our group (Chandra et al., 2017). The overall uncertainty for measurements of CO<sub>2</sub> was below 4%. The instrument was calibrated by dynamic dilution of a gas standard mixture (1998 ppm CO<sub>2</sub> in Nitrogen traceable to NIST, USA, 2 % uncertainty; Sigma gases, India) on 8 June 2018, 26 October 2018 and 24 January 2019.

### 3 Results and discussion

#### 3.1 Emission of BVOCs from Mahogany including light and temperature dependency

Figure 1 shows the average wintertime emission fluxes and variability (as standard deviation) from trees 2, 3 and 4 shown in comparison to the average flux and variability of tree 1. Earlier in Table 1, a summary of the sampling, PAR and temperature data for these experiments has already been provided. It can be observed that the observed hourly emission fluxes from Tree 1 (which was also sampled in three other seasons as mentioned in Section 2.1) were always within the observed one sigma variability of the emission fluxes for monoterpenes and isoprene obtained from Trees 2, 3 and 4 the observed hourly fluxes from Tree 1 (which was also sampled in other seasons) for monoterpenes and isoprene were always within the observed one sigma variability of the emission fluxes determined from Trees 2, 3 and 4. For DMS, the observed daytime emission fluxes from Tree 1 were at times lower than the 1 sigma variability range of the DMS flux observed from Trees 2, 3 and 4, and at the lower end of the observed emission fluxes from the other trees. This implies that the DMS fluxes obtained using Tree 1 do not overestimate the DMS emission fluxes for *Swietenia macrophylla*. Overall, based on comparison with three other replicate trees of Mahogany (trees 2, 3 and 4) for the wintertime data, one can surmise that there is no evidence of Tree1's emission profile and emission fluxes being anomalous.

Formatted: Font: Not Bold

Figure 2+ shows the measured hourly averaged emission flux from big leaf Mahogany normalized to leaf area for the sum of monoterpenes and isoprene (top panel), DMS (middle panel), photosynthetically active radiation, along with the temperature (bottom panel) during summer, monsoon, post-monsoon and winter. Clear diurnal variation was observed in the emission profiles of all three compounds in all seasons with emissions reducing to zero/negligible emission fluxes in all seasons at night when PAR was zero. Average temperatures were highest in summer ( $\sim 35 \pm 5^\circ\text{C}$ ), followed by the monsoon ( $\sim 30 \pm 8^\circ\text{C}$ ), post-monsoon ( $\sim 21 \pm 7^\circ\text{C}$ ) and winter season ( $\sim 13.5 \pm 7^\circ\text{C}$ ). Peak hourly PAR ranged from 0-1200  $\mu\text{mol m}^{-2}\text{s}^{-1}$  in all seasons except the post-monsoon where maximum hourly values remained below 900  $\mu\text{mol m}^{-2}\text{s}^{-1}$  on all days of sampling. The Kruskal-Wallis test results revealed that the temperature ( $p < 0.01$ ) and light intensities ( $p < 0.01$ ) in different seasons, as well as the corresponding BVOC emissions ( $p < 0.01$ ) are significantly different at 99 % confidence interval or more. Average temperatures were highest in summer ( $\sim 35^\circ\text{C}$ ), followed by the monsoon ( $\sim 30^\circ\text{C}$ ), post-monsoon ( $\sim 21^\circ\text{C}$ ) and winter season ( $\sim 13.5^\circ\text{C}$ ). Peak hourly PAR ranged from 0-1200  $\mu\text{mol m}^{-2}\text{s}^{-1}$  in all seasons except the post-monsoon where maximum hourly values remained below 900  $\mu\text{mol m}^{-2}\text{s}^{-1}$  on all days of sampling. Thus, emission fluxes obtained in this study covered a fairly large range of ambient temperature and light conditions. The summertime measurements were performed only for 52 hours, but comparison of the meteorological data for this period with the meteorological data before and after the sampling period showed that the sampling was carried out under conditions characteristic of the typical summer time conditions (low daytime RH and high temperature and PAR). Winter was associated with the lowest BVOC emission fluxes for monoterpenes and isoprene (avg for both  $< 0.05 \text{ nmol m}^{-2}\text{s}^{-1}$ ) as well as DMS (avg  $1.7 \text{ pmol m}^{-2}\text{s}^{-1}$ ), even though peak PAR values in winter were comparable to monsoon and summer other seasons. Thus, temperature was a major driver for emissions of all three compounds in the winter season. Thus, temperature was a major driver for emissions of all three compounds. Average monoterpene emission fluxes were highest in the monsoon season ( $2.3 \text{ nmol m}^{-2}\text{s}^{-1}$ ) followed by the post-monsoon ( $\sim 1.7 \text{ nmol m}^{-2}\text{s}^{-1}$ ) and summer season ( $\sim 1.5 \text{ nmol m}^{-2}\text{s}^{-1}$ ), revealing that Mahogany is a high monoterpene emitter comparable to the highest monoterpene emitting trees in the world such as oaks (<http://www.es.lancs.ac.uk/~cnhgroup/iso-emissions.pdf>) and actively so throughout the year. Average DMS emission fluxes were highest in summer season ( $\sim 8.2 \text{ pmol m}^{-2}\text{s}^{-1}$ ), closely followed by post-monsoon season ( $\sim 7.1 \text{ pmol m}^{-2}\text{s}^{-1}$ ) and monsoon season ( $\sim 5.3 \text{ pmol m}^{-2}\text{s}^{-1}$ ), with lowest emissions during the winter season ( $\sim 1.8 \text{ pmol m}^{-2}\text{s}^{-1}$ ). As most previous studies in the literature have reported emission fluxes of different tree species normalized to the leaf dry weight per hour in Table 1 we provide the average emission fluxes for each season in these units as well. In comparison, isoprene emission fluxes were significantly lower with average emission fluxes of only  $0.03 \text{ nmol m}^{-2}\text{s}^{-1}$  being observed during summer, monsoon and post-monsoon. The time series of BVOC mixing ratios in output air of the cuvette alongwith the background mixing ratios in input air are shown in Figure S9 for Tree 1 and Figure S11 for Trees 2,3 and 4, Figure S10 shows the wintertime BVOC emission fluxes for Trees 2,3 and 4 along with PAR and temperature. (expressed in nanomols or picomols per leaf area per second). The time series of the measured BVOC mixing ratios have also been provided in Fig. S2 for perusal. The emission profiles of monoterpenes and isoprene co-varied and correlated strongly in all seasons ( $r^2 \geq 0.8$  with  $r^2 \geq 0.9$  during summer and monsoon). This indicates that their emissions arise from common pathways in Mahogany and that fresh photosynthetically fixed carbon may be more important than emissions from stored pools (Monson et al., 1995). DMS

Formatted: Font: Not Italic

Formatted: Font: Not Italic

emissions also correlated with the terpene emissions in all seasons except winter ( $r^2 = 0.2$ ) but were much weaker ( $0.4 \leq r^2 \leq 0.5$ ).

Whereas databases now exist concerning isoprene and monoterpene emission potential of trees, and also many studies have shown that monoterpene and isoprene emissions depend on the plant functional type, PAR availability, temperature and to a lesser extent soil moisture (Kesselmeier and Staudt, 1999; Guenther et al., 1996) (<http://www.es.lancs.ac.uk/~cnhgroup/iso-emissions.pdf>), there are very few studies in the literature reporting DMS emissions from terrestrial plants and ecosystems (Kesselmeier et al., 1993; Yonemura et al., 2005; Geng and Mu, 2006), with even less known about the factors that control DMS emissions (Jardine et al., 2015). Hourly averaged DMS emission flux from Mahogany was found to vary between a maximum of  $15.7 \text{ pmol m}^{-2} \text{ s}^{-1}$  in winter to  $48.2 \text{ pmol m}^{-2} \text{ s}^{-1}$  in the post-monsoon seasons and were much higher than the maximum flux of  $26 \text{ pmol m}^{-2} \text{ s}^{-1}$  observed from Hibiscus sp (Yonemura et al., 2005) or the DMS branch emission measurements made from seven tropical plant species (max  $\sim 6 \text{ pmol m}^{-2} \text{ s}^{-1}$ ) within a large, enclosed rainforest mesocosm in Arizona, USA (Jardine et al., 2015) and the Geng and Mu (2006) study in China (max  $\sim 2 \text{ pmol m}^{-2} \text{ s}^{-1}$ ). We note that in all these previous studies the range of temperature and PAR covered while measuring the DMS were significantly lower, with the temperature never exceeding  $30^\circ\text{C}$  and PAR lower than  $140 \text{ } \mu\text{mol m}^{-2} \text{ s}^{-1}$  in the Jardine et al. 2015 study and less than  $500 \text{ } \mu\text{mol m}^{-2} \text{ s}^{-1}$  in the Yonemura et al., 2005 study, respectively.

To investigate the factors driving the emissions of monoterpenes, isoprene, and DMS in different seasons from Mahogany, we examined the relationship between the cumulative BVOC emission flux of these compounds with respect to the cumulative  $\text{CO}_2$  assimilation flux ( $A_{\text{net}}$ ) starting from the sunrise of each day. Cumulative emission fluxes were calculated for every hour of the day and accumulated from sunrise until that hour. This is helpful as  $A_{\text{net}}$  is a good proxy for the rate of photosynthesis and a recent  $^{13}\text{C}$ -pulsed labeling study has shown that newly assimilated carbon can be emitted as monoterpenes within one hour (Huang et al., 2018). Further, depending on whether the tree's growth is in the reproductive or vegetative phase (Huijser & Schmid 2011), the assimilated carbon can be allocated differently impacting the emitted BVOC flux. For example, one could expect that in the constitutive growth phase, emissions of BVOCs would be lower whereas, in the reproductive phase, when flowering and fruiting occur, due to the important functional roles BVOCs play in attracting pollinators and for plant defence, there would be increased emissions of BVOCs (Peñuelas, 2003). Mahogany is known to bear fruits during the monsoon season (Gullison et al., 1996) and trees emit odorous compounds like terpenes for defence purposes especially against herbivores and abiotic stresses like high-intensity light, temperature. Hence the enhanced emission of BVOCs during the monsoon and post-monsoon seasons is likely due to these reasons. This diversion of the carbon allocation for such purposes can decrease growth by diverting photosynthates from the production vegetative structures (Herms and Mattson, 1992). Henceforth, the two distinct phases are referred to as the vegetative growth phase when the carbon allocation to BVOC synthesis is low and reproductive growth phase, when the carbon allocation by the tree to synthesize BVOCs is high. The results are shown in Figure 2(a) for monoterpenes, isoprene, and DMS. Distinct linear relationships were observed for the emissions of all three BVOCs with higher emissions during the reproductive phase (monsoon and post-monsoon seasons) and lower emissions in the vegetative phase (summer and winter seasons) for the same amount of cumulative assimilated carbon.



It is interesting to note that DMS flux also shows this pattern in the two phases which suggests that DMS emission could be linked to these functional roles as well, in addition to being dependent upon the uptake of COS, the latter of which has been previously reported to be similar to uptake of carbon dioxide during photosynthesis (Jardine et al., 2015).

Global BVOC emission models such as MEGAN - Model of Emissions of Gases and Aerosols from Nature (Guenther et al.,

2012) use PAR and ambient temperature dependence of major plant functional types to calculate BVOC emissions. Thus, it is meaningful to examine if one can obtain a parameterization of the monoterpene, isoprene, and DMS flux from big leaf Mahogany trees in terms of PAR and temperature. Figure 32(b) shows 3-D surface plots illustrating the dependence of BVOC emission flux as a function of instantaneous chamber temperature and PAR in the vegetative growth phase. In the vegetative phase, terpenes varied exponentially with respect to the two meteorological drivers. It is also evident that DMS has a strong dependence on temperature, but not on PAR. DMS peaked during high temperatures even when PAR was only  $200 \mu\text{mol m}^{-2}\text{s}^{-1}$ . However, the dependence of DMS flux on temperature is not always followed possibly because the DMS flux is dependent upon the uptake of COS or on the internal sulphur content. From Figure 3 b it also appears that the temperature has no effect on the DMS emission flux at low PAR ( $< 400 \mu\text{mol m}^{-2}\text{s}^{-1}$ ). We constructed best bivariate fit functions by expressing the emission flux as an exponential function of both temperature and PAR for the vegetative growth phase and as a linear function of PAR, and an exponential function of temperature in the reproductive growth phase to better formulate the dependence of the BVOC emissions on these meteorological parameters.

Table 2 shows the fit functions and their coefficients for BVOC flux parameterizations as a function of PAR and temperature in both the reproductive and vegetative phases of Mahogany. The temperature dependent coefficient in the reproductive growth phase (c) is much lower than the temperature dependent coefficient in the vegetative growth phase (d). This implies that during the reproductive phase plant emits higher BVOCs with less temperature increment than during the vegetative phase and is in agreement with our earlier observation regarding the higher carbon allocation for the BVOC synthesis and emission during the reproductive growth phase.

Figure 32(c) shows the modeled BVOC emission fluxes and measured BVOC emission fluxes for all the seasons. The observed temperature and PAR data during the experiments were used to calculate the modeled flux using the bivariate fit function for the two growth phases. We found that the measured flux can be predicted only if both the functions are used to calculate the modeled flux of the respective phase. Modeled DMS showed deviations from measured flux which may be attributed to irregularity in the dependence on high temperature but currently in the absence of knowledge concerning the exact pathways responsible for DMS emission, the reasons remain unclear. Still, the finding that vegetative growth and reproductive growth phases require different modeling functions, point to the need for considering the phenological cycle changes of plants in annual emissions as these can result in a significant increase or decrease in the modeled BVOC emissions from similar vegetation. These parameterizations provide a way to simulate Mahogany emissions even in global BVOC emission models that already use the PAR and temperature data for simulation of BVOC emissions.

Formatted: Superscript

Formatted: Superscript

### 3.3 Estimates of global annual emissions of monoterpene, isoprene, and DMS from Mahogany

Table 43 shows the distribution of Mahogany in natural forests and in plantations in terms of ground area, density, leaf area and calculated annual emission fluxes of monoterpenes, isoprene, and DMS for several countries, based on the documented area under Mahogany tree cover. First, the Mahogany tree cover was estimated using the available data regarding the natural forest and plantation cover in different countries around the globe (Blundell, 2004;Lugo et al., 2003;Mohandas, 2000). Forest cover was multiplied by the density of Mahogany trees reported in those countries (Gullison et al., 1996;Lugo et al., 2003;Gillies et al., 1999;Grogan et al., 2008;Kammesheidt et al., 2001) to estimate the total number of Mahogany trees in the world. The total crown size was calculated using the equation provided by a pioneering study by Gullison et al. (1996), assuming the median diameter at breast height (DBH) to be 80 cm in forests. This was multiplied by leaf area index (LAI) (Jhou et al., 2017) to obtain the leaf area. For plantations where density was unavailable, the plantation area was multiplied by LAI to obtain the leaf area. The annual emission fluxes were calculated assuming six months of reproductive and vegetative phase each, and the average measured emission fluxes normalized to leaf area obtained in our study for each of these phases. The Table lists both natural and plantation area cover for Mahogany, and it can be seen that Brazil and several other regions in South America stand out with Brazil alone having more than 1.4 million square kilometres of Mahogany tree cover. In terms of large planted tree areas, several regions in Asia such as Indonesia and the Philippines stand out. We would like to point out that this estimate is based on the current available information but there may be some underestimation as there are areas where cultivation of Mahogany trees is known to occur (e.g. Jim Corbett national park in India), for which, however, accurate Mahogany biomass estimates are not yet available and which hence were not included in Table 4.~~We would like to point out that this list is by no means comprehensive and there may be many more areas from where data are not currently available but where Mahogany trees are being cultivated on large scales for the wood industry or as natural forest reserves such as the Jim Corbett national park in India.~~ The list is nonetheless useful to identify regions where the influence of DMS and monoterpene emissions from Mahogany are important to consider for regional air quality and climate, through aerosol and oxidant chemistry feedbacks. In this context, recent ecosystem scale DMS emissions reported over the rainforest in South America (Jardine et al., 2015) could indeed be partially explained by the contribution of DMS emissions from Mahogany growing in the rainforest and surrounding areas. Further, high monoterpene and DMS emissions from Mahogany would also contribute through the formation of aerosol particles. Our estimates indicate global yearly DMS emissions of 370-550 Mg from Mahogany alone. Further, as the cultivation of Mahogany is gaining popularity in southern Asia and are already significant in Indonesia and Fiji due to huge plantations, focused studies on the regional impact of these plantations through BVOC feedbacks to climate and air quality are warranted. Based on results obtained in this study, *Swietenia macrophylla* is estimated to also emit 210-320 Gg yr<sup>-1</sup> of monoterpenes globally, with most of the emissions concentrated in specific regions of South America, Asia, and North America. The total isoprene emission flux does not seem to be of much consequence for the global budget of isoprene as it amounted to only 2600 Mg yr<sup>-1</sup> but could still be of significance regionally as a dominant isoprene source, and require further investigations.

#### 4 Conclusions

In this study, BVOC emissions of monoterpenes, isoprene and DMS were determined in four different seasons at branch level from *Swietenia macrophylla* King (also called big leaf Mahogany) growing in their natural ~~outdoor~~ environment in India. The emissions were characterized in terms of environmental response functions such as temperature, radiation and physiological growth phases. Branch level measurements revealed remarkably high emissions of DMS (average in post monsoon:  $\sim 19 \text{ ng/g}^{-1}$  leaf dry weight/hr) relative to previous known tree DMS emissions, high monoterpenes (average in monsoon:  $\sim 15 \text{ } \mu\text{g/g}^{-1}$  leaf dry weight/hr) which are comparable to high emitters such as oak trees) and low emissions of isoprene ( $< 0.09 \text{ } \mu\text{g/g}^{-1}$  leaf dry weight/hr). Distinct linear relationships were observed between cumulative BVOC emissions and the cumulative assimilated carbon with higher emissions during the reproductive phase (monsoon and post-monsoon seasons) and lower emissions in the vegetative phase (summer and winter seasons) for the same amount of cumulative assimilated carbon. Temperature and PAR dependency of the BVOC emissions enabled formulation of a new parametrization that can be employed in global BVOC emission models. Using the measured seasonal **emission** fluxes, we provide the first global emission estimates from Mahogany trees of circa 210-320 Gg yr<sup>-1</sup> for monoterpenes, 370-550 Mg yr<sup>-1</sup> for DMS and 1700-2600 Mg yr<sup>-1</sup> for isoprene.

While several novel insights have been obtained from this study such as discovery of a new terrestrial source with high emissions for monoterpenes and DMS relative to other known terrestrial sources, one limitation has been the lack of data from replicates for three of the four seasons. Based on comparison with three other replicate trees of Mahogany (Trees 2, 3 and 4) for the wintertime data, one can surmise that there is no evidence of Tree1's emission profile and emission fluxes being anomalous and hence considering the paucity of what is known about DMS seasonal emissions from trees (this study to the best of our knowledge contains first such information on seasonal emission tendencies), the insights about seasonality of Mahogany emissions obtained in this study are also valuable. We acknowledge, however that data from more replicates would be better to characterize the intra-species and seasonal emissions variability better and should be addressed in future studies.

Since Mahogany has a large vegetation cover in the Mesoamerican forests and is gaining popularity in South Asia due to its economic significance, large-scale emissions through land use land cover changes from this species could have a significant impact on local and regional atmospheric chemistry. Finally, through the results obtained in this study, we have been able to discover and identify Mahogany as one of the missing natural sources of ambient DMS over the Amazon rainforest as well. These new emission findings, seasonal patterns, and estimates will be useful for initiating new studies to further improve the global BVOC terrestrial budget.

**Data availability.** Data is available from the corresponding author upon request

**Author contributions.** V.S. and B.S. conceived and designed the study. L.V. carried out this work as part of his MS thesis under the supervision of V.S.. L.V. performed PTR-MS measurements with help from H.H. and carried out preliminary analysis and wrote the first draft. V.S. revised the paper and carried out advanced analyses and interpretation of the data and supervised all experimental aspects of the work. S.D., A.K., H.H. and P.Y. contributed to the plant cuvette sampling experiments and CRDS measurements. B.S. commented on the revised draft and helped with compilation of Table 43. [We thank the two anonymous reviewers for their helpful suggestions and insightful comments which helped to improve the discussion paper.](#)

**Competing interests.** The authors have no competing interests to declare.

**Acknowledgements.** We acknowledge the IISER Mohali Atmospheric Chemistry facility for data and the Ministry of Human Resource Development (MHRD), India for funding the facility. L.V. and P.Y., A.K., H.H. acknowledge IISER Mohali for MS fellowships and Institute PhD fellowships while S.D. acknowledges UGC for Ph.D fellowship. This work was carried out under the National Mission on Strategic knowledge for Climate Change (NMSKCC) MRDP Program of the Department of Science and Technology, India vide grant (SPLICE) DST/CCP/MRDP/100/2017(G). We acknowledge EGU for waiver of the APC through the EGU 2019 OSPP award to L.V.

## References

- 20 Andreae, M. O., and Crutzen, P. J.: Atmospheric aerosols: Biogeochemical sources and role in atmospheric chemistry, *Science*, 276, 1052-1058, 10.1126/science.276.5315.1052, 1997.
- Atkinson, R., and Arey, J.: Gas-phase tropospheric chemistry of biogenic volatile organic compounds: a review, *Atmospheric Environment*, 37, 197-219, 10.1016/s1352-2310(03)00391-1, 2003.
- Blundell, A. G.: A review of the CITES listing of big-leaf Mahogany, *Oryx*, 38, 84-90, 10.1017/s0030605304000134, 2004.
- 25 Chandra, B. P., Sinha, V., Hakkim, H., and Sinha, B.: Storage stability studies and field application of low cost glass flasks for analyses of thirteen ambient VOCs using proton transfer reaction mass spectrometry, *International Journal of Mass Spectrometry*, 419, 11-19, 10.1016/j.ijms.2017.05.008, 2017.
- Charlson, R. J., Lovelock, J. E., Andreae, M. O., and Warren, S. G.: Oceanic phytoplankton, atmospheric sulphur, cloud albedo and climate, *Nature*, 326, 655-661, 10.1038/326655a0, 1987.
- 30 de Gouw, J., and Warneke, C.: Measurements of volatile organic compounds in the earth's atmosphere using proton-transfer-reaction mass spectrometry, *Mass Spectrom Rev*, 26, 223-257, 10.1002/mas.20119, 2007.
- Fehsenfeld, F., Calvert, J., Fall, R., Goldan, P., Guenther, A. B., Hewitt, C. N., Lamb, B., Liu, S., Trainer, M., Westberg, H., and Zimmerman, P.: Emissions of volatile organic compounds from vegetation and the implications for atmospheric chemistry, *Global Biogeochemical Cycles*, 6, 389-430, 10.1029/92gb02125, 1992.
- 35 Geng, C., and Mu, Y.: Carbonyl sulfide and dimethyl sulfide exchange between trees and the atmosphere, *Atmospheric Environment*, 40, 1373-1383, 10.1016/j.atmosenv.2005.10.023, 2006.
- Gillies, A. C. M., Navarro, C., Lowe, A. J., Newton, A. C., Hernandez, M., Wilson, J., and Cornelius, J. P.: Genetic diversity in Mesoamerican populations of Mahogany (*Swietenia macrophylla*), assessed using RAPDs, *Heredity*, 83, 722-732, 10.1046/j.1365-2540.1999.00626.x, 1999.

- Goldstein, A. H., Koven, C. D., Heald, C. L., and Fung, I. Y.: Biogenic carbon and anthropogenic pollutants combine to form a cooling haze over the southeastern United States, *Proceedings of the National Academy of Sciences*, 106, 8835-8840, 10.1073/pnas.0904128106, 2009.
- Grogan, J., and Barreto, P.: Big-Leaf Mahogany on CITES Appendix II: Big Challenge, Big Opportunity, *Conservation Biology*, 19, 973-976, doi:10.1111/j.1523-1739.2005.00086.x, 2005.
- 5 Grogan, J., Jennings, S. B., Landis, R. M., Schulze, M., Baima, A. M. V., Lopes, J. d. C. A., Norghauer, J. M., Oliveira, L. R., Pantoja, F., Pinto, D., Silva, J. N. M., Vidal, E., and Zimmerman, B. L.: What loggers leave behind: Impacts on big-leaf Mahogany (*Swietenia macrophylla*) commercial populations and potential for post-logging recovery in the Brazilian Amazon, *Forest Ecology and Management*, 255, 269-281, 10.1016/j.foreco.2007.09.048, 2008.
- 10 Guenther, A., Hewitt, C. N., Erickson, D., Fall, R., Geron, C., Graedel, T., Harley, P., Klinger, L., Lerdau, M., McKay, W. A., Pierce, T., Scholes, B., Steinbrecher, R., Tallamraju, R., Taylor, J., and Zimmerman, P.: A global model of natural volatile organic compound emissions, *Journal of Geophysical Research*, 100, 8873-8892, 10.1029/94jd02950, 1995.
- Guenther, A., Zimmerman, P., Klinger, L., Greenberg, J., Ennis, C., Davis, K., Pollock, W., Westberg, H., Allwine, G., and Geron, C.: Estimates of regional natural volatile organic compound fluxes from enclosure and ambient measurements, *Journal of Geophysical Research: Atmospheres*, 101, 1345-1359, 1996.
- 15 Guenther, A. B., Jiang, X., Heald, C. L., Sakulyanontvittaya, T., Duhl, T., Emmons, L. K., and Wang, X.: The Model of Emissions of Gases and Aerosols from Nature version 2.1 (MEGAN2.1): an extended and updated framework for modeling biogenic emissions, *Geoscientific Model Development*, 5, 1471-1492, 10.5194/gmd-5-1471-2012, 2012.
- Gullison, R. E., Panfil, S. N., Strouse, J. J., and Hubbell, S. P.: Ecology and management of Mahogany (*Swietenia macrophylla* King) in the Chimanes Forest, Beni, Bolivia, *Botanical Journal of the Linnean Society*, 122, 9-34, 10.1111/j.1095-8339.1996.tb02060.x, 1996.
- 20 Herms, D. A., and Mattson, W. J.: The Dilemma of Plants: To Grow or Defend, *The Quarterly Review of Biology*, 67, 283-335, 10.1086/417659, 1992.
- Huang, J., Hartmann, H., Hellen, H., Wisthaler, A., Perreca, E., Weinhold, A., Rucker, A., van Dam, N. M., Gershenzon, J., Trumbore, S., and Behrendt, T.: New Perspectives on CO<sub>2</sub>, Temperature, and Light Effects on BVOC Emissions Using Online Measurements by PTR-MS and Cavity Ring-Down Spectroscopy, *Environ Sci Technol*, 52, 13811-13823, 10.1021/acs.est.8b01435, 2018.
- 25 [Huijser, P., and Schmid, M., The control of developmental phase transitions in plants, \*Development\* 138, 4117-4129 \(2011\) doi:10.1242/dev.063511](#)
- Jardine, K., Yañez-Serrano, A. M., Williams, J., Kunert, N., Jardine, A., Taylor, T., Abrell, L., Artaxo, P., Guenther, A., Hewitt, C. N., House, E., Florentino, A. P., Manzi, A., Higuchi, N., Kesselmeier, J., Behrendt, T., Veres, P. R., Derstroff, B., Fuentes, J. D., Martin, S. T., and Andreae, M. O.: Dimethyl sulfide in the Amazon rain forest, *Global Biogeochemical Cycles*, 29, 19-32, 10.1002/2014gb004969, 2015.
- 30 Jhou, H. C., Wang, Y. N., Wu, C. S., Yu, J. C., and Chen, C. I.: Photosynthetic gas exchange responses of *Swietenia macrophylla* King and *Melia azedarach* L. plantations under drought conditions, *Bot Stud*, 58, 57, 10.1186/s40529-017-0212-8, 2017.
- Kammesheid, L., Lezama, A. T., Franco, W., and Plonczak, M.: History of logging and silvicultural treatments in the western Venezuelan plain forests and the prospect for sustainable forest management, *Forest Ecology and Management*, 148, 1-20, 10.1016/s0378-1127(00)00529-6, 2001.
- 35 Kappers, I. F., Hoogerbrugge, H., Bouwmeester, H. J., and Dicke, M.: Variation in herbivory-induced volatiles among cucumber (*Cucumis sativus* L.) varieties has consequences for the attraction of carnivorous natural enemies, *J Chem Ecol*, 37, 150-160, 10.1007/s10886-011-9906-7, 2011.
- Kavouras, I. G., Mihalopoulos, N., and Stephanou, E. G.: Formation of atmospheric particles from organic acids produced by forests, *Nature*, 395, 683-686, 10.1038/27179, 1998.
- 40 Kesselmeier, J., Meixner, F. X., Hofmann, U., Ajavon, A.-L., Leimbach, S., and Andreae, M. O.: Reduced sulfur compound exchange between the atmosphere and tropical tree species in southern Cameroon, *Biogeochemistry*, 23, 23-45, 10.1007/BF00002921, 1993.
- Kesselmeier, J., and Staudt, M.: Biogenic volatile organic compounds (VOC): an overview on emission, physiology and ecology, *Journal of atmospheric chemistry*, 33, 23-88, 1999.
- Kumar, V., Chandra, B., and Sinha, V.: Large unexplained suite of chemically reactive compounds present in ambient air due to biomass fires, *Scientific reports*, 8, 626, 2018.
- 45 Lindinger, W., and Jordan, A.: Proton-transfer-reaction mass spectrometry (PTR-MS): on-line monitoring of volatile organic compounds at pptv levels, *Chemical Society Reviews*, 27, 347-375, 1998.
- Loreto, F., Forster, A., Durr, M., Csiky, O., and Seufert, G.: On the monoterpene emission under heat stress and on the increased thermotolerance of leaves of *Quercus ilex* L. fumigated with selected monoterpenes, *Plant, Cell and Environment*, 21, 101-107, 10.1046/j.1365-3040.1998.00268.x, 1998.
- 50 Lovelock, J. E., Maggs, R. J., and Rasmussen, R. A.: Atmospheric Dimethyl Sulphide and the Natural Sulphur Cycle, *Nature*, 237, 452-453, 10.1038/237452a0, 1972.
- Lugo, A. E., Figueroa Colón, J. C., and Alayón, M.: Big-Leaf Mahogany, *Ecological Studies*, Springer Science & Business Media, 2003.
- Mayhew, J. E., Andrew, M., Sandom, J. H., Thayaparan, S., and Newton, A. C.: Silvicultural Systems for Big-Leaf Mahogany Plantations, in: *Big-Leaf Mahogany: Genetics, Ecology, and Management*, edited by: Lugo, A. E., Figueroa Colón, J. C., and Alayón, M., Springer New York, New York, NY, 261-277, 2003.

- Mohandas, K.: Management of the shoot borer *hypsipylarobusta* (lepidoptera: phycitidae) in Mahogany plantations, KFRI Peechi, Peechi, Kerala, India, 19, 2000.
- Monson, R. K., Lerdau, M. T., Sharkey, T. D., Schimel, D. S., and Fall, R.: Biological aspects of constructing volatile organic compound emission inventories, *Atmospheric Environment*, 29, 2989-3002, 10.1016/1352-2310(94)00360-W, 1995.
- 5 Niinemets, Ü., Kuhn, U., Harley, P. C., Staudt, M., Arneth, A., Cescatti, A., Ciccioli, P., Copolovici, L., Geron, C., Guenther, A., Kesselmeier, J., Lerdau, M. T., Monson, R. K., and Peñuelas, J.: Estimations of isoprenoid emission capacity from enclosure studies: measurements, data processing, quality and standardized measurement protocols, *Biogeosciences*, 8, 2209-2246, 10.5194/bg-8-2209-2011, 2011.
- Ortega, J., and Helmig, D.: Approaches for quantifying reactive and low-volatility biogenic organic compound emissions by vegetation enclosure techniques - part A, *Chemosphere*, 72, 343-364, 10.1016/j.chemosphere.2007.11.020, 2008.
- 10 Ortega, J., Helmig, D., Daly, R. W., Tanner, D. M., Guenther, A. B., and Herrick, J. D.: Approaches for quantifying reactive and low-volatility biogenic organic compound emissions by vegetation enclosure techniques - part B: applications, *Chemosphere*, 72, 365-380, 10.1016/j.chemosphere.2008.02.054, 2008.
- Perraud, V., Meinardi, S., Blake, D. R., and Finlayson-Pitts, B. J.: Challenges associated with the sampling and analysis of organosulfur compounds in air using real-time PTR-ToF-MS and offline GC-FID, 10.5194/amt-9-1325-2016, 2016.
- 15 Peñuelas, J.: BVOCs: plant defense against climate warming?, *Trends in Plant Science*, 8, 105-109, 10.1016/s1360-1385(03)00008-6, 2003.
- Sharkey, T. D., and Singsaas, E. L.: Why plants emit isoprene, *Nature*, 374, 769-769, 10.1038/374769a0, 1995.
- Sinha, V., Williams, J., Meyerhöfer, M., Riebesell, U., Paulino, A. I., and Larsen, A.: Air-sea fluxes of methanol, acetone, acetaldehyde, isoprene and DMS from a Norwegian fjord following a phytoplankton bloom in a mesocosm experiment, *Atmospheric Chemistry and Physics*, 7, 739-755, 10.5194/acp-7-739-2007, 2007.
- 20 Sinha, V., Kumar, V., and Sarkar, C.: Chemical composition of pre-monsoon air in the Indo-Gangetic Plain measured using a new air quality facility and PTR-MS: high surface ozone and strong influence of biomass burning, *Atmospheric Chemistry and Physics*, 14, 5921-5941, 10.5194/acp-14-5921-2014, 2014.
- Stefels, J.: Physiological aspects of the production and conversion of DMSP in marine algae and higher plants, *Journal of Sea Research*, 43, 183-197, 10.1016/s1385-1101(00)00030-7, 2000.
- 25 Tani, A., Hayward, S., and Hewitt, C.: Measurement of monoterpenes and related compounds by proton transfer reaction-mass spectrometry (PTR-MS), *International Journal of Mass Spectrometry*, 223, 561-578, 10.1016/S1387-3806(02)00880-1, 2003.
- Unger, N.: On the role of plant volatiles in anthropogenic global climate change, *Geophysical Research Letters*, 41, 8563-8569, 10.1002/2014gl061616, 2014.
- 30 Varshney, C. K., and Singh, A. P.: Isoprene emission from Indian trees, *J. Geophys. Res.*, 108(D24), 4803, doi:10.1029/2003JD003866, 2003.
- Vickers, C. E., Gershenzon, J., Lerdau, M. T., and Loreto, F.: A unified mechanism of action for volatile isoprenoids in plant abiotic stress, *Nat Chem Biol*, 5, 283-291, 10.1038/nchembio.158, 2009.
- Ward, S. E., Boshier, D., and Grogan, J.: Sustainable management of high-value timber species of the Meliaceae-Introduction, *Forest Ecology and Management*, 255, 265-268, 10.1016/j.foreco.2007.09.047, 2008.
- 35 Watts, S. F.: The mass budgets of carbonyl sulfide, dimethyl sulfide, carbon disulfide and hydrogen sulfide, *Atmospheric Environment*, 34, 761-779, 10.1016/s1352-2310(99)00342-8, 2000.
- Yonemura, S., Sandoval-Soto, L., Kesselmeier, J., Kuhn, U., Von Hobe, M., Yakir, D., and Kawashima, S.: Uptake of carbonyl sulfide (COS) and emission of dimethyl sulfide (DMS) by plants, *Phyton*, 45, 17-24, 10.5194/bg-9-2935-2012, 2005.
- Yuan, B., Koss, A. R., Warneke, C., Coggon, M., Sekimoto, K., and de Gouw, J. A.: Proton-Transfer-Reaction Mass Spectrometry: Applications in Atmospheric Sciences, *Chem Rev*, 117, 13187-13229, 10.1021/acs.chemrev.7b00325, 2017.
- 40



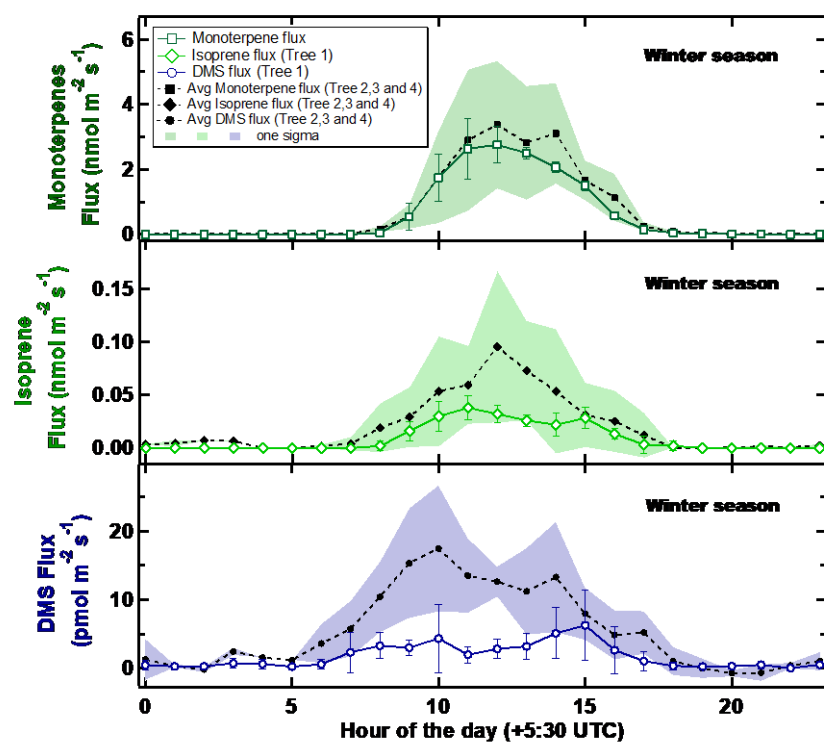

**Figure 1.** Average wintertime emission fluxes and variability (as standard deviation) for Trees 2, 3 and 4 shown in comparison to average flux and variability of Tree 1

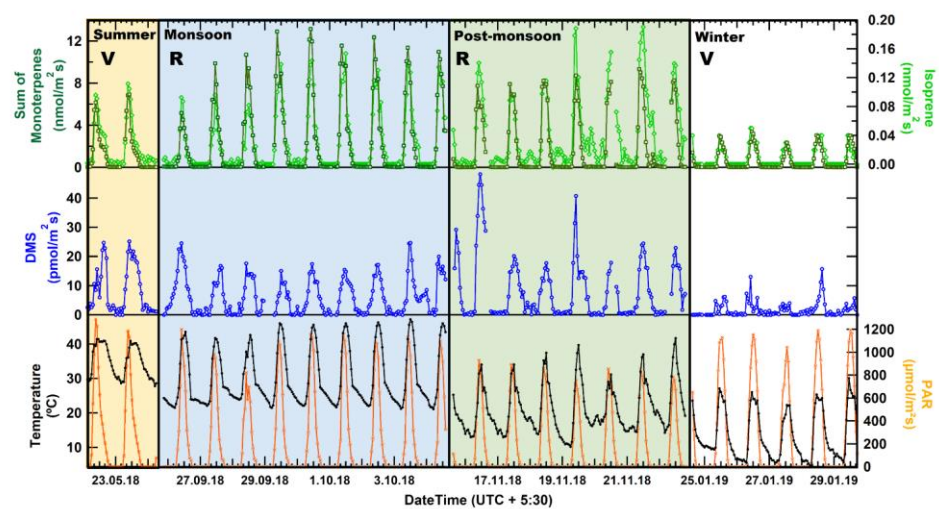

Figure 1: BVOC emission fluxes along with PAR and temperature. (expressed in nanomols or picomols per leaf area per second).  
R: Reproductive growth phase V: Vegetative growth phase.

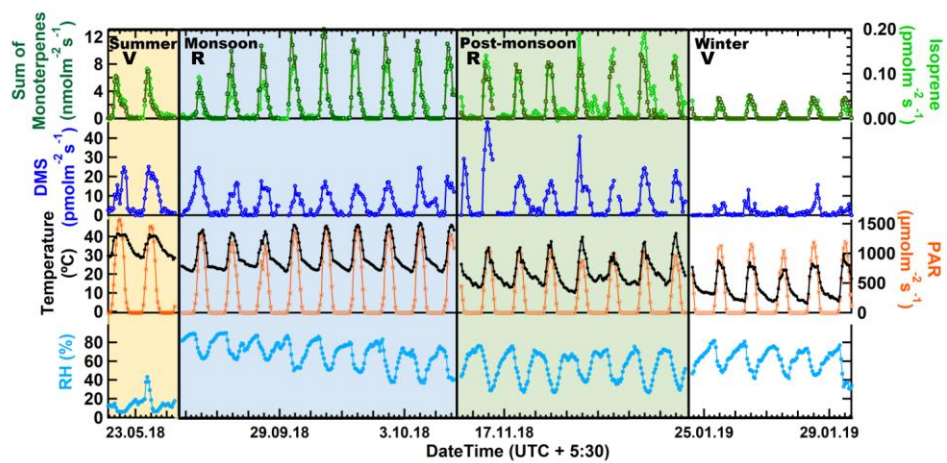

Figure 2: BVOC emission fluxes (expressed in nanomols or picomols per (m<sup>2</sup>) leaf area per second) along with PAR and temperature and relative humidity. R: Reproductive growth phase V: Vegetative growth phase.

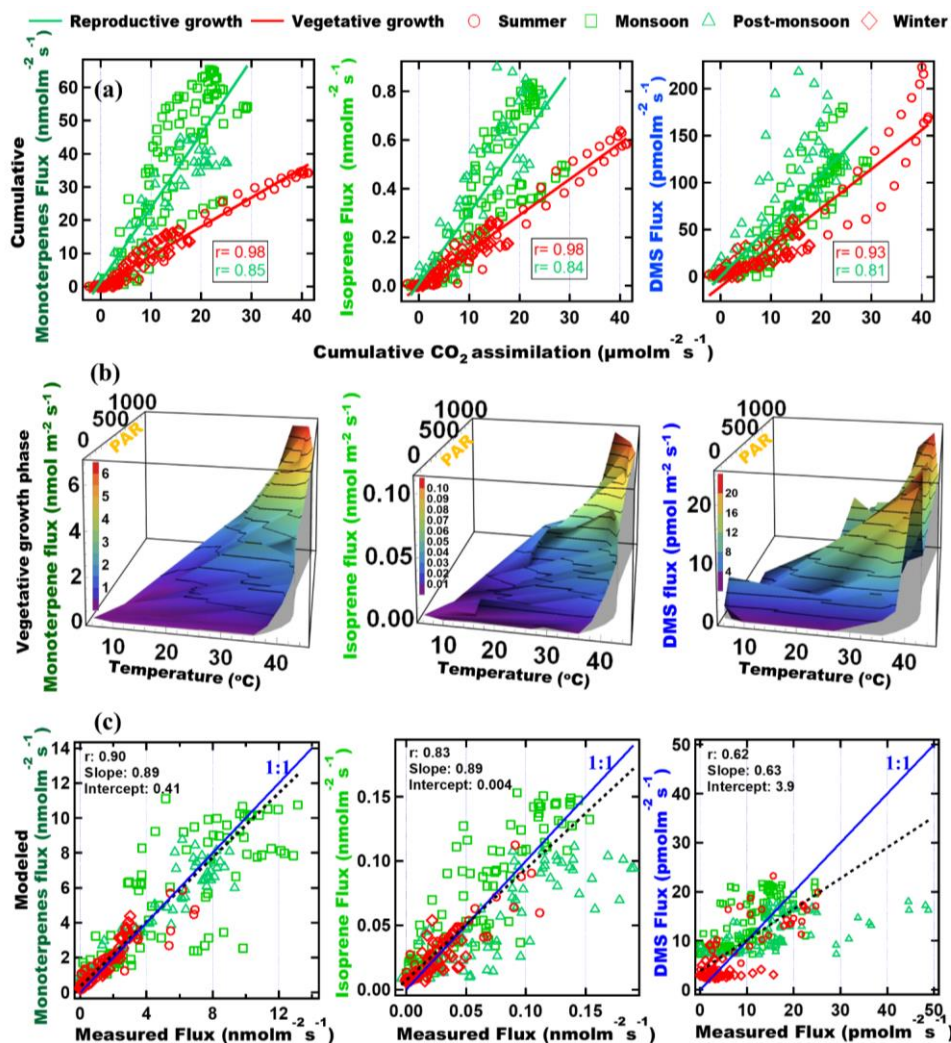

Figure 2(a): Cumulative BVOC fluxes versus cumulative  $\text{CO}_2$  assimilation, (b) 3-D plot showing the correlation of the fluxes with instantaneous-chamber-temperature and PAR for vegetative-growth phase and (c) Modeled versus measured VOC fluxes using parameterization presented in Table 2.

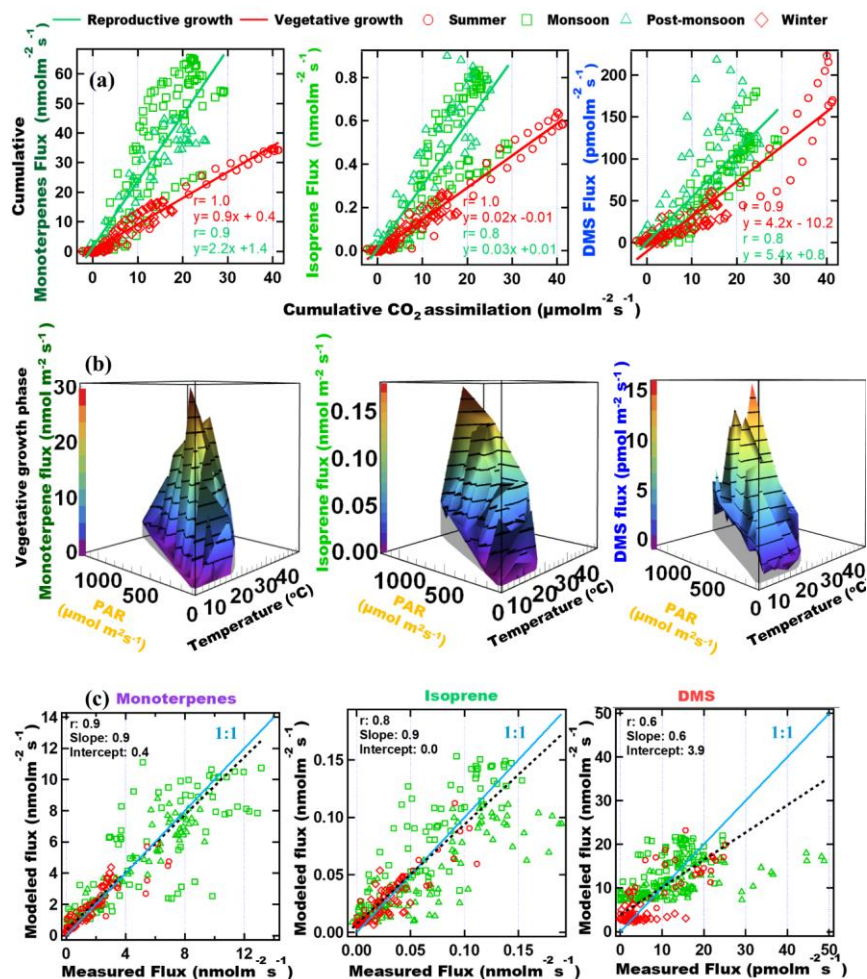

Figure 3(a): Cumulative BVOC emission fluxes versus cumulative CO<sub>2</sub> assimilation. Cumulative fluxes were calculated for every hour of the day and accumulated from sunrise until that hour, (b) 3-D plot showing the correlation of the emission fluxes with instantaneous chamber temperature and PAR for vegetative growth phase and (c) Modeled versus measured VOC emission fluxes using parameterization presented in Table 3

Formatted: Font: 10 pt

Table 1. Summary of the sampling details of all the four trees with average temperature, photosynthetic active radiation (PAR) and variability as standard deviation of the average in parantheses

| <u>TREE</u>                    | <u>Time period</u>           | <u>Temperature (°C)</u><br><u>avg(variability)</u> | <u>PAR (μmol m<sup>-2</sup>s<sup>-1</sup>)</u><br><u>avg (variability)</u> |
|--------------------------------|------------------------------|----------------------------------------------------|----------------------------------------------------------------------------|
| <u>Tree 1 (Winter)</u>         | <u>24.01.2019-29.01.2019</u> | <u>13.5 (7.0)</u>                                  | <u>283 (408)</u>                                                           |
| <u>Tree 2(Winter)</u>          | <u>3.2.2019-4.2.2019</u>     | <u>13.5 (6.1)</u>                                  | <u>252 (319)</u>                                                           |
| <u>Tree 3(Winter)</u>          | <u>5.2.2019-6.2.2019</u>     | <u>19.9 (9.1)</u>                                  | <u>261 (310)</u>                                                           |
| <u>Tree 4 (Winter-offline)</u> | <u>9.2.2019-10.2.2019</u>    | <u>21.1 (12.1)</u>                                 | <u>338 (384)</u>                                                           |
| <u>Tree 1 (Summer)</u>         | <u>22.05.2018-24.05.2018</u> | <u>34.9 (4.7)</u>                                  | <u>266 (384)</u>                                                           |
| <u>Tree 1 (Monsoon)</u>        | <u>25.09.2018-04.10.2018</u> | <u>29.9 (8.0)</u>                                  | <u>232 (363)</u>                                                           |
| <u>Tree 1 (Post-monsoon)</u>   | <u>15.11.2018-22.11.2018</u> | <u>21.1 (7.1)</u>                                  | <u>170 (278)</u>                                                           |

Formatted: Normal, Line spacing: single

Table 2. Average seasonal BVOCs emission fluxes from big-leaf Mahogany in different seasons normalized to the leaf dry weight alongwith variability as standard deviation of the average in parantheses.

| <u>Season</u>                     | <u>Monoterpene</u><br><u>μg g<sup>-1</sup> hr<sup>-1</sup></u> | <u>Isoprene</u><br><u>μg g<sup>-1</sup> hr<sup>-1</sup></u> | <u>DMS</u><br><u>μg g<sup>-1</sup> hr<sup>-1</sup></u> |
|-----------------------------------|----------------------------------------------------------------|-------------------------------------------------------------|--------------------------------------------------------|
| <u>Summer-Avg</u>                 | <u>6.8 (10.1)</u>                                              | <u>0.1 (0.1)</u>                                            | <u>19.2 (19.0)</u>                                     |
| <u>Monsoon-Avg</u>                | <u>14.7 (21.6)</u>                                             | <u>0.1 (0.1)</u>                                            | <u>17.1 (17.1)</u>                                     |
| <u>Post-monsoon-Avg</u>           | <u>7.8 (12.8)</u>                                              | <u>0.1 (0.1)</u>                                            | <u>18.8 (21.6)</u>                                     |
| <u>Winter-Avg (Trees 1,2,3 4)</u> | <u>2.2 (3.6)</u>                                               | <u>0.02 (0.02)</u>                                          | <u>2.9 (4.3)</u>                                       |

Formatted: Superscript  
Formatted: Superscript  
Formatted: Superscript



Table 1. Average seasonal BVOCs fluxes from big-leaf Mahogany in different seasons normalized to the leaf dry weight

| Season           | Monoterpene<br>µg/g/hr | Isoprene<br>µg/g/hr | DMS<br>ng/g/hr |
|------------------|------------------------|---------------------|----------------|
| Summer-Avg       | 6.82                   | 0.06                | 19.16          |
| Monsoon-Avg      | 14.65                  | 0.09                | 17.06          |
| Post-monsoon-Avg | 7.84                   | 0.09                | 18.80          |
| Winter-Avg       | 2.23                   | 0.02                | 2.88           |

5

10

Table 3. Bivariate fit functions and their coefficients for BVOC emission flux parameterizations as function of PAR and temperature in both the reproductive and vegetative phases of Mahogany

|                                                                     |      |         |          |      |                                                                 |        |       |      |
|---------------------------------------------------------------------|------|---------|----------|------|-----------------------------------------------------------------|--------|-------|------|
| Vegetative phase modeling fn:<br>f(T,PAR) = a*exp(b*PAR)+c*exp(d*T) |      |         |          |      | Reproductive phase modeling fn:<br>f(T,PAR) = a* PAR+c*exp(d*T) |        |       |      |
|                                                                     | a    | b       | c        | d    |                                                                 | a      | c     | d    |
| Monoterpenes                                                        | 0.14 | 0.003   | 0.27     | 0.10 | Monoterpenes                                                    | 0.009  | 0.66  | 0.01 |
| Isoprene                                                            | 0.01 | 0.002   | 0.000008 | 0.20 | Isoprene                                                        | 0.0001 | 0.003 | 0.05 |
| DMS                                                                 | 1.89 | 0.00001 | 0.02     | 0.16 | DMS                                                             | 0.01   | 5.89  | 0.01 |

Table 2. Bivariate fit functions and their coefficients for BVOC flux parameterizations as function of PAR and temperature in both the reproductive and vegetative phases of Mahogany

|                                                                     |      |         |          |      |                                                                 |        |       |      |
|---------------------------------------------------------------------|------|---------|----------|------|-----------------------------------------------------------------|--------|-------|------|
| Vegetative phase modeling fn:<br>f(T,PAR) = a*exp(b*PAR)+c*exp(d*T) |      |         |          |      | Reproductive phase modeling fn:<br>f(T,PAR) = a* PAR+b*exp(c*T) |        |       |      |
|                                                                     | a    | b       | c        | d    |                                                                 | a      | b     | c    |
| Monoterpenes                                                        | 0.14 | 0.003   | 0.27     | 0.10 | Monoterpenes                                                    | 0.009  | 0.66  | 0.01 |
| Isoprene                                                            | 0.01 | 0.002   | 0.000008 | 0.20 | Isoprene                                                        | 0.0001 | 0.003 | 0.05 |
| DMS                                                                 | 1.89 | 0.00001 | 0.02     | 0.16 | DMS                                                             | 0.01   | 5.89  | 0.01 |

Table 3. Distribution of Mahogany in natural forests and in plantations in terms of ground area, tree density, leaf area and calculated annual emission fluxes of monoterpenes, isoprene and DMS.

| Country       | Natural<br>Area <sup>i</sup><br>(10 <sup>4</sup> km <sup>2</sup> ) | Plantation<br>Area <sup>ii</sup><br>(km <sup>2</sup> ) | Tree density <sup>iii</sup><br>Natural/Plantation<br>(x100 nos./km <sup>2</sup> ) | Leaf area <sup>iv</sup><br>(km <sup>2</sup> ) | Monoterpenes<br>(Gg/yr) | Isoprene<br>(Mg/yr) | DMS<br>(Mg/yr) |
|---------------|--------------------------------------------------------------------|--------------------------------------------------------|-----------------------------------------------------------------------------------|-----------------------------------------------|-------------------------|---------------------|----------------|
| Brazil        | 139.6                                                              | -                                                      | 0.014-1.17 <sup>b/-</sup>                                                         | 1564-10756                                    | 10-69                   | 82-565              | 17-119         |
| Peru          | 56.5                                                               | -                                                      | -                                                                                 | 9042                                          | 58                      | 475                 | 100            |
| Bolivia       | 18.9                                                               | -                                                      | 0.1-0.2 <sup>c/-</sup>                                                            | 1512-3025                                     | 9.7-19                  | 79-159              | 17-33          |
| Nicaragua     | 5                                                                  | -                                                      | 0.6/-                                                                             | 2400                                          | 15                      | 126                 | 27             |
| Mexico        | 3.6                                                                | -                                                      | 1.0/-                                                                             | 2881                                          | 18                      | 151                 | 32             |
| Ecuador       | 3.5                                                                | -                                                      | -                                                                                 | 2801                                          | 18                      | 147                 | 31             |
| Colombia      | 2.6                                                                | -                                                      | -                                                                                 | 2080                                          | 13                      | 109                 | 23             |
| Guatemala     | 2.8                                                                | -                                                      | 0.2-2.0/-                                                                         | 448-4480                                      | 2.9-29                  | 24-235              | 4.9-49         |
| Honduras      | 1.7                                                                | -                                                      | 2.0/-                                                                             | 2720                                          | 17                      | 143                 | 30             |
| Venezuela     | 1.2                                                                | -                                                      | 1.0 <sup>d/-</sup>                                                                | 960                                           | 6.1                     | 50                  | 11             |
| Panama        | 1                                                                  | -                                                      | 0.1/-                                                                             | 80                                            | 0.5                     | 4.2                 | 0.88           |
| Belize        | 1                                                                  | 5.91                                                   | 1.0-2.5/119-288 <sup>a</sup>                                                      | 825-2061                                      | 5.3-13                  | 43-108              | 9.1-23         |
| Costa Rica    | 0.3                                                                | -                                                      | 0.5-2.5/-                                                                         | 120-600                                       | 0.77-3.8                | 6.3-32              | 1.3-6.6        |
| Indonesia     | -                                                                  | 1160                                                   | -                                                                                 | 3410                                          | 22                      | 179                 | 38             |
| Fiji          | -                                                                  | 420                                                    | -                                                                                 | 1235                                          | 7.9                     | 65                  | 14             |
| Philippines   | -                                                                  | 250                                                    | -                                                                                 | 735                                           | 4.7                     | 39                  | 8              |
| Sri Lanka     | -                                                                  | 45                                                     | -                                                                                 | 132                                           | 0.85                    | 6.9                 | 1.5            |
| Guadeloupe    | -                                                                  | 40                                                     | -                                                                                 | 118                                           | 0.75                    | 6.2                 | 1.3            |
| Martinique    | -                                                                  | 15                                                     | -                                                                                 | 44                                            | 0.28                    | 2.3                 | 0.49           |
| Puerto Rico   | -                                                                  | 13.81                                                  | ~66.7-200 <sup>e</sup>                                                            | 33-99                                         | 0.21-0.64               | 1.8-5.2             | 0.37-1.1       |
| Kerala, India | -                                                                  | 1.70 <sup>a</sup>                                      | -                                                                                 | 5                                             | 0.03                    | 0.26                | 0.06           |
| Honduras      | -                                                                  | 1.50                                                   | -                                                                                 | 4                                             | 0.03                    | 0.23                | 0.05           |
| St. Lucia     | -                                                                  | 1.00                                                   | -                                                                                 | 3                                             | 0.02                    | 0.15                | 0.03           |
| TOTAL         | 237.7                                                              | 1953.92                                                |                                                                                   | 33154-49674                                   | 212-317                 | 1740-2607           | 366-548        |

<sup>i</sup>Blundell (2004), <sup>ii</sup>Lugo et al. (2003), <sup>iii</sup>Gillies et al. (1999), <sup>iv</sup>Mohandas (2000), <sup>a</sup>Grogan et al. (2008), <sup>e</sup>Gullison et al. (1996);

<sup>d</sup>Kammesheidt et al. (2001);

5 Leaf Area Index: 2.94 (Jhou et al., 2017)

Crown radius (m)= 0.139 x diameter (cm) — 2.82 x10<sup>-4</sup> x [diameter (cm)]<sup>2</sup>; r<sup>2</sup>= 0.97 (Gullison et al., 1996)

**Table 4. Distribution of Mahogany in natural forests and in plantations in terms of ground area, tree density, leaf area and calculated annual emission fluxes of monoterpenes, isoprene and DMS.**

| <u>Country</u>       | <u>Natural Area<sup>i</sup></u><br>(10 <sup>4</sup> km <sup>2</sup> ) | <u>Plantation Area<sup>ii</sup></u><br>(km <sup>2</sup> ) | <u>Tree density<sup>iii</sup></u><br><u>Natural/Plantation</u><br>(x10 <sup>2</sup> km <sup>-2</sup> ) | <u>Leaf area<sup>iv</sup></u><br>(km <sup>2</sup> ) | <u>Monoterpenes</u><br>(Gg yr <sup>-1</sup> ) | <u>Isoprene</u><br>(Mg yr <sup>-1</sup> ) | <u>DMS</u><br>(Mg yr <sup>-1</sup> ) |
|----------------------|-----------------------------------------------------------------------|-----------------------------------------------------------|--------------------------------------------------------------------------------------------------------|-----------------------------------------------------|-----------------------------------------------|-------------------------------------------|--------------------------------------|
| <u>Brazil</u>        | 139.6                                                                 | -                                                         | 0.014-1.17 <sup>b/-</sup>                                                                              | 1564-10756                                          | 10-69                                         | 82-565                                    | 17-119                               |
| <u>Peru</u>          | 56.5                                                                  | -                                                         | -                                                                                                      | 9042                                                | 58                                            | 475                                       | 100                                  |
| <u>Bolivia</u>       | 18.9                                                                  | -                                                         | 0.1-0.2 <sup>c/-</sup>                                                                                 | 1512-3025                                           | 9.7-19                                        | 79-159                                    | 17-33                                |
| <u>Nicaragua</u>     | 5                                                                     | -                                                         | 0.6/-                                                                                                  | 2400                                                | 15                                            | 126                                       | 27                                   |
| <u>Mexico</u>        | 3.6                                                                   | -                                                         | 1.0/-                                                                                                  | 2881                                                | 18                                            | 151                                       | 32                                   |
| <u>Ecuador</u>       | 3.5                                                                   | -                                                         | -                                                                                                      | 2801                                                | 18                                            | 147                                       | 31                                   |
| <u>Colombia</u>      | 2.6                                                                   | -                                                         | -                                                                                                      | 2080                                                | 13                                            | 109                                       | 23                                   |
| <u>Guatemala</u>     | 2.8                                                                   | -                                                         | 0.2-2.0/-                                                                                              | 448-4480                                            | 2.9-29                                        | 24-235                                    | 4.9-49                               |
| <u>Honduras</u>      | 1.7                                                                   | -                                                         | 2.0/-                                                                                                  | 2720                                                | 17                                            | 143                                       | 30                                   |
| <u>Venezuela</u>     | 1.2                                                                   | -                                                         | 1.0 <sup>d/-</sup>                                                                                     | 960                                                 | 6.1                                           | 50                                        | 11                                   |
| <u>Panama</u>        | 1                                                                     | -                                                         | 0.1/-                                                                                                  | 80                                                  | 0.5                                           | 4.2                                       | 0.88                                 |
| <u>Belize</u>        | 1                                                                     | 5.91                                                      | 1.0-2.5/119-288 <sup>e</sup>                                                                           | 825-2061                                            | 5.3-13                                        | 43-108                                    | 9.1-23                               |
| <u>Costa Rica</u>    | 0.3                                                                   | -                                                         | 0.5-2.5/-                                                                                              | 120-600                                             | 0.77-3.8                                      | 6.3-32                                    | 1.3-6.6                              |
| <u>Indonesia</u>     | -                                                                     | 1160                                                      | -                                                                                                      | 3410                                                | 22                                            | 179                                       | 38                                   |
| <u>Fiji</u>          | -                                                                     | 420                                                       | -                                                                                                      | 1235                                                | 7.9                                           | 65                                        | 14                                   |
| <u>Philippines</u>   | -                                                                     | 250                                                       | -                                                                                                      | 735                                                 | 4.7                                           | 39                                        | 8                                    |
| <u>Sri Lanka</u>     | -                                                                     | 45                                                        | -                                                                                                      | 132                                                 | 0.85                                          | 6.9                                       | 1.5                                  |
| <u>Guadeloupe</u>    | -                                                                     | 40                                                        | -                                                                                                      | 118                                                 | 0.75                                          | 6.2                                       | 1.3                                  |
| <u>Martinique</u>    | -                                                                     | 15                                                        | -                                                                                                      | 44                                                  | 0.28                                          | 2.3                                       | 0.49                                 |
| <u>Puerto Rico</u>   | -                                                                     | 13.81                                                     | -/66.7-200 <sup>e</sup>                                                                                | 33-99                                               | 0.21-0.64                                     | 1.8-5.2                                   | 0.37-1.1                             |
| <u>Kerala, India</u> | -                                                                     | 1.70 <sup>a</sup>                                         | -                                                                                                      | 5                                                   | 0.03                                          | 0.26                                      | 0.06                                 |
| <u>Honduras</u>      | -                                                                     | 1.50                                                      | -                                                                                                      | 4                                                   | 0.03                                          | 0.23                                      | 0.05                                 |
| <u>St. Lucia</u>     | -                                                                     | 1.00                                                      | -                                                                                                      | 3                                                   | 0.02                                          | 0.15                                      | 0.03                                 |
| <b>TOTAL</b>         | 237.7                                                                 | 1953.92                                                   |                                                                                                        | 33154-49674                                         | 212-317                                       | 1740-2607                                 | 366-548                              |
| <u>Country</u>       | <u>Natural Area<sup>i</sup></u><br>(10 <sup>4</sup> km <sup>2</sup> ) | <u>Plantation Area<sup>ii</sup></u><br>(km <sup>2</sup> ) | <u>Tree density<sup>iii</sup></u><br><u>Natural/Plantation</u><br>(x10 <sup>2</sup> km <sup>-2</sup> ) | <u>Leaf area<sup>iv</sup></u><br>(km <sup>2</sup> ) | <u>Monoterpenes</u><br>(Gg/yr)                | <u>Isoprene</u><br>(Mg/yr)                | <u>DMS</u><br>(Mg/yr)                |
| <u>Brazil</u>        | 139.6                                                                 | -                                                         | 0.014-1.17 <sup>b/-</sup>                                                                              | 1564-10756                                          | 10-69                                         | 82-565                                    | 17-119                               |
| <u>Peru</u>          | 56.5                                                                  | -                                                         | -                                                                                                      | 9042                                                | 58                                            | 475                                       | 100                                  |
| <u>Bolivia</u>       | 18.9                                                                  | -                                                         | 0.1-0.2 <sup>c/-</sup>                                                                                 | 1512-3025                                           | 9.7-19                                        | 79-159                                    | 17-33                                |
| <u>Nicaragua</u>     | 5                                                                     | -                                                         | 0.6/-                                                                                                  | 2400                                                | 15                                            | 126                                       | 27                                   |
| <u>Mexico</u>        | 3.6                                                                   | -                                                         | 1.0/-                                                                                                  | 2881                                                | 18                                            | 151                                       | 32                                   |
| <u>Ecuador</u>       | 3.5                                                                   | -                                                         | -                                                                                                      | 2801                                                | 18                                            | 147                                       | 31                                   |
| <u>Colombia</u>      | 2.6                                                                   | -                                                         | -                                                                                                      | 2080                                                | 13                                            | 109                                       | 23                                   |
| <u>Guatemala</u>     | 2.8                                                                   | -                                                         | 0.2-2.0/-                                                                                              | 448-4480                                            | 2.9-29                                        | 24-235                                    | 4.9-49                               |
| <u>Honduras</u>      | 1.7                                                                   | -                                                         | 2.0/-                                                                                                  | 2720                                                | 17                                            | 143                                       | 30                                   |

|                      |                     |                         |                                    |                           |                       |                         |                       |
|----------------------|---------------------|-------------------------|------------------------------------|---------------------------|-----------------------|-------------------------|-----------------------|
| <u>Venezuela</u>     | <u>1.2</u>          | =                       | <u>1.0<sup>d</sup>/-</u>           | <u>960</u>                | <u>6.1</u>            | <u>50</u>               | <u>11</u>             |
| <u>Panama</u>        | <u>1</u>            | =                       | <u>0.1/-</u>                       | <u>80</u>                 | <u>0.5</u>            | <u>4.2</u>              | <u>0.88</u>           |
| <u>Belize</u>        | <u>1</u>            | =                       | <u>1.0-2.5/119-288<sup>e</sup></u> | <u>825-2061</u>           | <u>5.3-13</u>         | <u>43-108</u>           | <u>9.1-23</u>         |
| <u>Costa Rica</u>    | <u>0.3</u>          | =                       | <u>0.5-2.5/-</u>                   | <u>120-600</u>            | <u>0.77-3.8</u>       | <u>6.3-32</u>           | <u>1.3-6.6</u>        |
| <u>Indonesia</u>     | =                   | <u>1160</u>             | =                                  | <u>3410</u>               | <u>22</u>             | <u>179</u>              | <u>38</u>             |
| <u>Fiji</u>          | =                   | <u>420</u>              | =                                  | <u>1235</u>               | <u>7.9</u>            | <u>65</u>               | <u>14</u>             |
| <u>Philippines</u>   | =                   | <u>250</u>              | =                                  | <u>735</u>                | <u>4.7</u>            | <u>39</u>               | <u>8</u>              |
| <u>Sri Lanka</u>     | =                   | <u>45</u>               | =                                  | <u>132</u>                | <u>0.85</u>           | <u>6.9</u>              | <u>1.5</u>            |
| <u>Guadeloupe</u>    | =                   | <u>40</u>               | =                                  | <u>118</u>                | <u>0.75</u>           | <u>6.2</u>              | <u>1.3</u>            |
| <u>Martinique</u>    | =                   | <u>15</u>               | =                                  | <u>44</u>                 | <u>0.28</u>           | <u>2.3</u>              | <u>0.49</u>           |
| <u>Puerto Rico</u>   | =                   | <u>13.81</u>            | = <u>-/66.7-200<sup>e</sup></u>    | <u>33-99</u>              | <u>0.21-0.64</u>      | <u>1.8-5.2</u>          | <u>0.37-1.1</u>       |
| <u>Kerala, India</u> | =                   | <u>1.70<sup>a</sup></u> | =                                  | <u>5</u>                  | <u>0.03</u>           | <u>0.26</u>             | <u>0.06</u>           |
| <u>Honduras</u>      | =                   | <u>1.50</u>             | =                                  | <u>4</u>                  | <u>0.03</u>           | <u>0.23</u>             | <u>0.05</u>           |
| <u>St. Lucia</u>     | =                   | <u>1.00</u>             | =                                  | <u>3</u>                  | <u>0.02</u>           | <u>0.15</u>             | <u>0.03</u>           |
| <b><u>TOTAL</u></b>  | <b><u>237.7</u></b> | <b><u>1953.92</u></b>   |                                    | <b><u>33154-49674</u></b> | <b><u>212-317</u></b> | <b><u>1740-2607</u></b> | <b><u>366-548</u></b> |

<sup>i</sup>, <sup>inc</sup>Lugo et al. (2003), <sup>iii</sup>Gillies et al. (1999), <sup>a</sup>Mohandas (2000), <sup>b</sup>Grogan et al. (2008), <sup>c</sup>Gullison et al. (1996), <sup>d</sup>Kammesheidt et al. (2001); Leaf Area Index: 2.94 (Jhou et al., 2017); Crown radius (m)= 0.139 x diameter (cm) - 2.82 x10<sup>-4</sup> x [diameter (cm)]<sup>2</sup>, r<sup>2</sup> = 0.97 (Gullison et al., 1996)

Formatted: English (India)

Formatted: Normal, Line spacing: single

## Supplementary information to:

### High DMS and monoterpene emitting big leaf Mahogany trees: discovery of a missing DMS source to the atmospheric environment

Lejish Vettikkat<sup>1</sup>, Vinayak Sinha<sup>1</sup>, Savita Datta<sup>1</sup>, Ashish Kumar<sup>1</sup>, Haseeb Hakkim<sup>1</sup>, and Priya Yadav<sup>1</sup>,  
5 Baerbel Sinha<sup>1</sup>

<sup>1</sup>Department of Earth and Environmental Sciences, Indian Institute of Science Education and Research Mohali, Sector 81, S.  
A. S. Nagar, Manauli PO, Punjab, 140306, India

Correspondence to: Dr. Vinayak Sinha (vsinha@iisermohali.ac.in)

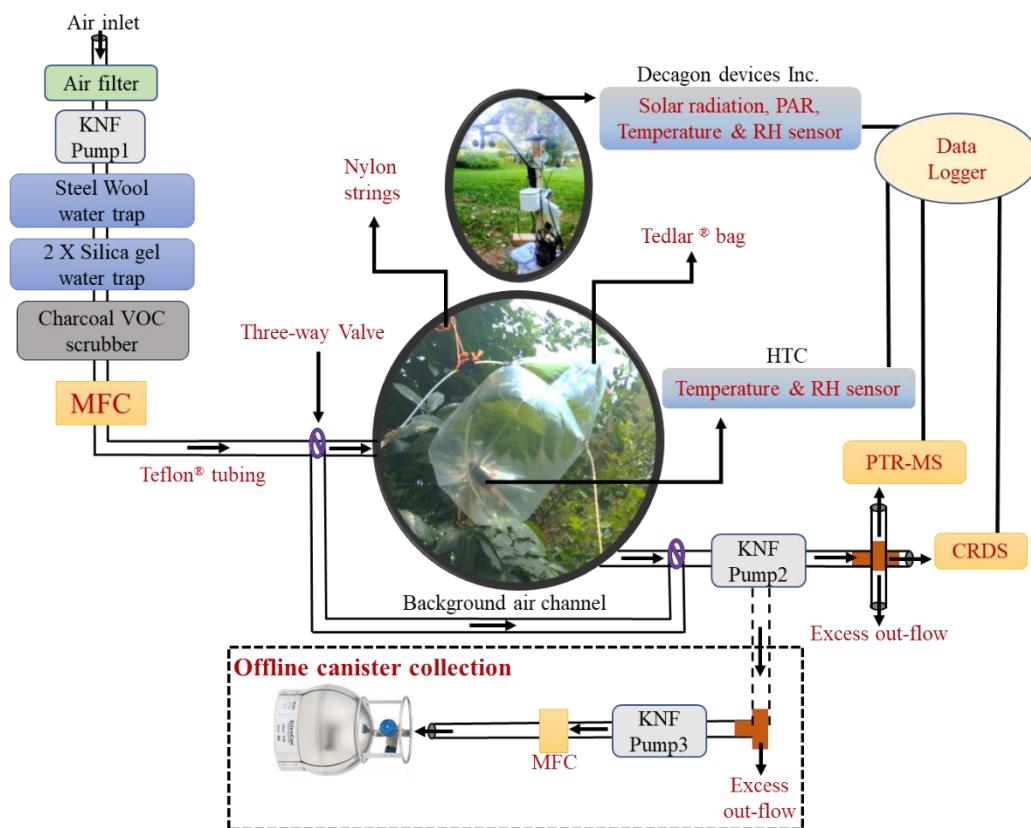

Figure S1. Schematic of dynamic branch cuvette setup. Offline canister collection scheme is depicted in the dashed rectangle. MFC: Mass flow controller. PTR-MS: proton transfer reaction mass spectrometry. CRDS: Cavity ring down spectroscopy. PAR: Photosynthetically active radiation.

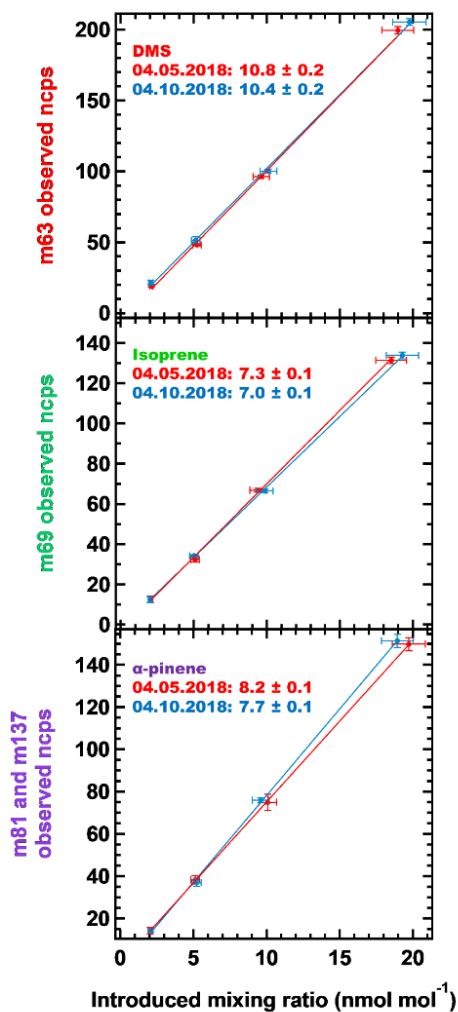

Figure S2. Results of calibration experiments performed on 4 May 2018 and 4 October 2018 for DMS, isoprene and  $\alpha$ -pinene illustrating the excellent linearity and low drift in sensitivity of the PTR-QMS for these compounds

5

The instrument was calibrated at least four times during the period of study on 4 May, 4 October, 14 November 2018 and 22 January 2019 at different humidities (~ 40 % RH, 60 % RH and 70% RH) using a VOC standard (Apel-Riemer Environmental, Inc., Colorado, USA) by dynamic dilution with zero air at four different mixing ratios (in the range of 2–20 ppbv) for each



VOC. The measured m/z ion signals in counts per second (cps) ( $I_{R_tH^+}$ ) for each VOC was converted to normalized cps (ncps) with respect to sum of reagent  $H_3O^+$  ion signal ( $I_{H_3O^+}$ ) and first water cluster  $H_3O^+(H_2O)$  signal ( $I_{H_3O^+(H_2O)}$ ) using the following normalization equation:

$$ncps = \frac{I_{R_tH^+} \times 10^6}{I_{H_3O^+} + I_{H_3O^+(H_2O)}} \times \frac{2}{p_{drift}} \times \frac{T_{drift}}{298.15}$$

5

The normalized counts per second (ncps) thus calculated was corrected for dilution using zero air using the equation (2):

$$ncps \times Total\ flow = (ncps_{zero} \times Zero\ air\ flow) + (ncps_g \times Standard\ gas\ flow) \quad (1)$$

$$ncps_g = \frac{(ncps \times Total\ flow) - (ncps_{zero} \times Zero\ air\ flow)}{Standard\ gas\ flow} \quad (2)$$

10

These ncps corrected for dilution ( $ncps_g$ ) were converted to sensitivity (ncps/ppb) by plotting it in y-axis with the introduced concentration of gas standard of each VOC in x-axis. The slope of the graph yielded the sensitivity factor for each VOC which was then used to calculate the mixing ratio (in ppb) from the measured counts per second of each VOC. The standard deviation in  $ncps_g$  along with the error in the flows during calibration gives the uncertainty of each VOC measurement. The percentage instrumental uncertainty was then calculated using the root mean square propagation of individual uncertainties like the 5% accuracy error inherent in the VOC gas standard concentration, the  $2\sigma$  instrumental precision error while sampling 10 ppbv of the VOC and error in the flow reproducibility (2%) of the two mass flow controllers.

15

The overall uncertainty in fluxes was calculated by propagating the error in each term in the flux calculation formula and the drift in sensitivity:

20

$$EF = \frac{m_{out} - m_{in}}{V_m} \times \frac{Q}{A} \quad (1)$$

where, EF is the emission flux,  $m_{out} - m_{in}$  is the difference in mixing ratios of the BVOC between input and output air, Q is the flow rate of air passing through the cuvette system in  $m^3\ s^{-1}$ ,  $V_m$  is the molar volume of gas calculated using the cuvette temperature and ideal gas law.

25 Following are the major steps in calculating the overall uncertainty of fluxes:

Step 1: Let the error in measurement of  $m_{out}$  and  $m_{in}$  be  $s_{out}$  and  $s_{in}$  respectively. Since the percentage uncertainties associated with measurement of  $m_{out}$  and  $m_{in}$  are equal, we can say that  $\frac{s_{out}}{m_{out}} = \frac{s_{in}}{m_{in}}$ .

Step 2. Uncertainty in measurement of BVOC of difference of input and output air from cuvette.

$$\text{Let, } y = m_{out} - m_{in}, \quad s_y = \sqrt{s_{out}^2 + s_{in}^2} \quad (2)$$

30 Since we have percentage uncertainties instead of individual absolute uncertainties,  $s_y$  can be written as:

$$s_y = \sqrt{m_{out}^2 \left(\frac{s_{out}}{m_{out}}\right)^2 + m_{in}^2 \left(\frac{s_{in}}{m_{in}}\right)^2} = \sqrt{(m_{out}^2 + m_{in}^2) \left(\frac{s_{out}}{m_{out}}\right)^2} = \sqrt{(m_{out}^2 + m_{in}^2)} \frac{s_{out}}{m_{out}} \quad (3)$$

Further simplifying equation (3) we obtain that the maximum relative uncertainty (if  $m_{out} = m_{in}$ ) as:

Therefore the maximum uncertainty (if  $m_{out} = m_{in}$ ) is given as:

$$s_y = \sqrt{2} m_{out} \quad (4)$$

$$\frac{s_y}{y} = \sqrt{2} \frac{s_{out}}{m_{out}} \quad (5)$$

- 5 In the case of plant chamber experiments,  $m_{out} \gg m_{in}$ , therefore the maximum uncertainty in difference (y) is 1.4 times the instrumental uncertainty,  $\frac{s_{out}}{m_{out}}$ .

Step 3: Now since the equation (1) contains only products and quotients to calculate the propagation of error,

$$\frac{s_{EF}}{EF} = \sqrt{\left(\frac{s_y}{y}\right)^2 + \left(\frac{s_Q}{Q}\right)^2 + \left(\frac{s_{V_m}}{V_m}\right)^2 + \left(\frac{s_A}{A}\right)^2 + \left(\frac{s_D}{D}\right)^2} \quad (6)$$

- We substitute Eq. (5) with Eq. (4) and by the propagation of individual uncertainties like 2% error in the flow measurement of  
 10 MFC: (EL-FLOW; Bronkhorst High-Tech), 1.67% error in the leaf area measurement (Easy Leaf Area doi: 10.3732/app.1400033), uncertainty of molar volume calculation: <1 % (molar volume is calculated theoretically using ideal gas law) and percentage drift in sensitivity (d).

$$\frac{s_{EF}}{EF} (\%) = \sqrt{(1.4 \times \text{instrumental uncertainty} (\%))^2 + 2^2 + 1 + 1.67^2 + d^2} \quad (7)$$

15

- For example, to calculate the total measurement uncertainty (%) in emission fluxes of DMS, isoprene and sum of monoterpenes during post monsoon, we substitute the instrumental uncertainty in mixing ratio and percentage drift in sensitivity of PTR-MS for these 3 compounds (DMS < 3.8%; isoprene < 4.1 % and alpha-pinene < 6.1 %) obtained from calibration experiments  
 20 conducted on 4 May 2018 and 4 October 2018 in Eq. (7).

$$DMS, \frac{s_{EF}}{EF} (\%) = \sqrt{8.9^2 + 4 + 1 + 1.67^2 + 3.8^2} = 13 \%$$

$$Isoprene, \frac{s_{EF}}{EF} (\%) = \sqrt{8.9^2 + 4 + 1 + 1.67^2 + 4.1^2} = 13 \%$$

25

$$Monoterpenes, \frac{s_{EF}}{EF} (\%) = \sqrt{9.9^2 + 4 + 1 + 1.67^2 + 6.1^2} = 12 \%$$

The total uncertainty in emissions flux measurements, while not being able to correct between 4 May and 4 October (which spans over 5 months including monsoon season) with new sensitivity, is less than equal to 13% for all the reported VOCs. Thus the calculated total measurement uncertainty can be considered as the upper limit for monsoon season as well.

5

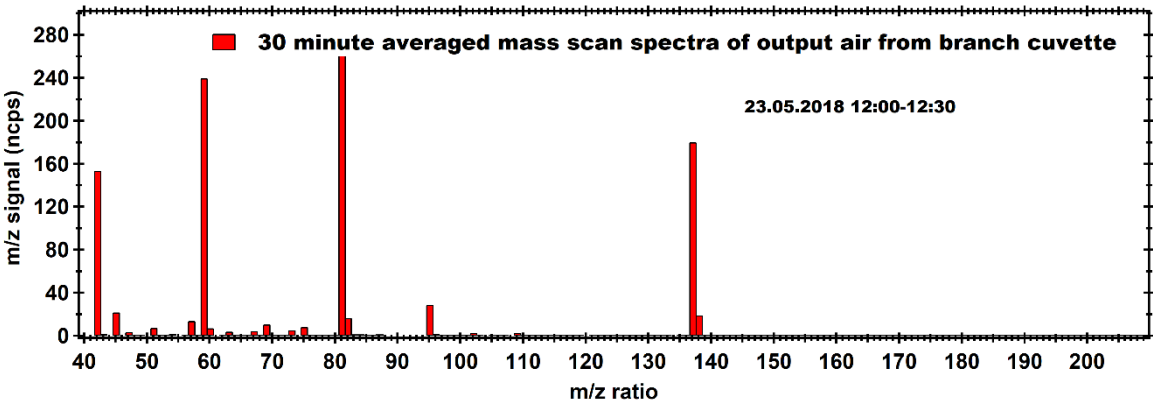

Figure S3: A typical 30 min averaged PTR-MS mass scan of the output air from the branch cuvette system during the afternoon period after subtraction of input background air signals showing the ion signals observed in the mass range m/z 40 to m/z 210.

10

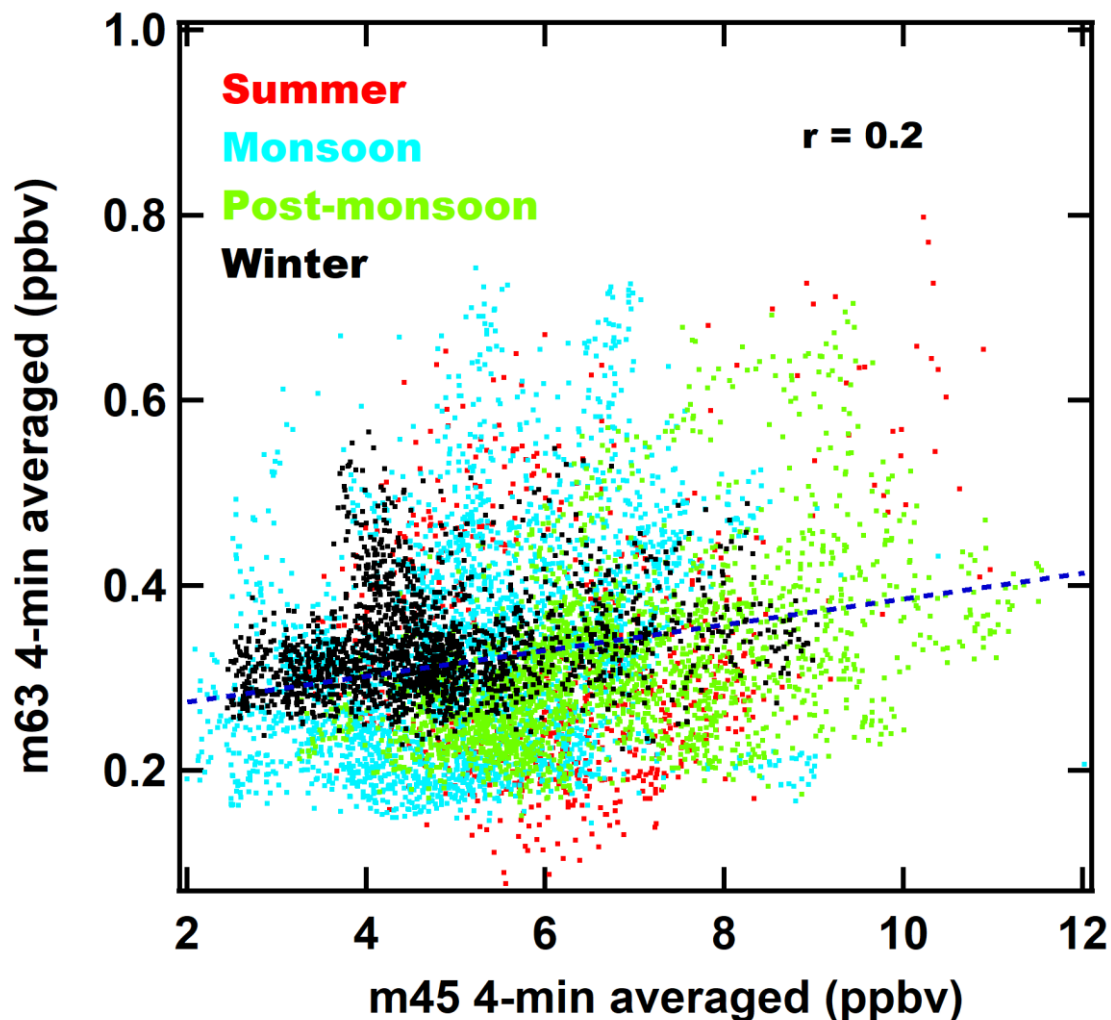

**Figure S4: Correlation of m/63 ion signal with m/z 45 ion signal for all seasons**

Below we show the chromatographic peak for isoprene from the output air of the branch cuvette system identified based on the retention time of isoprene vapours that were sampled under identical operating conditions with the TD-GC-FID. The isoprene data co-measured with the TD-GC-FID for the monsoon season alongwith the isoprene data measured with the PTR-QMS, was found to have excellent correlation of the PTR-MS isoprene signal but the absolute values were much lower due to the suspected losses within the TD-GC-FID system.

**Isoprene measurements by Thermal Desorption-Gas Chromatography-Flame Ionization Detector (TD-GC-FID):**

Isoprene was detected in output air from the branch cuvette using a gas chromatograph equipped with a flame ionization detector (GC-FID 7890B, Agilent Technologies, Santa Clara, United States) which is coupled to a thermal desorption unit (CIA Advantage-HL and Unity 2, Markes International, UK) for sampling and pre-concentration. Water in the sample air was removed using a nafion dryer which also removed the oxygenated VOCs such as alcohols, aldehydes and ketones (Badol et al., 2004; Gros et al., 2011). 1000 ml of dry sample air was then pre-concentrated at -30°C at 20 ml min<sup>-1</sup> on an ozone precursor trap (U-T1703P-2S, Markes International, UK) which was then thermally desorbed by rapid heating to 325°C. The desorbed analytes were then transferred onto the GC instrument via a heated inlet (130°C) line. The GC instrument consisted of a capillary column (Alumina PLOT, Al<sub>2</sub>O<sub>3</sub>/Na<sub>2</sub>SO<sub>4</sub>, 50 m x 0.32 mm, 8 µm film thickness, Agilent Technologies, Santa Clara, United States). The oven temperature was ramped from 30°C (hold for 12 min) to 200°C at the rates of 5°C min<sup>-1</sup> (upto 170°C) and 15°C min<sup>-1</sup> (upto 200°C) for resolving the peaks.

Isoprene was resolved on Alumina PLOT column at a retention time of 37.5 min and identified based on the retention time of isoprene vapours injected into the TD-GC-FID system under identical instrument operational conditions as the sample. The eluted isoprene was then detected using the FID. Unfortunately due to the suspected transfer losses within the GC system, which could not be corrected, the data is only semi-quantitative and hence reported in arbitrary units.

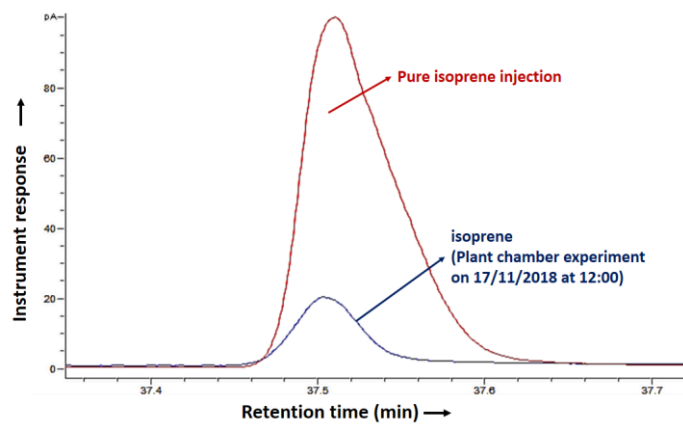

**Figure S5: Sample chromatogram of the isoprene peak resolved on the Alumina PLOT column at a retention time of 37.5 min in the air collected from the plant chamber experiment overlaid with the peak from pure isoprene vapours injected to determine the retention time of isoprene.**

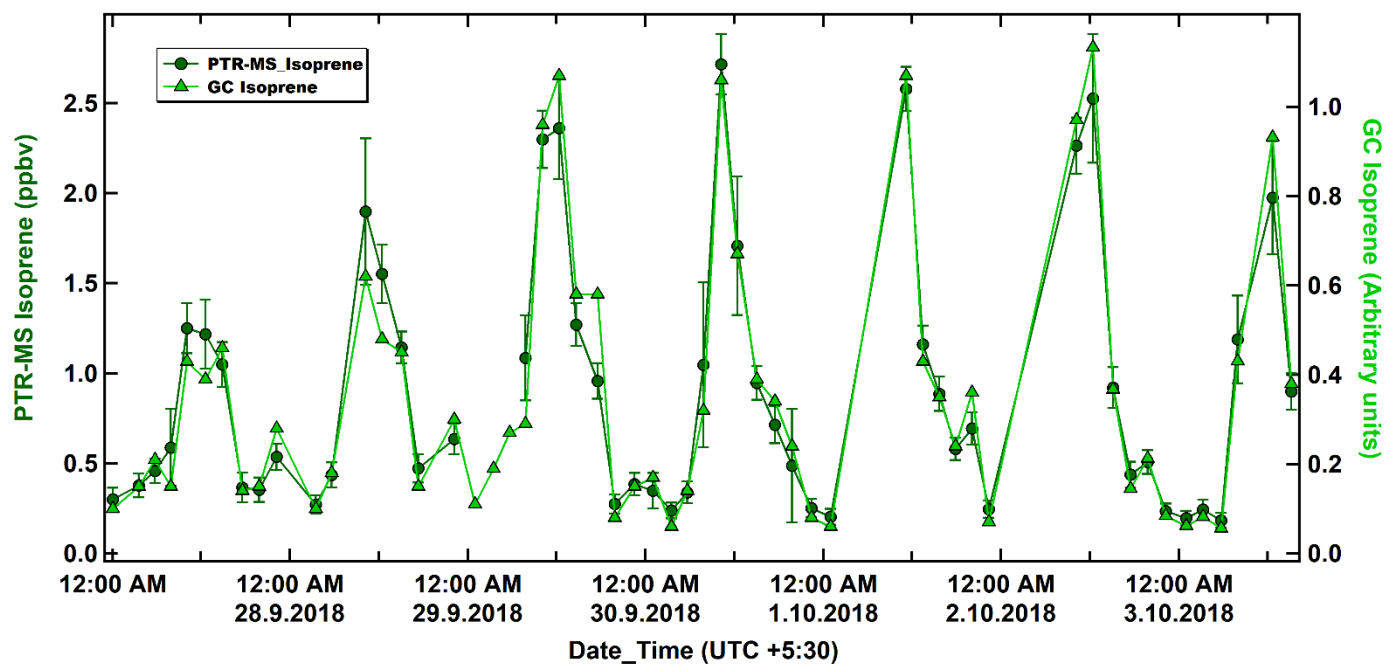

Figure S6. Times series of hourly averaged isoprene measurements from PTR-MS and TD-GC-FID for monsoon season



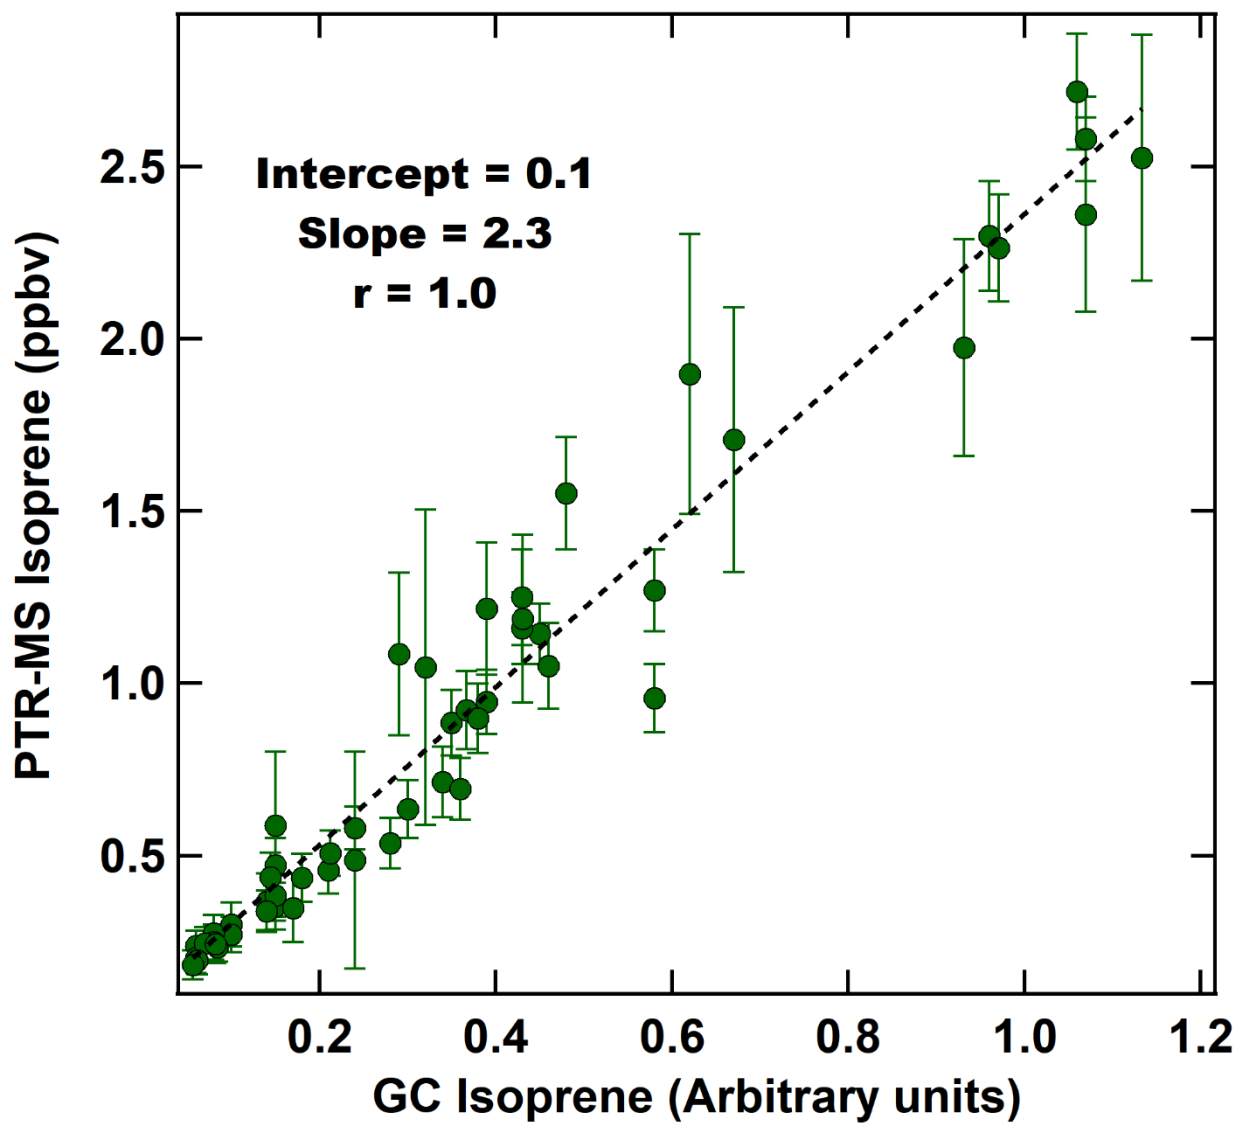

Figure S7 Correlation of isoprene data measured with PTR-MS and TD-GC-FID for monsoon season

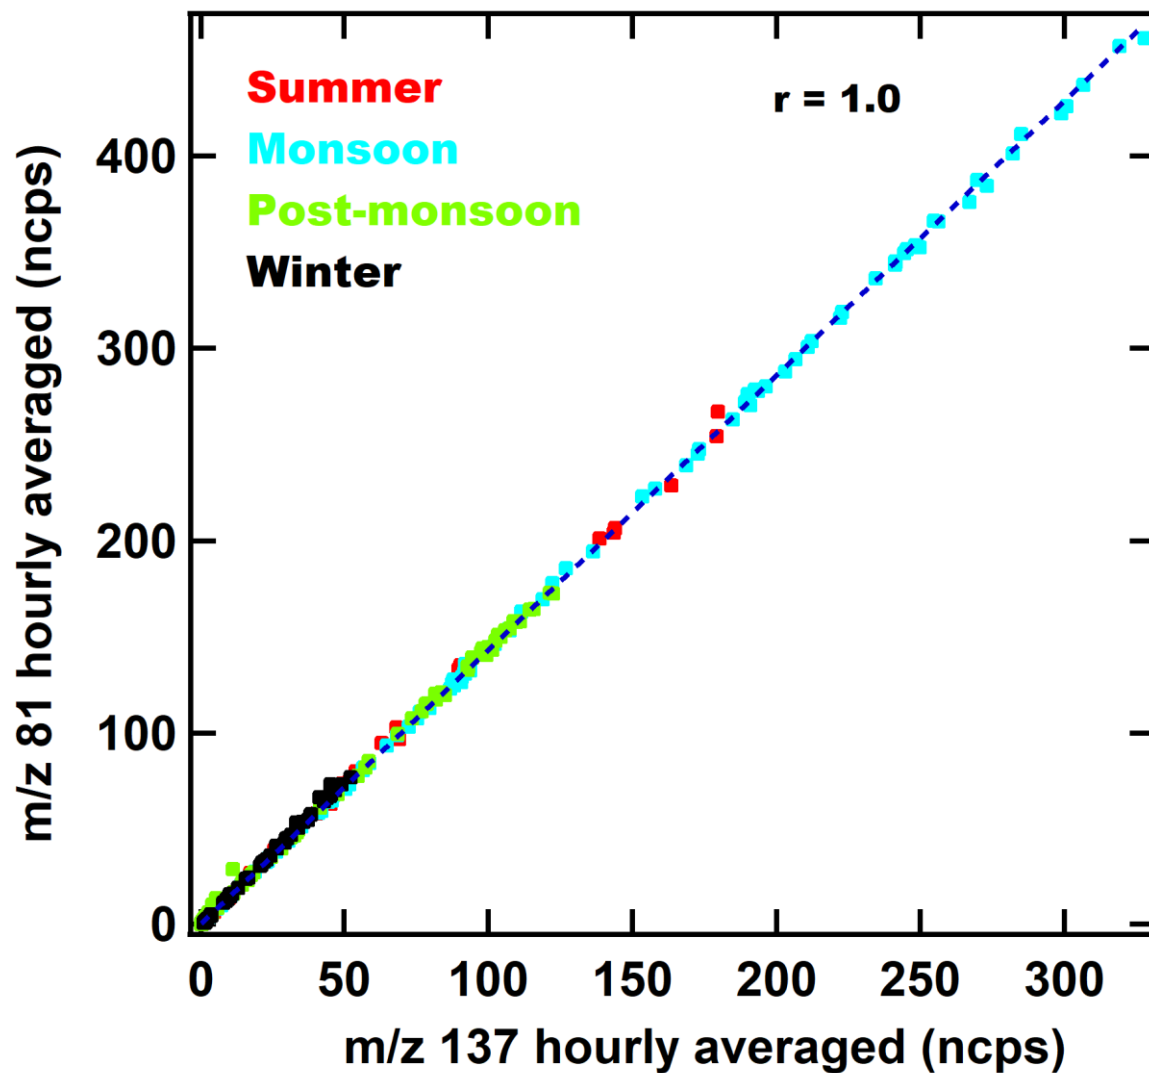

Figure S8: Correlation between observed m81 and m137 signals from the plant chamber output air for all seasons

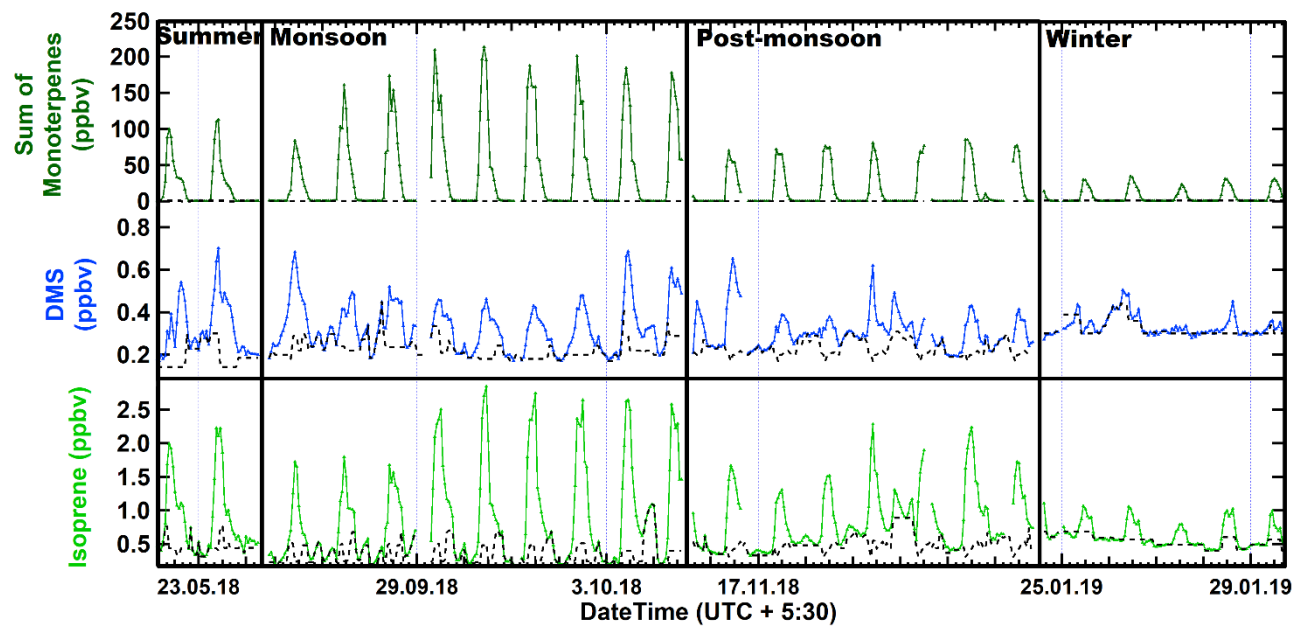

Figure S9: Time series of BVOC mixing ratios (hourly averages) with the corresponding background mixing ratios in  $\text{nmol mol}^{-1}$ . Background mixing ratios are shown as dotted line

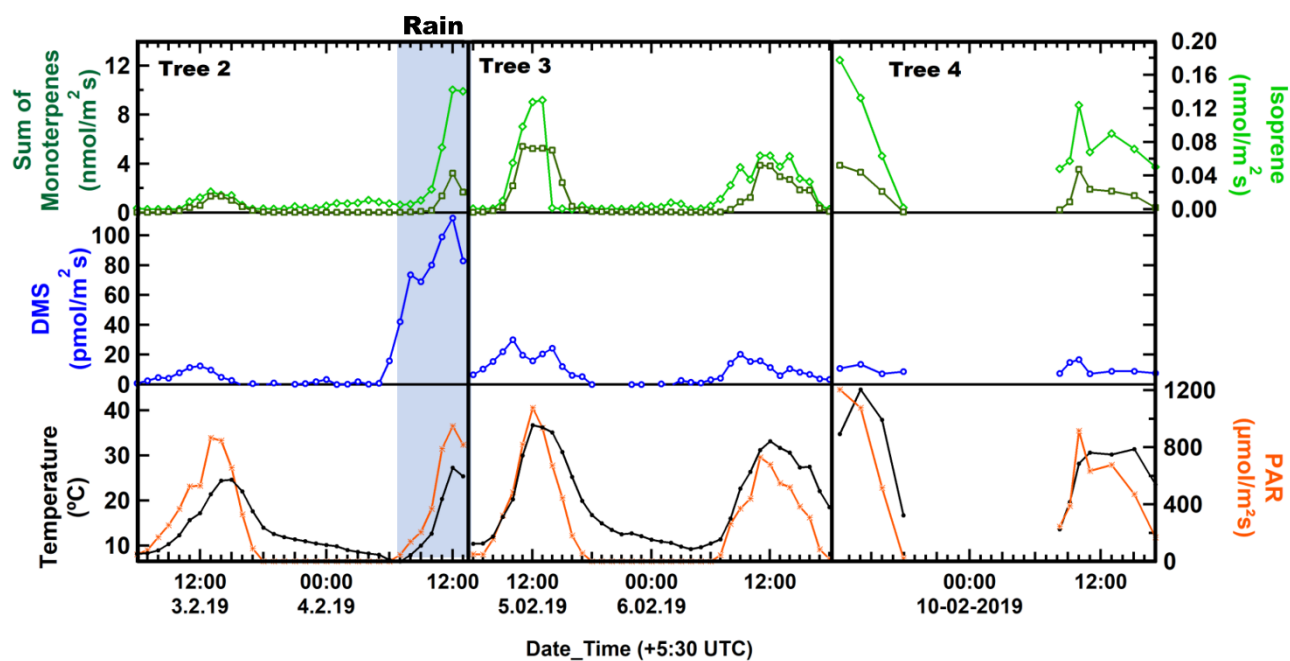

Figure S10: Wintertime BVOC emission fluxes along with PAR and temperature. (expressed in nanomols or picomols per leaf area per second). Blue shaded region marks rain event.

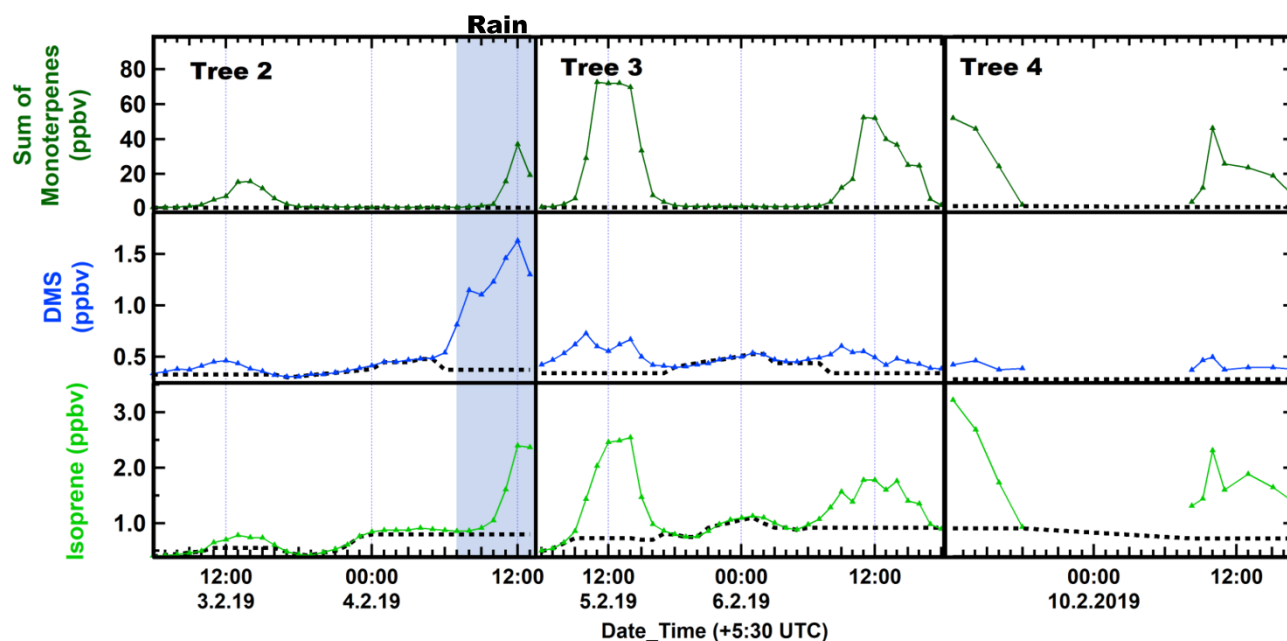

Figure S11: Time series of winter time BVOC mixing ratios observed for Trees 2, 3 and 4 with the corresponding background mixing ratios in  $\text{nmol mol}^{-1}$ . Background mixing ratios are shown as dotted line. Blue shaded region marks a rain event

- 5 Table S1: Details of the VOC gas standard ([Apel–Riemer Environmental, Inc., Colorado, USA](#)) used in the calibration experiments

| Compound            | Mixing ratio in VOC standard (ppb); Stated accuracy 5% |
|---------------------|--------------------------------------------------------|
| Methanol            | 503                                                    |
| Acetonitrile        | 491                                                    |
| Methyl vinyl ketone | 479                                                    |
| Methyl ethyl ketone | 497                                                    |
| Acetaldehyde        | 490                                                    |
| Acetone             | 493                                                    |
| DMS                 | 495                                                    |
| Isoprene            | 483                                                    |

|                        |     |   |
|------------------------|-----|---|
| Benzene                | 492 |   |
| Toluene                | 468 |   |
| p-Xylene               | 477 |   |
| $\alpha$ -pinene       | 494 |   |
| 1,2,4-Trimethylbenzene | 510 | 5 |

10 **Table S2. Sensitivity factor, limit of detection, instrumental uncertainty and overall uncertainty of measured VOCs from calibration experiments conducted on 4 May 2018 and 4 October 2018.**

| Calibration<br>performed date<br>(RH) | VOC          | Sensitivity<br>factor<br>(ncps ppb <sup>-1</sup> ) | Limit of<br>detection<br>(ppb)* | Instrumental<br>uncertainty<br>(%) | Overall<br>uncertainty<br>(%) |
|---------------------------------------|--------------|----------------------------------------------------|---------------------------------|------------------------------------|-------------------------------|
| 04.05.2018<br>(40%)                   | DMS          | 10.77 $\pm$ 0.14                                   | 0.06                            | 6                                  | 10                            |
|                                       | Isoprene     | 7.27 $\pm$ 0.13                                    | 0.10                            | 6                                  | 10                            |
|                                       | Monoterpenes | 8.21 $\pm$ 0.13                                    | 0.07                            | 7                                  | 12                            |
| 04.10.2018<br>(70%)                   | DMS          | 10.42 $\pm$ 0.21                                   | 0.12                            | 6                                  | 13                            |
|                                       | Isoprene     | 7.01 $\pm$ 0.07                                    | 0.04                            | 6                                  | 13                            |
|                                       | Monoterpenes | 7.67 $\pm$ 0.05                                    | 0.07                            | 7                                  | 12                            |

15 \*The limit of detection is defined as 2 $\sigma$  of the measured normalized signal while measuring zero air (99.999% purity; Sigma gases, New Delhi) divided by the sensitivity.



**Table S3. Leaf area and leaf dry weight inside the cuvette during all the experiments**

| Season         | Leaf area (m <sup>2</sup> ) | Leaf dry weight (g) | g/m <sup>2</sup>    |
|----------------|-----------------------------|---------------------|---------------------|
| Summer         | 0.3                         | 30.1                | 96.1                |
| Monsoon        | 0.3                         | 28.2                | 82.8 <sup>5</sup>   |
| Post-monsoon   | 0.2                         | 20.5                | 109.4               |
| Winter         | 0.2                         | 26.8                | 135.3               |
| Winter (2)     | 0.3                         | 27.3                | 102.3 <sup>10</sup> |
| Winter (3)     | 0.2                         | 31.7                | 138.9               |
| Winter-Offline | 0.3                         | 36.1                | 139.8               |

References:

Badol, C., Borbon, A., Locoge, N., Léonardis, T., and Galloo, J.-C.: An automated monitoring system for VOC ozone precursors in ambient air: development, implementation and data analysis, *Analytical and bioanalytical chemistry*, 378, 1815-1827, <https://doi.org/10.1007/s00216-003-2474-0>, 2004.

20 Gros, V., Gaimoz, C., Hermann, F., Custer, T., Williams, J., Bonsang, B., Sauvage, S., Locoge, N., d’Argouges, O., and Sarda-Estève, R.: Volatile organic compounds sources in Paris in spring 2007. Part I: qualitative analysis, *Environmental Chemistry*, 8, 74-90, <https://doi.org/10.1071/EN10068>, 2011.
